# Supplementary material for: Advancing molecular macrobenthos biodiversity monitoring: a comparison between Oxford Nanopore and Illumina based metabarcoding and metagenomics
Source: PeerJ journal article supplement (doi:10.7717/peerj.19158), 2025-04-14

## Miseq Rarefaction curves

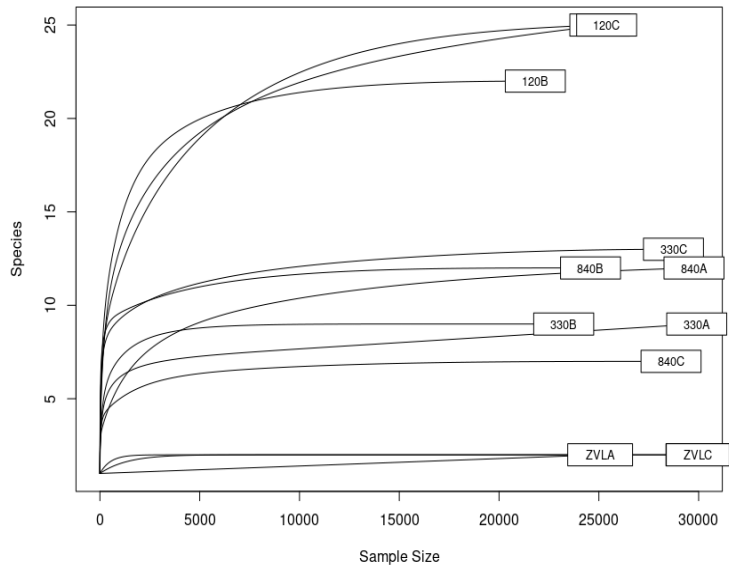

## Nanopore Rarefaction curves

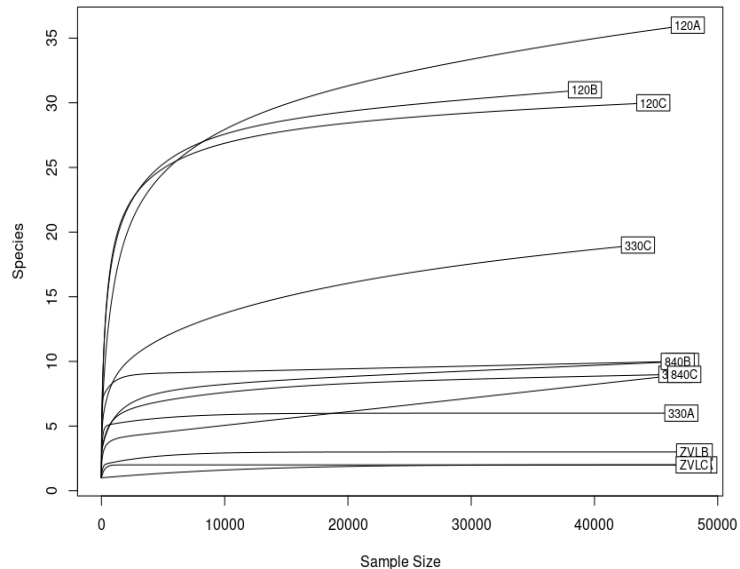

Supplement: Figure_S1_revisions_platform.pdf [file Figure_S1_revisions_platform.pdf]
