# Supplementary material for: Advancing molecular macrobenthos biodiversity monitoring: a comparison between Oxford Nanopore and Illumina based metabarcoding and metagenomics
Source: PeerJ journal article supplement (doi:10.7717/peerj.19158), 2025-04-14

a

|                                                                                                    |        |
|----------------------------------------------------------------------------------------------------|--------|
| Total percentage Nanopore consensus sequences matching MiSeq ASVs (>97% identity)                  | 98,86% |
| From the matching ASVs, the Percentage of differently assigned taxonomies for the nanopore dataset | 1.1%   |

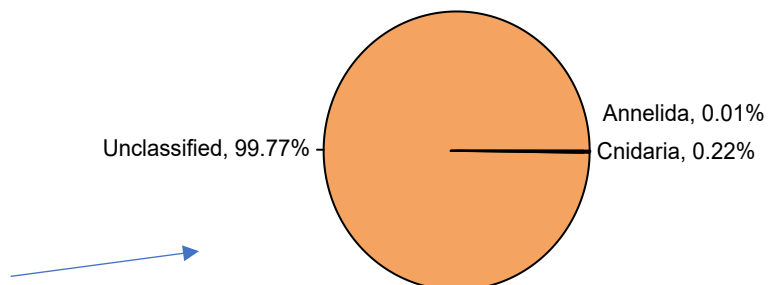

b

|                                                                                                           |        |
|-----------------------------------------------------------------------------------------------------------|--------|
| Total percentage MiSeq ASV matching Nanopore consensus sequences (>97% identity)                          | 98.79% |
| From the matching ASVs, the Percentage of differently assigned taxonomy assignments for the MiSeq dataset | 1.21%  |

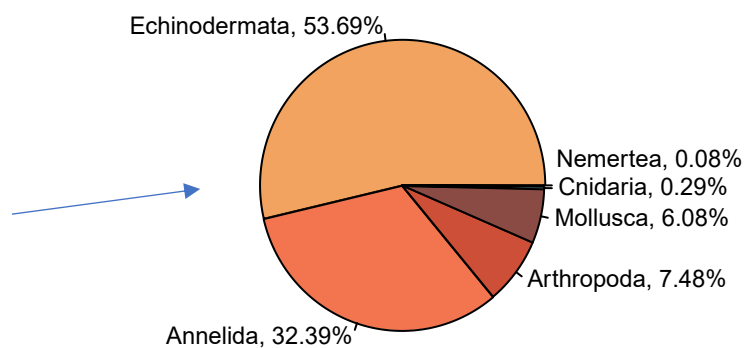

Supplement: Figure_S2_illustrator.pdf [file Figure_S2_illustrator.pdf]
