# Supplementary material for: Advancing molecular macrobenthos biodiversity monitoring: a comparison between Oxford Nanopore and Illumina based metabarcoding and metagenomics
Source: PeerJ. 2025 Apr 14;13:e19158. doi: 10.7717/peerj.19158 (PMC12005195; doi:10.7717/peerj.19158)
Supplement: Supplemental Information 1 — Columns size class indicate the size class of each species. Size class corrected data were calculated by multiply the average size class with the number of individuals. [file peerj-13-19158-s001.xlsx]

## Sheet: Table_S1_morph_species_count
	120	330	840	ZVL	Totaal	sizeclass	sizeclass_average	sizeclass_correction
Abludomelita obtusata	7	1	0	0	8	sr<10	5	40
Abra alba	3	0	0	1	4	sr11-20	15	60
Acrocnida brachiata	2	0	0	0	2	sr101-200	150	300
Aonides oxycephala	1	0	0	0	1	sr21-100	60	60
Aonides paucibranchiata	0	0	1	0	1	sr21-100	60	60
Apolochus neapolitanus	1	0	0	0	1	sr<10	5	5
Bathyporeia elegans	0	1	0	0	1	sr<10	5	5
Bathyporeia guilliamsoniana	0	0	1	0	1	sr<10	5	5
Capitella minima	2	0	0	0	2	sr21-100	60	120
Caulleriella alata	6	0	0	0	6		15	90
Crepidula fornicata	1	0	0	0	1	sr21-100	60	60
Diogenes pugilator	0	1	0	0	1	sr11-20	15	15
Echinocardium cordatum	2	0	0	0	2	sr21-100	60	120
Ensis leei	1	0	0	0	1	sr101-200	150	150
Eteone longa	5	0	0	0	5	sr101-200	150	750
Eumida sanguinea	11	0	0	0	11	sr21-100	60	660
Fabulina fabula	18	0	0	0	18	sr11-20	15	270
Gastrosaccus spinifer	1	1	2	0	4	sr11-20	15	60
Glycera lapidum	0	2	0	0	2	sr101-200	150	300
Glycera tridactyla	3	0	0	0	3	sr11-20	15	45
Harmothoe glabra	3	0	0	0	3	sr21-100	60	180
Hesionura elongata	0	4	1	0	5	sr11-20	15	75
Kurtiella bidentata	5	0	0	0	5	sr<10	5	25
Lagis koreni	1	0	0	0	1	sr21-100	60	60
Limecola balthica	0	0	0	5	5	sr11-20	15	75
Liocarcinus holsatus	1	0	0	0	1	sr21-100	60	60
Liocarcinus marmoreus	0	0	1	0	1	sr21-100	60	60
Magelona johnstoni	15	0	0	0	15	sr21-100	60	900
Mediomastus fragilis	20	1	0	0	21	sr21-100	60	1260
Monocorophium acherusicum	0	2	0	0	2	sr<10	5	10
Mytilus edulis	3	0	0	0	3	sr21-100	60	180
Nephtys cirrosa	0	4	1	0	5	sr101-200	150	750
Nephtys hombergii	4	0	0	0	4	sr101-200	150	600
Notomastus latericeus	17	0	1	0	18	sr201-500	350	6300
Nototropis swammerdami	0	2	0	0	2	sr<10	5	10
Ophiura albida	1	0	0	0	1	sr21-100	60	60
Ophiura ophiura	5	0	0	0	5	sr21-100	60	300
Owenia fusiformis	6	0	0	0	6	sr201-500	350	2100
Pagurus bernhardus	1	0	0	0	1	sr21-100	60	60
Pariambus typicus	11	0	0	0	11	sr<10	5	55
Petricolaria pholadiformis	0	0	0	1	1	sr21-100	60	60
Pholoe baltica	2	0	0	0	2	sr11-20	15	30
Phyllodoce mucosa	1	0	0	0	1	sr101-200	150	150
Pisidia longicornis	0	0	2	0	2	sr11-20	15	30
Protodriloides chaetifer	0	1	0	0	1	sr11-20	15	15
Pseudopolydora pulchra	1	0	0	0	1		15	15
Sigalion mathildae	1	0	0	0	1	sr101-200	150	150
Spiophanes bombyx	5	0	0	0	5	sr21-100	60	300
Spirobranchus lamarckii	1	0	0	0	1	sr11-20	15	15
Spisula elliptica	0	1	0	0	1	sr11-20	15	15
Sthenelais boa	2	0	0	0	2	sr101-200	150	300
Streptodonta pterochaeta	0	0	1	0	1	sr11-20	15	15
Tanaissus lilljeborgi	0	0	1	0	1	sr<10	5	5
Tellimya ferruginosa	7	0	0	0	7	sr<10	5	35
Tryphosa nana	1	0	0	0	1	sr<10	5	5
Urothoe brevicornis	0	12	0	0	12	sr<10	5	60
Venerupis corrugata	2	0	0	0	2	sr21-100	60	120
Total species number	39	13	10	3
