# Supplementary material for: Advancing molecular macrobenthos biodiversity monitoring: a comparison between Oxford Nanopore and Illumina based metabarcoding and metagenomics
Source: PeerJ. 2025 Apr 14;13:e19158. doi: 10.7717/peerj.19158 (PMC12005195; doi:10.7717/peerj.19158)
Supplement: Supplemental Information 2 — =Start volume of BULK material for each extraction. Samples labeled DNA were used directly as DNA extracts. [file peerj-13-19158-s002.xlsx]

## Sheet: Table_S2_extraction_volumes
Sample material received from ILVO
	Metagenomics (Nord university)	Amplicons (Naturalis)
120A	6ml	6ml
120B	6ml	6ml
120C	6ml	6ml
330A	6ml	6ml
330B	6ml	6ml
330C	6ml	6ml
840A	6ml	6ml
840B	6ml	6ml
840C	6ml	DNA82 +DNA83+DNA84
ZVLA	2ml + DNA32 +DNA57	DNA32 +DNA86**+DNA87***
ZVLB	6ml	6ml
ZVLC	6ml	DNA93+DNA95+DNA96
Where the "DNA" sample refers to the respective DNA extracts directly obtained from ILVO see publication
Van den Bulcke, L., De Backer, A., Wittoeck, J., Beentjes, K., Maes, S., Christodoulou, M., ... & Derycke, S. (2023). DNA metabarcoding on repeat: Sequencing data of marine macrobenthos are reproducible and robust across labs and protocols. Ecological Indicators, 150, 110207.
**	8 ul
***	5 ul
