# Supplementary material for: Advancing molecular macrobenthos biodiversity monitoring: a comparison between Oxford Nanopore and Illumina based metabarcoding and metagenomics
Source: PeerJ. 2025 Apr 14;13:e19158. doi: 10.7717/peerj.19158 (PMC12005195; doi:10.7717/peerj.19158)
Supplement: Supplemental Information 3 [file peerj-13-19158-s003.xlsx]

## Sheet: Table_S3_Raw_counts_during_proc
DNA Method	Sample	Output Reads	Filtered reads	Assembled contigs/reads for taxonomy	reads assigned to species	Used database		HITS NOVASEQ with NCBI References
novaseq	120A	325601204	280039801	280039801	4849167	NCBI		REFERENCE ID	REFERENCE NAME
novaseq	120B	227831344	206654794	206654794	2615230	NCBI		gb|KF741686.1|	Abra alba isolate KELL.SUB cytochrome b (cytb) gene
novaseq	120C	294266452	249606555	249606555	3869151	NCBI		emb|AM392445.1|	Abra alba partial 18S rRNA gene
novaseq	330A	259484921	189759557	189759557	3157847	NCBI		emb|AM774533.1|	Abra alba partial 18S rRNA gene
novaseq	330B	370625502	290446200	290446200	5196941	NCBI		emb|AM779707.1|	Abra alba partial 28S rRNA gene
novaseq	330C	241406566	235315213	235315213	3598688	NCBI		gb|KC429397.1|	Abra alba voucher BivAToL-190 18S ribosomal RNA gene
novaseq	840A	407105954	297489186	297489186	5457584	NCBI		gb|KC429505.1|	Abra alba voucher BivAToL-190 28S ribosomal RNA gene
novaseq	840B	407293585	290899142	290899142	4937478	NCBI		gb|EU431196.1|	Acrocnida brachiata clone D-Lin.I-4 internal transcribed spacer 2
novaseq	840C	138941208	92321117	92321117	2224152	NCBI		gb|DQ507708.1|	Acrocnida brachiata isolate ARB11 cytochrome oxidase subunit I (COI) gene
novaseq	ZVLA	326501645	240071589	240071589	4747334	NCBI		gb|KU894998.1|	Acrocnida brachiata isolate F218661 cytochrome oxidase subunit I gene
novaseq	ZVLB	15323971	11938131	11938131	144745	NCBI		emb|FR694622.1|	Anapagurus laevis mitochondrial partial 16S rRNA gene
novaseq	ZVLC	46034768	40979188	40979188	544434	NCBI		gb|MG935369.1|	Atylus swammerdami voucher Crust 17434V cytochrome oxidase subunit 1 (COI) gene
ILLumina	120A	797248	706309	677582	283899	Curated COI		gb|AY826951.1|	Bathyporeia pilosa 18S ribosomal RNA gene
ILLumina	120B	782399	677298	652431	253614	Curated COI		gb|DQ377996.1|	Bathyporeia sardoa 18S ribosomal RNA gene
ILLumina	120C	766004	670603	642446	300073	Curated COI		gb|KT209390.1|	Bathyporeia sp. BOLD:ACG9200 voucher MT03942 cytochrome oxidase subunit 1 (COI) gene
ILLumina	330A	726463	651547	640904	418376	Curated COI		gb|KR916806.1|	Cirriformia sp. BOLD:ACO5094 voucher LMBP23-003 cytochrome oxidase subunit 1 (COI) gene
ILLumina	330B	691436	590555	576895	370117	Curated COI		gb|MT365644.1|	Cirriformia sp. MG385 large subunit ribosomal RNA gene
ILLumina	330C	920456	822291	813114	434463	Curated COI		gb|MT365645.1|	Cirriformia sp. MG389 large subunit ribosomal RNA gene
ILLumina	840A	886151	796760	789261	407883	Curated COI		gb|KT033725.1|	Cirriformia tentaculata 16S ribosomal RNA gene
ILLumina	840B	1419428	1223034	1190692	260748	Curated COI		gb|AY611443.1|	Cirriformia tentaculata 28S ribosomal RNA gene
ILLumina	840C	531724	471231	468239	396450	Curated COI		gb|KP794930.1|	Cirriformia tentaculata cytochrome oxidase subunit I gene
ILLumina	ZVLA	948577	826367	708023	427198	Curated COI		gb|HM013985.1|	Crepidula fornicata BMP4 (BMP4) mRNA
ILLumina	ZVLB	1208840	807457	744530	412665	Curated COI		gb|MN561847.1|	Crepidula fornicata Bmpr1b mRNA
ILLumina	ZVLC	527361	448957	426877	428105	Curated COI		gb|MH142401.1|	Crepidula fornicata C-ets-1-like mRNA
Nanopore	120A	104493	65369	64212	56209	Curated COI		gb|DQ087480.1|	Crepidula fornicata catalase mRNA
Nanopore	120B	213119	164664	81156	81206	Curated COI		gb|DQ203242.1|	Crepidula fornicata clone Cf10a-rev microsatellite sequence
Nanopore	120C	205291	153795	106256	93234	Curated COI		gb|DQ203240.1|	Crepidula fornicata clone Cf34-rev microsatellite sequence
Nanopore	330A	159996	124071	120255	120269	Curated COI		gb|HM040887.1|	Crepidula fornicata clone CFC001 Pitx (PITX) mRNA
Nanopore	330B	242368	190046	102981	102976	Curated COI		gb|HM040888.1|	Crepidula fornicata clone CFC002 Piwi (PIWI) mRNA
Nanopore	330C	281977	217043	111843	111908	Curated COI		gb|HM040895.1|	Crepidula fornicata clone CFC009 SMURF2 (SMURF2) mRNA
Nanopore	840A	85183	65486	65160	61925	Curated COI		gb|HM040899.1|	Crepidula fornicata clone CFC013 mRNA sequence
Nanopore	840B	143013	111683	56858	56858	Curated COI		gb|AY234060.1|	Crepidula fornicata clone CfCA4 microsatellite sequence
Nanopore	840C	351204	266695	1155	1155	Curated COI		gb|AY234059.1|	Crepidula fornicata clone CfCA6 microsatellite sequence
Nanopore	ZVLA	89920	69987	69939	571	Curated COI		gb|AY234058.1|	Crepidula fornicata clone CfCATGT microsatellite sequence
Nanopore	ZVLB	122271	93042	92822	91175	Curated COI		gb|HM013988.1|	Crepidula fornicata crystallin gamma S-like protein mRNA
Nanopore	ZVLC	427182	319504	319216	123382	Curated COI		gb|DQ087484.1|	Crepidula fornicata elongation factor 1 alpha mRNA
								gb|KM434317.1|	Crepidula fornicata forkhead box protein A (FoxA) mRNA
								gb|KP902717.1|	Crepidula fornicata Hes A mRNA
								gb|KM434318.1|	Crepidula fornicata homeobox protein Nkx2.1-like (TTF1) mRNA
								gb|KM434320.1|	Crepidula fornicata homeobox protein orthodenticle (Otx) mRNA
								gb|KC583386.1|	Crepidula fornicata isolate Crepidula 12S ribosomal RNA gene
								gb|KM434321.1|	Crepidula fornicata neurogenic locus notch protein (Notch) mRNA
								gb|MH142405.1|	Crepidula fornicata Snail2b mRNA
								gb|MH142406.1|	Crepidula fornicata T-box brain 1 mRNA
								gb|MH142397.1|	Crepidula fornicata transcriptional regulator ERG-like protein
								gb|JF750968.1|	Crepidula fornicata voucher FLMNH419266 28S ribosomal RNA gene
								gb|JF750985.1|	Crepidula fornicata voucher FLMNH419266 histone 3 (H3) gene
								ref|NC_045515.1|	Diadumene lineata mitochondrion
								gb|KF808160.1|	Diogenes pugilator cytochrome oxidase subunit 1 (COI) gene
								gb|EF999879.1|	Echinocardium cordatum 28S large subunit ribosomal RNA gene
								gb|EF999880.1|	Echinocardium cordatum 28S large subunit ribosomal RNA gene
								emb|AJ225812.1|	Echinocardium cordatum 28S ribosomal RNA
								dbj|LC011955.1|	Echinocardium cordatum alx1 mRNA for aristaless-like transcription factor 1
								gb|AY143638.1|	Echinocardium cordatum clone EL10 microsatellite sequence
								gb|AY143639.1|	Echinocardium cordatum clone EL12 microsatellite sequence
								gb|AY143633.1|	Echinocardium cordatum clone EL3 microsatellite sequence
								gb|AY143635.1|	Echinocardium cordatum clone EL5 microsatellite sequence
								gb|AY143637.1|	Echinocardium cordatum clone EL8 microsatellite sequence
								gb|AY143644.1|	Echinocardium cordatum clone EM4 microsatellite sequence
								gb|AY143645.1|	Echinocardium cordatum clone EM6 microsatellite sequence
								gb|AY143657.1|	Echinocardium cordatum clone EO9 microsatellite sequence
								emb|FN562581.1|	Echinocardium cordatum complete mitochondrial genome
								dbj|LC011958.1|	Echinocardium cordatum cyp1 mRNA for cyclophilin protein
								dbj|LC011957.1|	Echinocardium cordatum ets1 mRNA for Ets transcription factor 1
								dbj|LC011959.1|	Echinocardium cordatum gcm mRNA for glial cells missing transcription factor
								dbj|LC011952.1|	Echinocardium cordatum micro1A mRNA for paired-like class homeodomain transcription factor Micro1/Pmar1 A
								emb|LK934688.1|	Echinocardium cordatum partial mRNA for putative eukaryotic elongation factor 1A (eef1a gene)
								emb|LK934686.1|	Echinocardium cordatum partial mRNA for putative sodium/potassium ATPase alpha sub unit
								emb|LK934687.1|	Echinocardium cordatum partial mRNA for putative tubulin
								dbj|LC011956.1|	Echinocardium cordatum tbr mRNA for T-brain transcription factor
								gb|DQ073743.1|	Echinocyamus pusillus 16S large subunit ribosomal RNA (rrnL) gene
								gb|DQ073762.1|	Echinocyamus pusillus 28S large subunit ribosomal RNA gene
								gb|MG935233.1|	Echinocyamus pusillus voucher Echin 6278V cytochrome oxidase subunit 1 (COI) gene
								gb|EU876534.1|	Ectopleura dumortierii 16S ribosomal RNA gene
								gb|JX121590.1|	Ectopleura dumortierii cytochrome oxidase subunit I (COI) gene
								gb|KT601631.1|	Ectopleura larynx cytochrome oxidase subunit 1 (COI) gene
								gb|JN700938.1|	Ectopleura larynx mitochondrion
								gb|AY920760.1|	Ectopleura larynx small subunit 18S ribosomal RNA gene
								gb|EU883553.1|	Ectopleura marina large subunit 28S ribosomal RNA gene
								gb|MT293123.1|	Electra pilosa strain BLEED819 mitochondrion sequence
								gb|MT311330.1|	Electra pilosa voucher BLEED819 small subunit ribosomal RNA gene
								emb|AM182264.1|	Ensis americanus partial 18S rRNA gene
								emb|AM933618.1|	Ensis directus 18S rRNA gene (partial)
								emb|AM933622.1|	Ensis directus 18S rRNA gene (partial)
								gb|JF909603.1|	Ensis directus 28S large subunit ribosomal RNA gene
								emb|AM933633.1|	Ensis directus 5.8S rRNA gene (partial)
								emb|AM904926.1|	Ensis directus 5S rRNA gene and IGS
								emb|AM904883.1|	Ensis directus 5S rRNA gene and IGS
								emb|AM904933.1|	Ensis directus 5S rRNA gene and IGS
								emb|AM904923.1|	Ensis directus 5S rRNA gene and IGS
								emb|AM904913.1|	Ensis directus 5S rRNA gene and IGS
								emb|AM904931.1|	Ensis directus 5S rRNA gene and IGS
								emb|AM904927.1|	Ensis directus 5S rRNA gene and IGS
								emb|AM904897.1|	Ensis directus 5S rRNA gene and IGS
								emb|AM904886.1|	Ensis directus 5S rRNA gene and IGS
								emb|AM904919.1|	Ensis directus 5S rRNA gene and IGS
								emb|AM904924.1|	Ensis directus 5S rRNA gene and IGS
								emb|AM904930.1|	Ensis directus 5S rRNA gene and IGS
								emb|AM904914.1|	Ensis directus 5S rRNA gene and IGS
								emb|AM904925.1|	Ensis directus 5S rRNA gene and IGS
								emb|AM904885.1|	Ensis directus 5S rRNA gene and IGS
								emb|AM904896.1|	Ensis directus 5S rRNA gene and IGS
								emb|AM904915.1|	Ensis directus 5S rRNA gene and IGS
								emb|AM904901.1|	Ensis directus 5S rRNA gene and IGS
								emb|AM906192.1|	Ensis directus 5S rRNA gene
								emb|AM906198.1|	Ensis directus 5S rRNA gene
								emb|AM906202.1|	Ensis directus 5S rRNA gene
								emb|AM906181.1|	Ensis directus 5S rRNA gene
								emb|AM906191.1|	Ensis directus 5S rRNA gene
								emb|AM906190.1|	Ensis directus 5S rRNA gene
								emb|AM906201.1|	Ensis directus 5S rRNA gene
								emb|AM906200.1|	Ensis directus 5S rRNA gene
								emb|AM906182.1|	Ensis directus 5S rRNA gene
								emb|AM906193.1|	Ensis directus 5S rRNA gene
								emb|AM906196.1|	Ensis directus 5S rRNA gene
								emb|AM906195.1|	Ensis directus 5S rRNA gene
								emb|AM906194.1|	Ensis directus 5S rRNA gene
								emb|AM906186.1|	Ensis directus 5S rRNA gene
								gb|AF404508.1|	Ensis directus arginine kinase mRNA
								gb|EU256506.1|	Ensis directus clone 2 12S ribosomal RNA gene
								gb|MH025769.1|	Ensis directus clone AMNH-13F-4M-1 retrotransposon Steamer-like element polyprotein (pol) gene
								gb|MH025779.1|	Ensis directus clone AMNH-13F-S4-1 retrotransposon Steamer-like element polyprotein (pol) gene
								gb|MH025794.1|	Ensis directus clone AMNH-1R-L2L2-02 retrotransposon Steamer-like element GagPol pseudogene
								gb|MH025795.1|	Ensis directus clone AMNH-1R-LPM-02 retrotransposon Steamer-like element polyprotein (pol) pseudogene
								gb|GQ166610.1|	Ensis directus cytochrome b (cytb) gene
								emb|HE661953.1|	Ensis directus genomic DNA containing ITS1
								emb|HE661875.1|	Ensis directus genomic DNA containing ITS1
								emb|HE661853.1|	Ensis directus genomic DNA containing ITS1
								emb|HE661891.1|	Ensis directus genomic DNA containing ITS1
								emb|HE661893.1|	Ensis directus genomic DNA containing ITS1
								emb|HE661908.1|	Ensis directus genomic DNA containing ITS1
								emb|HE661910.1|	Ensis directus genomic DNA containing ITS1
								emb|HE661911.1|	Ensis directus genomic DNA containing ITS1
								emb|HE661920.1|	Ensis directus genomic DNA containing ITS1
								emb|HE661923.1|	Ensis directus genomic DNA containing ITS1
								emb|HE661925.1|	Ensis directus genomic DNA containing ITS1
								emb|HE661858.1|	Ensis directus genomic DNA containing ITS1
								emb|HE661932.1|	Ensis directus genomic DNA containing ITS1
								emb|HE662101.1|	Ensis directus genomic DNA containing ITS2
								emb|HE662112.1|	Ensis directus genomic DNA containing ITS2
								emb|HE662114.1|	Ensis directus genomic DNA containing ITS2
								emb|HE662039.1|	Ensis directus genomic DNA containing ITS2
								emb|FN391057.1|	Ensis directus internal transcribed spacer 1
								emb|FN391030.1|	Ensis directus internal transcribed spacer 1
								emb|FN391036.1|	Ensis directus internal transcribed spacer 1
								emb|FN391096.1|	Ensis directus internal transcribed spacer 2
								gb|EU523678.1|	Ensis directus isolate 6 cytochrome c oxidase subunit I (COI) gene
								emb|HF970452.1|	Ensis directus mitochondrial partial 16S rRNA gene
								dbj|LC575970.1|	Ensis directus OJK1 mitochondrial COX1 gene for cytochrome c oxidase subunit 1
								dbj|LC575971.1|	Ensis directus OJK2 mitochondrial COX1 gene for cytochrome c oxidase subunit 1
								emb|HE661796.1|	Ensis directus partial ant gene for adenine nucleotide translocase
								emb|HE661787.1|	Ensis directus partial ant gene for adenine nucleotide translocase
								gb|MF077405.1|	Ensis directus voucher WAM70647 small subunit ribosomal RNA gene
								gb|AF120555.1|	Ensis ensis 18S ribosomal RNA gene
								emb|AJ309019.1|	Ensis ensis 18S rRNA gene
								gb|AF120616.1|	Ensis ensis 28S ribosomal RNA gene
								emb|FN908905.1|	Ensis ensis 5S rRNA gene region containing u1 snRNAs
								gb|AY070159.1|	Ensis ensis histone H3 gene
								gb|MF000489.1|	Eutima gegenbauri isolate DNA009 voucher MHNG:INVE-31748 cytochrome oxidase subunit I (COI) gene
								gb|FJ550600.1|	Eutima gegenbauri voucher MHNG INVE31748 18S ribosomal RNA gene
								gb|FJ550456.1|	Eutima gegenbauri voucher MHNG INVE31748 28S ribosomal RNA gene
								gb|KJ707240.1|	Eutima sp. SL-2014 isolate MCZIZ-25220b 18S ribosomal RNA gene
								gb|MT499122.1|	Glycera alba isolate GlycA_AL cytochrome c oxidase subunit I (COX1) gene
								gb|GQ426608.1|	Glycera lapidum 16S ribosomal RNA gene
								gb|GQ426661.1|	Glycera lapidum cytochrome oxidase subunit I (COI) gene
								gb|KT989348.1|	Glycera lapidum isolate FS07 18S ribosomal RNA gene
								gb|AF185176.1|	Glycera sp. AMW196835 28S ribosomal RNA gene
								gb|KR916832.1|	Glycera sp. BOLD:AAY5542 voucher SFP5 - 003 cytochrome oxidase subunit 1 (COI) gene
								gb|KT989347.1|	Glycera sp. SR-2015 18S ribosomal RNA gene
								gb|GQ426610.1|	Glycera tridactyla 16S ribosomal RNA gene
								gb|GQ426665.1|	Glycera tridactyla cytochrome oxidase subunit I (COI) gene
								gb|HM746756.1|	Glycera tridactyla histone H3 gene
								gb|KT989332.1|	Glycera tridactyla isolate Glytri 18S ribosomal RNA gene
								gb|KT989331.1|	Glycera tridactyla isolate Glytri mitochondrion
								gb|EU190774.1|	Haliplanella lineata 16S ribosomal RNA gene
								ref|NC_047218.1|	Haloclava producta mitochondrion
								emb|HG423146.1|	Hormathia digitata complete mitochondrial genome
								gb|KU197430.1|	Hubrechtella juliae isolate 79 16S ribosomal RNA gene
								gb|KU365698.1|	Hubrechtella juliae isolate E1H9 28S ribosomal RNA gene
								gb|KP270802.1|	Hubrechtella juliae voucher MCZ:IZ:45553 18S ribosomal RNA gene
								dbj|AB254943.1|	Jesogammarus spinopalpus mitochondrial gene for 28S rRNA
								gb|MH025768.1|	Limecola balthica clone AMNH-11F-S4M-1 retrotransposon Steamer-like element polyprotein (pol) gene
								gb|MH285592.1|	Limecola balthica isolate F-61-1 mitochondrion
								gb|MH285593.1|	Limecola balthica isolate M-61-1 mitochondrion
								ref|NC_046519.1|	Limecola balthica mitochondrion
								gb|MK839109.1|	Limecola balthica voucher WS576 small subunit ribosomal RNA gene
								gb|MK921904.1|	Limecola balthica voucher WS577 internal transcribed spacer 1
								gb|KP795929.1|	Liocarcinus marmoreus cytochrome oxidase subunit 1 (COI) gene
								gb|KP965201.1|	Liocarcinus marmoreus voucher SMF<DEU>:36275 histone H3 (H3) gene
								ref|NC_047221.1|	Liponema brevicornis mitochondrion
								gb|KY555059.1|	Loimia ramzega isolate MNHN-IA-TYPE 1789 16S ribosomal RNA gene
								emb|AM774553.1|	Lutraria lutraria partial 18S rRNA gene
								gb|KR084641.1|	Lutraria lutraria voucher MT04995 cytochrome oxidase subunit 1 (COI) gene
								gb|AY570554.1|	Macoma balthica 18S ribosomal RNA gene
								gb|EF035099.1|	Macoma balthica 18S ribosomal RNA gene
								gb|AF131004.1|	Macoma balthica 28S ribosomal RNA gene
								gb|KP978002.1|	Macoma balthica balthica voucher 10PROBE-105620.1_rerun internal transcribed spacer 2
								gb|KP978006.1|	Macoma balthica balthica voucher 10PROBE-106300_rerun internal transcribed spacer 2
								gb|KP977999.1|	Macoma balthica balthica voucher 11BIOAK-0422_rerun internal transcribed spacer 2
								gb|KP977970.1|	Macoma balthica balthica voucher 11BIOAK-0453_rerun internal transcribed spacer 2
								gb|KP977990.1|	Macoma balthica balthica voucher BIOUG14669-C06 internal transcribed spacer 2
								gb|KP977985.1|	Macoma balthica balthica voucher BIOUG14669-C08 internal transcribed spacer 2
								gb|GQ406063.1|	Macoma balthica clone b3-24 microsatellite sequence
								gb|EU676330.1|	Macoma balthica clone mac10 microsatellite sequence
								gb|EU676332.1|	Macoma balthica clone mac17 microsatellite sequence
								gb|EU676333.1|	Macoma balthica clone mac19 microsatellite sequence
								gb|EU676331.1|	Macoma balthica clone mac4 microsatellite sequence
								gb|EU676334.1|	Macoma balthica clone mac40 microsatellite sequence
								gb|EU676335.1|	Macoma balthica clone mac64 microsatellite sequence
								gb|EU676336.1|	Macoma balthica clone mac81 microsatellite sequence
								gb|EU676337.1|	Macoma balthica clone mac84 microsatellite sequence
								gb|EF044096.1|	Macoma balthica haplotype 34 cytochrome c oxidase subunit III (COX3) gene
								gb|EF044097.1|	Macoma balthica haplotype 35 cytochrome c oxidase subunit III (COX3) gene
								gb|EF044099.1|	Macoma balthica haplotype 37 cytochrome c oxidase subunit III (COX3) gene
								gb|EF044103.1|	Macoma balthica haplotype 41 cytochrome c oxidase subunit III (COX3) gene
								gb|EF044107.1|	Macoma balthica haplotype 45 cytochrome c oxidase subunit III (COX3) gene
								gb|EF044114.1|	Macoma balthica haplotype 52 cytochrome c oxidase subunit III (COX3) gene
								gb|EF044115.1|	Macoma balthica haplotype 53 cytochrome c oxidase subunit III (COX3) gene
								gb|KM373200.1|	Macoma balthica isolate A10 mitochondrion
								gb|KM373201.1|	Macoma balthica isolate A6 mitochondrion
								gb|KM373205.1|	Macoma balthica isolate F17 mitochondrion
								gb|KM373202.1|	Macoma balthica isolate M12 mitochondrion
								gb|EF105200.1|	Macoma balthica isolate Mac_ba7 18S ribosomal RNA gene
								gb|KM373204.1|	Macoma balthica isolate W20 mitochondrion
								gb|KM373203.1|	Macoma balthica isolate W4 mitochondrion
								emb|AM182265.1|	Macoma balthica partial 18S rRNA gene
								emb|AM774526.1|	Macoma balthica rubra partial 18S rRNA gene
								emb|AM779700.1|	Macoma balthica rubra partial 28S rRNA gene
								gb|KC429303.1|	Macoma balthica voucher BivAToL-186 16S ribosomal RNA gene
								gb|KC429501.1|	Macoma balthica voucher BivAToL-286 28S ribosomal RNA gene
								gb|KC429141.1|	Macoma balthica voucher BivAToL-286 cytochrome c oxidase subunit I (COI) gene
								gb|KR084760.1|	Macoma balthica voucher MT01647 cytochrome oxidase subunit 1 (COI) gene
								gb|MG935100.1|	Macoma calcarea voucher MollOvr 8609V cytochrome oxidase subunit 1 (COI) gene
								gb|MK921899.1|	Macoma calcarea voucher WS671 internal transcribed spacer 1
								dbj|AB746899.1|	Macoma contabulata gene for 28S ribosomal RNA
								gb|KF808165.1|	Magelona johnstoni cytochrome oxidase subunit 1 (COI) gene
								gb|U50969.1|	Magelona mirabilis 18S ribosomal RNA gene
								gb|KT726959.1|	Magelona mirabilis mitochondrion
								gb|AY345876.1|	Metridium senile 16S ribosomal RNA gene
								emb|HG423143.1|	Metridium senile complete mitochondrial genome
								gb|JF832988.1|	Metridium senile fimbriatum 18S ribosomal RNA gene
								gb|KT852257.1|	Metridium senile fimbriatum isolate MEFI 28S ribosomal RNA gene
								gb|KT852258.1|	Metridium senile isolate MET 28S ribosomal RNA gene
								gb|AF000023.1|	Metridium senile tRNA-Met
								gb|EF613237.1|	Moerella iridescens 18S ribosomal RNA gene
								gb|MF974376.1|	Mytilus sp. 1 SR-2017 isolate 2004_02M3 cytochrome c oxidase subunit I (COI) mRNA
								gb|GU179351.1|	Nephtys cirrosa voucher MB36000106 16S ribosomal RNA gene
								gb|GU179374.1|	Nephtys cirrosa voucher MB36000106 18S ribosomal RNA gene
								gb|GU179393.1|	Nephtys cirrosa voucher MB36000106 28S ribosomal RNA gene
								gb|GU179408.1|	Nephtys cirrosa voucher MB36000112 cytochrome oxidase subunit I (COI) gene
								gb|GU179376.1|	Nephtys ferruginea voucher CASIZ 170852 18S ribosomal RNA gene
								gb|GU179395.1|	Nephtys ferruginea voucher CASIZ 170852 28S ribosomal RNA gene
								gb|EU221665.1|	Nephtys hombergii isolate NEH061 from Greece 16S ribosomal RNA gene
								gb|KR916886.1|	Nephtys hombergii voucher LMBSAP16-001 cytochrome oxidase subunit 1 (COI) gene
								gb|GU179396.1|	Nephtys hombergii voucher MB36000118 28S ribosomal RNA gene
								gb|GU179354.1|	Nephtys hombergii voucher MB36000136 16S ribosomal RNA gene
								gb|KR916887.1|	Nephtys hombergii voucher SFP13 - 002 cytochrome oxidase subunit 1 (COI) gene
								gb|KY972376.1|	Nephtys sp. AB-2017 12S ribosomal RNA gene
								gb|HM473244.1|	Nephtys sp. CMC04 voucher BIOUG<CAN>:BAMPOL0336 28S ribosomal RNA gene
								gb|AY652507.1|	Ophiura albida 16S ribosomal RNA gene
								emb|AM404180.1|	Ophiura albida complete mitochondrial genome
								gb|KX459047.1|	Ophiura albida voucher MT03377 cytochrome oxidase subunit 1 (COI) gene
								gb|KX459044.1|	Ophiura albida voucher MT03380 cytochrome oxidase subunit 1 (COI) gene
								gb|KX459046.1|	Ophiura albida voucher MT03382 cytochrome oxidase subunit 1 (COI) gene
								gb|KX459078.1|	Ophiura ophiura voucher MT03604 cytochrome oxidase subunit 1 (COI) gene
								gb|AY176298.1|	Owenia fusiformis 18S ribosomal RNA gene
								gb|DQ790049.1|	Owenia fusiformis 28S large subunit ribosomal RNA gene
								gb|MF133502.1|	Owenia fusiformis ADP ribosylation factor 4 (Arf4) mRNA
								gb|KR232536.1|	Owenia fusiformis caudal mRNA
								gb|MT900912.1|	Owenia fusiformis Eya mRNA
								gb|KR232543.1|	Owenia fusiformis foxC mRNA
								gb|KR232537.1|	Owenia fusiformis GATA456-a mRNA
								dbj|AB106255.1|	Owenia fusiformis gene for 18S ribosomal RNA
								gb|MF988103.1|	Owenia fusiformis HB9 protein mRNA
								gb|AY428832.1|	Owenia fusiformis histone H3 gene
								gb|MT900904.1|	Owenia fusiformis Hunchback mRNA
								gb|DQ319199.1|	Owenia fusiformis isolate BEwk8 cytochrome c oxidase subunit I (COI) gene
								gb|DQ319226.1|	Owenia fusiformis isolate BV16 cytochrome c oxidase subunit I (COI) gene
								gb|DQ319230.1|	Owenia fusiformis isolate BV20 cytochrome c oxidase subunit I (COI) gene
								gb|KP113637.1|	Owenia fusiformis isolate D histone H3 (H3) gene
								gb|KJ405457.1|	Owenia fusiformis isolate OwfuCS3 chitin synthase mRNA
								gb|KJ405459.1|	Owenia fusiformis isolate OwfuCS5 chitin synthase mRNA
								gb|MT900906.1|	Owenia fusiformis Lhx1/5b mRNA
								gb|KT726960.1|	Owenia fusiformis mitochondrion
								gb|KY809735.1|	Owenia fusiformis NK2.2 mRNA
								gb|MT900909.1|	Owenia fusiformis OsrA mRNA
								gb|KY809738.1|	Owenia fusiformis PAX3/7 mRNA
								gb|KY809737.1|	Owenia fusiformis PAX6 mRNA
								gb|KU885445.1|	Owenia fusiformis PITX mRNA
								gb|MT900911.1|	Owenia fusiformis POU3 mRNA
								gb|MT900902.1|	Owenia fusiformis Six1/2 mRNA
								gb|KR232531.1|	Owenia fusiformis six3/6 mRNA
								gb|KR232532.1|	Owenia fusiformis twist mRNA
								gb|AF185200.1|	Owenia fusiformis U2 small nuclear RNA
								gb|KP119583.1|	Owenia fusiformis voucher SIO-BIC A1011 28S ribosomal RNA gene
								gb|MT900901.1|	Owenia fusiformis ZO1 mRNA
								gb|AF425314.1|	Pagurus bernhardus 12S ribosomal RNA gene
								gb|KF715875.1|	Paracalanus parvus voucher V082.NEA1a cytochrome oxidase subunit I gene
								dbj|LC159109.1|	Paracalanus sp. PAPA1 gene for 28S ribosomal RNA
								gb|MG254437.1|	Phyllodoce mucosa voucher SMNH 124080 16S ribosomal RNA gene
								gb|DQ343272.1|	Pinnotheres pisum 12S ribosomal RNA gene
								emb|AM180694.2|	Pinnotheres pisum mitochondrial partial 16S rRNA gene
								gb|MG935291.1|	Pinnotheres pisum voucher Crust 18685V cytochrome oxidase subunit 1 (COI) gene
								gb|MF138913.1|	Pinnotheres sp. IEO-CD-ECOB/1927 histone H3 (H3) gene
								emb|FR682470.1|	Pisidia longicornis mitochondrial partial 16S rRNA gene
								gb|KT209357.1|	Pisidia longicornis voucher MT04045 cytochrome oxidase subunit 1 (COI) gene
								gb|KU560484.1|	Polybius henslowii voucher SMF<DEU>:32759 16S ribosomal RNA gene
								gb|KP965200.1|	Polybius henslowii voucher SMF<DEU>:32759 histone H3 (H3) gene
								gb|EU418872.1|	Polygordius appendicularis 28S ribosomal RNA gene
								gb|MG603502.1|	Polygordius appendiculatus isolate H1_52 16S ribosomal RNA gene
								gb|MG603446.1|	Polygordius appendiculatus isolate H2_16 cytochrome oxidase subunit I (COI) gene
								gb|MG603481.1|	Polygordius appendiculatus isolate H2_9 16S ribosomal RNA gene
								gb|MH128699.1|	Polygordius appendiculatus voucher SMF21747 internal transcribed spacer 1
								ref|XR_004196745.1|	PREDICTED: Actinia tenebrosa 5S ribosomal RNA (LOC116292939)
								ref|XM_031712990.1|	PREDICTED: Actinia tenebrosa ADP-ribosylation factor-like protein 3 (LOC116303450)
								ref|XM_031705008.1|	PREDICTED: Actinia tenebrosa casein kinase II subunit alpha-like (LOC116296898)
								ref|XM_031717300.1|	PREDICTED: Actinia tenebrosa cell adhesion molecule-related/down-regulated by oncogenes-like (LOC116307146)
								ref|XM_031709668.1|	PREDICTED: Actinia tenebrosa cleavage and polyadenylation specificity factor subunit 6-like (LOC116300745)
								ref|XM_031716693.1|	PREDICTED: Actinia tenebrosa dapdiamide synthesis protein DdaC-like (LOC116306607)
								ref|XM_031717908.1|	PREDICTED: Actinia tenebrosa fibrillin-2-like (LOC116307635)
								ref|XM_031699581.1|	PREDICTED: Actinia tenebrosa fibrinogen C domain-containing protein 1-like (LOC116292298)
								ref|XM_031697896.1|	PREDICTED: Actinia tenebrosa geminin-like (LOC116290787)
								ref|XM_031713497.1|	PREDICTED: Actinia tenebrosa hemicentin-1-like (LOC116303885)
								ref|XM_031700047.1|	PREDICTED: Actinia tenebrosa hemicentin-2-like (LOC116292694)
								ref|XM_031694387.1|	PREDICTED: Actinia tenebrosa keratin-associated protein 10-5-like (LOC116287704)
								ref|XM_031718666.1|	PREDICTED: Actinia tenebrosa kinetochore scaffold 1-like (LOC116308276)
								ref|XM_031713825.1|	PREDICTED: Actinia tenebrosa lissencephaly-1 homolog (LOC116304151)
								ref|XM_031718760.1|	PREDICTED: Actinia tenebrosa mitochondrial ribosome-associated GTPase 1-like (LOC116308356)
								ref|XM_031706511.1|	PREDICTED: Actinia tenebrosa MOB-like protein phocein (LOC116298135)
								ref|XM_031699538.1|	PREDICTED: Actinia tenebrosa NACHT
								ref|XM_031711517.1|	PREDICTED: Actinia tenebrosa nuclear cap-binding protein subunit 2-like (LOC116302279)
								ref|XM_031715125.1|	PREDICTED: Actinia tenebrosa octopamine receptor beta-2R-like (LOC116305255)
								ref|XM_031710066.1|	PREDICTED: Actinia tenebrosa phytanoyl-CoA dioxygenase domain-containing protein 1 homolog (LOC116301065)
								ref|XM_031703388.1|	PREDICTED: Actinia tenebrosa protein BTN1-like (LOC116295540)
								ref|XM_031714229.1|	PREDICTED: Actinia tenebrosa protein CLP1 homolog (LOC116304488)
								ref|XM_031697488.1|	PREDICTED: Actinia tenebrosa protein dispatched homolog 1-like (LOC116290459)
								ref|XM_031701323.1|	PREDICTED: Actinia tenebrosa protein lin-7 homolog C-like (LOC116293840)
								ref|XM_031695310.1|	PREDICTED: Actinia tenebrosa putative ribosome-binding factor A
								ref|XM_031715991.1|	PREDICTED: Actinia tenebrosa QRFP-like peptide receptor (LOC116305979)
								ref|XM_031704986.1|	PREDICTED: Actinia tenebrosa ran-specific GTPase-activating protein-like (LOC116296877)
								ref|XM_031713025.1|	PREDICTED: Actinia tenebrosa rho guanine nucleotide exchange factor 7-like (LOC116303476)
								ref|XM_031704406.1|	PREDICTED: Actinia tenebrosa serine palmitoyltransferase 2-like (LOC116296392)
								ref|XM_031708477.1|	PREDICTED: Actinia tenebrosa sodium- and chloride-dependent GABA transporter 1-like (LOC116299755)
								ref|XM_031694306.1|	PREDICTED: Actinia tenebrosa sorting nexin-10-like (LOC116287622)
								ref|XM_031695267.1|	PREDICTED: Actinia tenebrosa transmembrane protein 131-like (LOC116288472)
								ref|XM_031715772.1|	PREDICTED: Actinia tenebrosa transmembrane protein 72-like (LOC116305799)
								ref|XM_031716106.1|	PREDICTED: Actinia tenebrosa transmembrane protein with metallophosphoesterase domain-like (LOC116306074)
								ref|XM_031714711.1|	PREDICTED: Actinia tenebrosa trimethyllysine dioxygenase
								ref|XR_004196195.1|	PREDICTED: Actinia tenebrosa U1 spliceosomal RNA (LOC116288535)
								ref|XR_004196545.1|	PREDICTED: Actinia tenebrosa U1 spliceosomal RNA (LOC116291066)
								ref|XR_004196196.1|	PREDICTED: Actinia tenebrosa U2 spliceosomal RNA (LOC116288537)
								ref|XR_004196788.1|	PREDICTED: Actinia tenebrosa U4 spliceosomal RNA (LOC116293244)
								ref|XR_004197148.1|	PREDICTED: Actinia tenebrosa U4 spliceosomal RNA (LOC116296646)
								ref|XR_004198163.1|	PREDICTED: Actinia tenebrosa U4 spliceosomal RNA (LOC116305396)
								ref|XR_004198164.1|	PREDICTED: Actinia tenebrosa U4 spliceosomal RNA (LOC116305397)
								ref|XR_004198165.1|	PREDICTED: Actinia tenebrosa U4 spliceosomal RNA (LOC116305398)
								ref|XR_004198318.1|	PREDICTED: Actinia tenebrosa U4 spliceosomal RNA (LOC116306787)
								ref|XR_004196873.1|	PREDICTED: Actinia tenebrosa U5 spliceosomal RNA (LOC116293940)
								ref|XR_004198157.1|	PREDICTED: Actinia tenebrosa U5 spliceosomal RNA (LOC116305332)
								ref|XR_004197526.1|	PREDICTED: Actinia tenebrosa U6atac minor spliceosomal RNA (LOC116299857)
								ref|XR_004195955.1|	PREDICTED: Actinia tenebrosa uncharacterized LOC116286360 (LOC116286360)
								ref|XM_031693545.1|	PREDICTED: Actinia tenebrosa uncharacterized LOC116286945 (LOC116286945)
								ref|XM_031695333.1|	PREDICTED: Actinia tenebrosa uncharacterized LOC116288524 (LOC116288524)
								ref|XM_031695568.1|	PREDICTED: Actinia tenebrosa uncharacterized LOC116288743 (LOC116288743)
								ref|XM_031696010.1|	PREDICTED: Actinia tenebrosa uncharacterized LOC116289134 (LOC116289134)
								ref|XM_031696062.1|	PREDICTED: Actinia tenebrosa uncharacterized LOC116289185 (LOC116289185)
								ref|XR_004196344.1|	PREDICTED: Actinia tenebrosa uncharacterized LOC116289575 (LOC116289575)
								ref|XM_031697063.1|	PREDICTED: Actinia tenebrosa uncharacterized LOC116290083 (LOC116290083)
								ref|XM_031697473.1|	PREDICTED: Actinia tenebrosa uncharacterized LOC116290444 (LOC116290444)
								ref|XM_031697656.1|	PREDICTED: Actinia tenebrosa uncharacterized LOC116290587 (LOC116290587)
								ref|XR_004196605.1|	PREDICTED: Actinia tenebrosa uncharacterized LOC116291678 (LOC116291678)
								ref|XM_031698931.1|	PREDICTED: Actinia tenebrosa uncharacterized LOC116291722 (LOC116291722)
								ref|XM_031699552.1|	PREDICTED: Actinia tenebrosa uncharacterized LOC116292271 (LOC116292271)
								ref|XR_004196794.1|	PREDICTED: Actinia tenebrosa uncharacterized LOC116293279 (LOC116293279)
								ref|XM_031702476.1|	PREDICTED: Actinia tenebrosa uncharacterized LOC116294814 (LOC116294814)
								ref|XM_031703844.1|	PREDICTED: Actinia tenebrosa uncharacterized LOC116295851 (LOC116295851)
								ref|XM_031704233.1|	PREDICTED: Actinia tenebrosa uncharacterized LOC116296239 (LOC116296239)
								ref|XM_031705210.1|	PREDICTED: Actinia tenebrosa uncharacterized LOC116297063 (LOC116297063)
								ref|XM_031705949.1|	PREDICTED: Actinia tenebrosa uncharacterized LOC116297676 (LOC116297676)
								ref|XM_031706083.1|	PREDICTED: Actinia tenebrosa uncharacterized LOC116297787 (LOC116297787)
								ref|XM_031709364.1|	PREDICTED: Actinia tenebrosa uncharacterized LOC116300488 (LOC116300488)
								ref|XM_031711277.1|	PREDICTED: Actinia tenebrosa uncharacterized LOC116302080 (LOC116302080)
								ref|XR_004198109.1|	PREDICTED: Actinia tenebrosa uncharacterized LOC116304870 (LOC116304870)
								ref|XM_031715444.1|	PREDICTED: Actinia tenebrosa uncharacterized LOC116305508 (LOC116305508)
								ref|XM_031716218.1|	PREDICTED: Actinia tenebrosa uncharacterized LOC116306170 (LOC116306170)
								ref|XM_031716508.1|	PREDICTED: Actinia tenebrosa uncharacterized LOC116306441 (LOC116306441)
								ref|XM_031716609.1|	PREDICTED: Actinia tenebrosa uncharacterized LOC116306527 (LOC116306527)
								ref|XR_004198297.1|	PREDICTED: Actinia tenebrosa uncharacterized LOC116306537 (LOC116306537)
								ref|XM_031717286.1|	PREDICTED: Actinia tenebrosa uncharacterized LOC116307132 (LOC116307132)
								ref|XR_004198491.1|	PREDICTED: Actinia tenebrosa uncharacterized LOC116308278 (LOC116308278)
								ref|XM_031719537.1|	PREDICTED: Actinia tenebrosa uncharacterized LOC116309014 (LOC116309014)
								ref|XM_031715009.1|	PREDICTED: Actinia tenebrosa von Willebrand factor D and EGF domain-containing protein-like (LOC116305158)
								ref|XM_031709265.1|	PREDICTED: Actinia tenebrosa zinc finger protein 862-like (LOC116300392)
								ref|XM_031718630.1|	PREDICTED: Actinia tenebrosa zinc finger protein with KRAB and SCAN domains 7-like (LOC116308247)
								ref|XM_021050328.2|	PREDICTED: Exaiptasia pallida 1-phosphatidylinositol 4
								ref|XM_021051091.2|	PREDICTED: Exaiptasia pallida 40S ribosomal protein S5 (LOC110244863)
								ref|XM_021041400.2|	PREDICTED: Exaiptasia pallida 5'-AMP-activated protein kinase subunit beta-2 (LOC110235926)
								ref|XR_003695302.1|	PREDICTED: Exaiptasia pallida 5S ribosomal RNA (LOC114574797)
								ref|XM_021061431.2|	PREDICTED: Exaiptasia pallida 60S ribosomal protein L6 (LOC110254450)
								ref|XM_021057510.2|	PREDICTED: Exaiptasia pallida ABC transporter B family member 25 (LOC110250869)
								ref|XM_021044135.2|	PREDICTED: Exaiptasia pallida adenosine receptor A3-like (LOC110238462)
								ref|XM_021059368.2|	PREDICTED: Exaiptasia pallida amino acid transporter AVT3B (LOC110252545)
								ref|XM_021061414.2|	PREDICTED: Exaiptasia pallida amyloid protein-binding protein 2-like (LOC110254431)
								ref|XM_028660083.1|	PREDICTED: Exaiptasia pallida androglobin (LOC110242419)
								ref|XM_021050517.2|	PREDICTED: Exaiptasia pallida apocarotenoid-15
								ref|XM_021039138.2|	PREDICTED: Exaiptasia pallida arginine kinase (LOC110233807)
								ref|XM_021057686.2|	PREDICTED: Exaiptasia pallida arginine kinase (LOC110251023)
								ref|XM_021049773.2|	PREDICTED: Exaiptasia pallida ATP synthase lipid-binding protein
								ref|XM_021062000.1|	PREDICTED: Exaiptasia pallida ATP-dependent Clp protease ATP-binding subunit clpX-like
								ref|XM_021049425.2|	PREDICTED: Exaiptasia pallida beta-adrenergic receptor kinase 2 (LOC110243336)
								ref|XM_021053118.2|	PREDICTED: Exaiptasia pallida beta-arrestin-1 (LOC110246756)
								ref|XM_028659300.1|	PREDICTED: Exaiptasia pallida beta-TrCP (LOC110239842)
								ref|XM_021054761.2|	PREDICTED: Exaiptasia pallida bromodomain-containing protein 3 (LOC110248257)
								ref|XM_021050585.2|	PREDICTED: Exaiptasia pallida caltractin (LOC110244380)
								ref|XM_021037504.2|	PREDICTED: Exaiptasia pallida cAMP-responsive element modulator (LOC110232327)
								ref|XM_021053490.2|	PREDICTED: Exaiptasia pallida CCR4-NOT transcription complex subunit 4 (LOC110246769)
								ref|XM_021045876.2|	PREDICTED: Exaiptasia pallida ceramide synthase 1 (LOC110240089)
								ref|XM_028658347.1|	PREDICTED: Exaiptasia pallida cilia- and flagella-associated protein 20 (LOC110236574)
								ref|XM_021041570.2|	PREDICTED: Exaiptasia pallida cullin-4A (LOC110236089)
								ref|XM_021054285.2|	PREDICTED: Exaiptasia pallida cyclic AMP-responsive element-binding protein 3-like protein 2 (LOC110247812)
								ref|XM_021059444.2|	PREDICTED: Exaiptasia pallida cyclin-I (LOC110252605)
								ref|XM_021054790.2|	PREDICTED: Exaiptasia pallida cytosolic 5'-nucleotidase 3 (LOC110248278)
								ref|XM_028660903.1|	PREDICTED: Exaiptasia pallida dual 3'
								ref|XM_028659640.1|	PREDICTED: Exaiptasia pallida E3 ubiquitin-protein ligase TRIM71 (LOC110240947)
								ref|XM_021057945.2|	PREDICTED: Exaiptasia pallida eukaryotic peptide chain release factor subunit 1 (LOC110251252)
								ref|XM_021048978.1|	PREDICTED: Exaiptasia pallida eukaryotic translation initiation factor 3 subunit D (LOC110242929)
								ref|XM_021038000.2|	PREDICTED: Exaiptasia pallida eukaryotic translation initiation factor 4 gamma 2 (LOC110232785)
								ref|XM_028659571.1|	PREDICTED: Exaiptasia pallida eyes absent homolog 1 (LOC110240708)
								ref|XM_021051178.2|	PREDICTED: Exaiptasia pallida factor VIII intron 22 protein (LOC110244943)
								ref|XM_021038004.2|	PREDICTED: Exaiptasia pallida FGFR1 oncogene partner 2 homolog (LOC110232788)
								ref|XM_028662981.1|	PREDICTED: Exaiptasia pallida fibrillin-3 (LOC110251624)
								ref|XM_021049266.2|	PREDICTED: Exaiptasia pallida forkhead box protein B1 (LOC110243187)
								ref|XM_028663093.1|	PREDICTED: Exaiptasia pallida G-protein coupled receptor GRL101-like (LOC110251994)
								ref|XM_021050192.2|	PREDICTED: Exaiptasia pallida G-protein coupled receptor Mth2-like (LOC110244033)
								ref|XM_021038943.2|	PREDICTED: Exaiptasia pallida gametogenetin-binding protein 2 (LOC110233632)
								ref|XM_021047947.2|	PREDICTED: Exaiptasia pallida gamma-tubulin complex component 3 homolog (LOC110242018)
								ref|XM_021054357.2|	PREDICTED: Exaiptasia pallida guanine nucleotide-binding protein G(i) subunit alpha (LOC110247870)
								ref|XM_021037606.2|	PREDICTED: Exaiptasia pallida guanine nucleotide-binding protein G(o) subunit alpha (LOC110232413)
								ref|XM_021055319.2|	PREDICTED: Exaiptasia pallida guanine nucleotide-binding protein G(s) subunit alpha (LOC110248771)
								ref|XM_021042884.1|	PREDICTED: Exaiptasia pallida hemicentin-1 (LOC110237293)
								ref|XM_021038218.2|	PREDICTED: Exaiptasia pallida heterogeneous nuclear ribonucleoprotein F (LOC110232978)
								ref|XM_021049257.2|	PREDICTED: Exaiptasia pallida high affinity cAMP-specific and IBMX-insensitive 3'
								ref|XM_021049258.2|	PREDICTED: Exaiptasia pallida high affinity cAMP-specific and IBMX-insensitive 3'
								ref|XM_021050924.2|	PREDICTED: Exaiptasia pallida histone H2A-like (LOC110244713)
								ref|XM_021041141.2|	PREDICTED: Exaiptasia pallida histone H2B (LOC110235665)
								ref|XM_021050927.2|	PREDICTED: Exaiptasia pallida histone H2B (LOC110244717)
								ref|XM_021057460.2|	PREDICTED: Exaiptasia pallida histone H2B (LOC110250822)
								ref|XM_021062008.1|	PREDICTED: Exaiptasia pallida histone H2B (LOC110254953)
								ref|XM_021041268.2|	PREDICTED: Exaiptasia pallida histone H2B-like (LOC110235773)
								ref|XM_021050923.2|	PREDICTED: Exaiptasia pallida histone H3 (LOC110244712)
								ref|XM_021051674.2|	PREDICTED: Exaiptasia pallida histone H4 (LOC110245395)
								ref|XM_021060604.2|	PREDICTED: Exaiptasia pallida histone H4 (LOC110253655)
								ref|XM_021036983.2|	PREDICTED: Exaiptasia pallida homeobox protein Meis1 (LOC110231912)
								ref|XM_021052665.2|	PREDICTED: Exaiptasia pallida homeobox protein OTX (LOC110246334)
								ref|XM_021051229.2|	PREDICTED: Exaiptasia pallida homeobox protein XENK-2 (LOC110244983)
								ref|XM_021054065.2|	PREDICTED: Exaiptasia pallida host cell factor 2 (LOC110247606)
								ref|XM_021052437.2|	PREDICTED: Exaiptasia pallida integrator complex subunit 6-B (LOC110246124)
								ref|XM_021057872.2|	PREDICTED: Exaiptasia pallida intraflagellar transport protein 80 homolog (LOC110251196)
								ref|XM_021057191.2|	PREDICTED: Exaiptasia pallida low-density lipoprotein receptor-related protein 2-like (LOC110250588)
								ref|XM_028658068.1|	PREDICTED: Exaiptasia pallida MAP/microtubule affinity-regulating kinase 3 (LOC110235688)
								ref|XM_021044505.2|	PREDICTED: Exaiptasia pallida MAPK/MAK/MRK overlapping kinase (LOC110238823)
								ref|XM_021044269.2|	PREDICTED: Exaiptasia pallida max-interacting protein 1 (LOC110238586)
								ref|XM_021054945.2|	PREDICTED: Exaiptasia pallida microtubule-actin cross-linking factor 1
								ref|XM_028659919.1|	PREDICTED: Exaiptasia pallida motile sperm domain-containing protein 2 (LOC110241943)
								ref|XM_021058867.2|	PREDICTED: Exaiptasia pallida multiple inositol polyphosphate phosphatase 1 (LOC110252104)
								ref|XR_002334691.2|	PREDICTED: Exaiptasia pallida myosin heavy chain
								ref|XM_021045748.2|	PREDICTED: Exaiptasia pallida nuclear distribution protein nudE-like 1-B (LOC110239979)
								ref|XM_021053851.2|	PREDICTED: Exaiptasia pallida nuclear respiratory factor 1 (LOC110247423)
								ref|XM_021040464.2|	PREDICTED: Exaiptasia pallida oxysterol-binding protein 1 (LOC110235046)
								ref|XM_021054518.2|	PREDICTED: Exaiptasia pallida paired box protein Pax-6 (LOC110248033)
								ref|XM_021043625.2|	PREDICTED: Exaiptasia pallida pentatricopeptide repeat domain-containing protein 3
								ref|XM_028663160.1|	PREDICTED: Exaiptasia pallida peroxisomal sarcosine oxidase (LOC110252228)
								ref|XM_021039044.2|	PREDICTED: Exaiptasia pallida phospholipase D3 (LOC110233726)
								ref|XM_028663904.1|	PREDICTED: Exaiptasia pallida potassium channel subfamily K member 15 (LOC110254705)
								ref|XM_028660805.1|	PREDICTED: Exaiptasia pallida protein sidekick (LOC110244926)
								ref|XM_021038256.2|	PREDICTED: Exaiptasia pallida protein transport protein Sec24C (LOC110233014)
								ref|XM_021056941.2|	PREDICTED: Exaiptasia pallida putative sodium-coupled neutral amino acid transporter 7 (LOC110250340)
								ref|XM_021049861.1|	PREDICTED: Exaiptasia pallida ras GTPase-activating protein-binding protein 1 (LOC110243734)
								ref|XM_021049075.2|	PREDICTED: Exaiptasia pallida ras-like GTP-binding protein RHO (LOC110243025)
								ref|XM_021053346.2|	PREDICTED: Exaiptasia pallida ras-like protein RAS2 (LOC110246963)
								ref|XM_021039295.2|	PREDICTED: Exaiptasia pallida ras-related protein Rab-1A (LOC110233959)
								ref|XM_021043182.2|	PREDICTED: Exaiptasia pallida regulating synaptic membrane exocytosis protein 2 (LOC110237578)
								ref|XM_021043029.2|	PREDICTED: Exaiptasia pallida REST corepressor 3 (LOC110237440)
								ref|XM_021038247.2|	PREDICTED: Exaiptasia pallida rhodopsin
								ref|XM_021053600.2|	PREDICTED: Exaiptasia pallida ribokinase (LOC110247195)
								ref|XM_021054816.2|	PREDICTED: Exaiptasia pallida septin-6 (LOC110248299)
								ref|XM_021054870.2|	PREDICTED: Exaiptasia pallida serine--pyruvate aminotransferase (LOC110248353)
								ref|XM_021057797.2|	PREDICTED: Exaiptasia pallida serine/threonine-protein kinase PAK 3 (LOC110251135)
								ref|XM_021051572.2|	PREDICTED: Exaiptasia pallida serine/threonine-protein kinase WNK4 (LOC110245284)
								ref|XM_021057796.2|	PREDICTED: Exaiptasia pallida serine/threonine-protein phosphatase 2A 65 kDa regulatory subunit A alpha isoform (LOC110251134)
								ref|XM_021043976.2|	PREDICTED: Exaiptasia pallida sodium channel protein 1 brain (LOC110238311)
								ref|XM_021058392.2|	PREDICTED: Exaiptasia pallida sodium- and chloride-dependent GABA transporter 2 (LOC110251663)
								ref|XM_021060020.2|	PREDICTED: Exaiptasia pallida SUMO-conjugating enzyme UBC9-B (LOC110253145)
								ref|XM_021059708.1|	PREDICTED: Exaiptasia pallida tetratricopeptide repeat protein 8 (LOC110252855)
								ref|XM_021043487.1|	PREDICTED: Exaiptasia pallida tigger transposable element-derived protein 4 (LOC110237864)
								ref|XM_028660570.1|	PREDICTED: Exaiptasia pallida transcription factor Sp9 (LOC110244147)
								ref|XM_021050751.2|	PREDICTED: Exaiptasia pallida transcriptional repressor p66 alpha (LOC110244546)
								ref|XM_021060532.2|	PREDICTED: Exaiptasia pallida transducin-like enhancer protein 1 (LOC110253595)
								ref|XM_021061978.2|	PREDICTED: Exaiptasia pallida transducin-like enhancer protein 3-B (LOC110254922)
								ref|XM_021046348.1|	PREDICTED: Exaiptasia pallida transmembrane protein 131 (LOC110240537)
								ref|XM_028657400.1|	PREDICTED: Exaiptasia pallida transmembrane protein with metallophosphoesterase domain-like (LOC110233436)
								ref|XM_021050038.2|	PREDICTED: Exaiptasia pallida tRNA (guanine(10)-N2)-methyltransferase homolog (LOC110243885)
								ref|XM_021057850.2|	PREDICTED: Exaiptasia pallida tubulin beta-4B chain (LOC110251177)
								ref|XR_003695859.1|	PREDICTED: Exaiptasia pallida U1 spliceosomal RNA (LOC114576053)
								ref|XR_003696040.1|	PREDICTED: Exaiptasia pallida U1 spliceosomal RNA (LOC114576427)
								ref|XR_003696048.1|	PREDICTED: Exaiptasia pallida U2 spliceosomal RNA (LOC114576438)
								ref|XR_003695130.1|	PREDICTED: Exaiptasia pallida U4 spliceosomal RNA (LOC114574550)
								ref|XR_003695520.1|	PREDICTED: Exaiptasia pallida U4 spliceosomal RNA (LOC114575244)
								ref|XR_003695131.1|	PREDICTED: Exaiptasia pallida U5 spliceosomal RNA (LOC114574551)
								ref|XR_003696161.1|	PREDICTED: Exaiptasia pallida U5 spliceosomal RNA (LOC114576704)
								ref|XR_003696162.1|	PREDICTED: Exaiptasia pallida U5 spliceosomal RNA (LOC114576705)
								ref|XR_003696163.1|	PREDICTED: Exaiptasia pallida U5 spliceosomal RNA (LOC114576706)
								ref|XR_003695047.1|	PREDICTED: Exaiptasia pallida U6 spliceosomal RNA (LOC114574380)
								ref|XR_003695364.1|	PREDICTED: Exaiptasia pallida U6 spliceosomal RNA (LOC114574955)
								ref|XM_021037089.2|	PREDICTED: Exaiptasia pallida ubiquitin-conjugating enzyme E2-17 kDa (LOC110232007)
								ref|XM_021058813.1|	PREDICTED: Exaiptasia pallida UDP-glucuronosyltransferase 2A3 (LOC110252050)
								ref|XM_021036698.2|	PREDICTED: Exaiptasia pallida uncharacterized LOC110231662 (LOC110231662)
								ref|XM_021037107.2|	PREDICTED: Exaiptasia pallida uncharacterized LOC110232020 (LOC110232020)
								ref|XM_021039721.2|	PREDICTED: Exaiptasia pallida uncharacterized LOC110234347 (LOC110234347)
								ref|XM_021039726.2|	PREDICTED: Exaiptasia pallida uncharacterized LOC110234351 (LOC110234351)
								ref|XM_021039843.1|	PREDICTED: Exaiptasia pallida uncharacterized LOC110234463 (LOC110234463)
								ref|XM_028657687.1|	PREDICTED: Exaiptasia pallida uncharacterized LOC110234486 (LOC110234486)
								ref|XM_021040133.2|	PREDICTED: Exaiptasia pallida uncharacterized LOC110234745 (LOC110234745)
								ref|XM_021040910.1|	PREDICTED: Exaiptasia pallida uncharacterized LOC110235447 (LOC110235447)
								ref|XM_021042562.2|	PREDICTED: Exaiptasia pallida uncharacterized LOC110236993 (LOC110236993)
								ref|XM_021042979.2|	PREDICTED: Exaiptasia pallida uncharacterized LOC110237396 (LOC110237396)
								ref|XM_021043978.2|	PREDICTED: Exaiptasia pallida uncharacterized LOC110238312 (LOC110238312)
								ref|XM_028658855.1|	PREDICTED: Exaiptasia pallida uncharacterized LOC110238319 (LOC110238319)
								ref|XM_021044444.2|	PREDICTED: Exaiptasia pallida uncharacterized LOC110238760 (LOC110238760)
								ref|XR_002334724.2|	PREDICTED: Exaiptasia pallida uncharacterized LOC110240750 (LOC110240750)
								ref|XM_028660646.1|	PREDICTED: Exaiptasia pallida uncharacterized LOC110244407 (LOC110244407)
								ref|XR_002334935.2|	PREDICTED: Exaiptasia pallida uncharacterized LOC110245039 (LOC110245039)
								ref|XM_021052545.2|	PREDICTED: Exaiptasia pallida uncharacterized LOC110246228 (LOC110246228)
								ref|XM_021052987.2|	PREDICTED: Exaiptasia pallida uncharacterized LOC110246623 (LOC110246623)
								ref|XM_021053404.1|	PREDICTED: Exaiptasia pallida uncharacterized LOC110247018 (LOC110247018)
								ref|XM_021054020.2|	PREDICTED: Exaiptasia pallida uncharacterized LOC110247564 (LOC110247564)
								ref|XM_021055345.2|	PREDICTED: Exaiptasia pallida uncharacterized LOC110248789 (LOC110248789)
								ref|XM_021056115.2|	PREDICTED: Exaiptasia pallida uncharacterized LOC110249539 (LOC110249539)
								ref|XM_021056855.2|	PREDICTED: Exaiptasia pallida uncharacterized LOC110250252 (LOC110250252)
								ref|XM_021057339.1|	PREDICTED: Exaiptasia pallida uncharacterized LOC110250724 (LOC110250724)
								ref|XM_021057781.2|	PREDICTED: Exaiptasia pallida uncharacterized LOC110251120 (LOC110251120)
								ref|XM_028662901.1|	PREDICTED: Exaiptasia pallida uncharacterized LOC110251409 (LOC110251409)
								ref|XM_028663150.1|	PREDICTED: Exaiptasia pallida uncharacterized LOC110252056 (LOC110252056)
								ref|XM_021059283.2|	PREDICTED: Exaiptasia pallida uncharacterized LOC110252453 (LOC110252453)
								ref|XM_021060694.2|	PREDICTED: Exaiptasia pallida uncharacterized LOC110253742 (LOC110253742)
								ref|XM_021061089.2|	PREDICTED: Exaiptasia pallida uncharacterized LOC110254127 (LOC110254127)
								ref|XM_021061847.2|	PREDICTED: Exaiptasia pallida uncharacterized LOC110254803 (LOC110254803)
								ref|XM_028657682.1|	PREDICTED: Exaiptasia pallida uncharacterized LOC114574605 (LOC114574605)
								ref|XM_028658617.1|	PREDICTED: Exaiptasia pallida uncharacterized LOC114574908 (LOC114574908)
								ref|XR_003695390.1|	PREDICTED: Exaiptasia pallida uncharacterized LOC114575000 (LOC114575000)
								ref|XR_003695842.1|	PREDICTED: Exaiptasia pallida uncharacterized LOC114576016 (LOC114576016)
								ref|XM_028659373.1|	PREDICTED: Exaiptasia pallida uncharacterized protein K02A2.6 (LOC110240067)
								ref|XM_028662842.1|	PREDICTED: Exaiptasia pallida uncharacterized protein K02A2.6-like (LOC110251239)
								ref|XM_021054770.1|	PREDICTED: Exaiptasia pallida uncharacterized protein K02A2.6-like (LOC114574177)
								ref|XM_021046705.2|	PREDICTED: Exaiptasia pallida upstream stimulatory factor 1 (LOC110240885)
								ref|XM_021061595.2|	PREDICTED: Exaiptasia pallida vegetative cell wall protein gp1 (LOC110254587)
								ref|XM_021037082.2|	PREDICTED: Exaiptasia pallida voltage-dependent anion-selective channel protein 2 (LOC110232000)
								ref|XM_028661566.1|	PREDICTED: Exaiptasia pallida WD repeat-containing protein 26 (LOC110247299)
								ref|XM_028660854.1|	PREDICTED: Exaiptasia pallida zinc finger CCCH domain-containing protein 13 (LOC110245031)
								ref|XM_021056495.2|	PREDICTED: Exaiptasia pallida zinc transporter 5-like (LOC110249917)
								ref|XM_021048618.2|	PREDICTED: Exaiptasia pallida zinc transporter ZIP11 (LOC110242605)
								ref|XM_027198581.1|	PREDICTED: Pocillopora damicornis mitochondrial import inner membrane translocase subunit TIM50-like (LOC113681491)
								ref|XR_003446841.1|	PREDICTED: Pocillopora damicornis U4 spliceosomal RNA (LOC113678050)
								ref|XR_003446316.1|	PREDICTED: Pocillopora damicornis U6atac minor spliceosomal RNA (LOC113672245)
								ref|XM_037233423.1|	PREDICTED: Pollicipes pollicipes dynein light chain 2
								ref|XR_003097302.1|	PREDICTED: Pomacea canaliculata 5S ribosomal RNA (LOC112554737)
								ref|XR_003097572.1|	PREDICTED: Pomacea canaliculata 5S ribosomal RNA (LOC112555972)
								ref|XR_003097588.1|	PREDICTED: Pomacea canaliculata 5S ribosomal RNA (LOC112555993)
								ref|XR_003097590.1|	PREDICTED: Pomacea canaliculata 5S ribosomal RNA (LOC112555995)
								ref|XR_003099037.1|	PREDICTED: Pomacea canaliculata 5S ribosomal RNA (LOC112563403)
								ref|XR_003099038.1|	PREDICTED: Pomacea canaliculata 5S ribosomal RNA (LOC112563404)
								ref|XR_003099412.1|	PREDICTED: Pomacea canaliculata 5S ribosomal RNA (LOC112565463)
								ref|XR_003100512.1|	PREDICTED: Pomacea canaliculata 5S ribosomal RNA (LOC112569701)
								ref|XR_003100524.1|	PREDICTED: Pomacea canaliculata 5S ribosomal RNA (LOC112569717)
								ref|XR_003101121.1|	PREDICTED: Pomacea canaliculata 5S ribosomal RNA (LOC112573008)
								ref|XM_025253673.1|	PREDICTED: Pomacea canaliculata ADP
								ref|XM_025253426.1|	PREDICTED: Pomacea canaliculata cAMP-dependent protein kinase catalytic subunit beta (LOC112573234)
								ref|XM_025238132.1|	PREDICTED: Pomacea canaliculata cyclic AMP-responsive element-binding protein 1-like (LOC112563796)
								ref|XR_003097307.1|	PREDICTED: Pomacea canaliculata U2 spliceosomal RNA (LOC112554742)
								ref|XR_003097308.1|	PREDICTED: Pomacea canaliculata U2 spliceosomal RNA (LOC112554743)
								ref|XR_003099045.1|	PREDICTED: Pomacea canaliculata U2 spliceosomal RNA (LOC112563412)
								ref|XR_003099419.1|	PREDICTED: Pomacea canaliculata U2 spliceosomal RNA (LOC112565470)
								ref|XR_003098148.1|	PREDICTED: Pomacea canaliculata U4 spliceosomal RNA (LOC112558412)
								ref|XR_003101132.1|	PREDICTED: Pomacea canaliculata U6 spliceosomal RNA (LOC112573023)
								ref|XR_003098200.1|	PREDICTED: Pomacea canaliculata uncharacterized LOC112558638 (LOC112558638)
								ref|XM_025246671.1|	PREDICTED: Pomacea canaliculata uncharacterized LOC112569024 (LOC112569024)
								ref|XM_030976122.1|	PREDICTED: Strongylocentrotus purpuratus 5-hydroxytryptamine receptor 1A-alpha-like (LOC755175)
								ref|XR_004066027.1|	PREDICTED: Strongylocentrotus purpuratus 5S ribosomal RNA (LOC115928330)
								ref|XM_030990183.1|	PREDICTED: Strongylocentrotus purpuratus ATP synthase subunit beta
								ref|XM_030999794.1|	PREDICTED: Strongylocentrotus purpuratus catechol O-methyltransferase (LOC100891805)
								ref|XM_030981747.1|	PREDICTED: Strongylocentrotus purpuratus E3 ubiquitin-protein ligase TRIP12-like (LOC105443981)
								ref|XM_030986089.1|	PREDICTED: Strongylocentrotus purpuratus F-box protein SKP2B-like (LOC100893208)
								ref|XM_030975829.1|	PREDICTED: Strongylocentrotus purpuratus histone H3
								ref|XM_003724413.3|	PREDICTED: Strongylocentrotus purpuratus histone H3
								ref|XM_011679854.2|	PREDICTED: Strongylocentrotus purpuratus histone H3
								ref|XM_777897.3|	PREDICTED: Strongylocentrotus purpuratus histone H3
								ref|XM_001177624.3|	PREDICTED: Strongylocentrotus purpuratus histone H4 (LOC753782)
								ref|XM_011681224.2|	PREDICTED: Strongylocentrotus purpuratus histone H4 (LOC754292)
								ref|XM_011668914.2|	PREDICTED: Strongylocentrotus purpuratus INO80 complex subunit D (LOC582717)
								ref|XM_030985650.1|	PREDICTED: Strongylocentrotus purpuratus Kv channel-interacting protein 4 (LOC100888051)
								ref|XR_004063452.1|	PREDICTED: Strongylocentrotus purpuratus large subunit ribosomal RNA (LOC115922396)
								ref|XM_030996526.1|	PREDICTED: Strongylocentrotus purpuratus P2X purinoceptor 7-like (LOC115928710)
								ref|XM_030985974.1|	PREDICTED: Strongylocentrotus purpuratus protein ALP1-like (LOC115924146)
								ref|XM_003724820.3|	PREDICTED: Strongylocentrotus purpuratus putative nuclease HARBI1 (LOC100893054)
								ref|XM_011683835.2|	PREDICTED: Strongylocentrotus purpuratus putative nuclease HARBI1 (LOC105446697)
								ref|XM_030989926.1|	PREDICTED: Strongylocentrotus purpuratus putative nuclease HARBI1 (LOC115925883)
								ref|XM_030995711.1|	PREDICTED: Strongylocentrotus purpuratus putative nuclease HARBI1 (LOC115928478)
								ref|XM_030995639.1|	PREDICTED: Strongylocentrotus purpuratus single-stranded DNA-binding protein 3 (LOC593225)
								ref|XR_004063290.1|	PREDICTED: Strongylocentrotus purpuratus small subunit ribosomal RNA (LOC115922030)
								ref|XR_004063273.1|	PREDICTED: Strongylocentrotus purpuratus U1 spliceosomal RNA (LOC115917775)
								ref|XR_004064455.1|	PREDICTED: Strongylocentrotus purpuratus U1 spliceosomal RNA (LOC115917780)
								ref|XR_004062978.1|	PREDICTED: Strongylocentrotus purpuratus U2 spliceosomal RNA (LOC115917765)
								ref|XR_004064454.1|	PREDICTED: Strongylocentrotus purpuratus U4 spliceosomal RNA (LOC115924851)
								ref|XM_030998215.1|	PREDICTED: Strongylocentrotus purpuratus uncharacterized LOC100890715 (LOC100890715)
								ref|XM_030998223.1|	PREDICTED: Strongylocentrotus purpuratus uncharacterized LOC100890715 (LOC100890715)
								ref|XM_030998243.1|	PREDICTED: Strongylocentrotus purpuratus uncharacterized LOC100890715 (LOC100890715)
								ref|XM_030977503.1|	PREDICTED: Strongylocentrotus purpuratus uncharacterized LOC100894027 (LOC100894027)
								ref|XM_030986755.1|	PREDICTED: Strongylocentrotus purpuratus uncharacterized LOC105437795 (LOC105437795)
								ref|XM_011673097.2|	PREDICTED: Strongylocentrotus purpuratus uncharacterized LOC105441710 (LOC105441710)
								ref|XM_011675815.2|	PREDICTED: Strongylocentrotus purpuratus uncharacterized LOC105443026 (LOC105443026)
								ref|XM_030983166.1|	PREDICTED: Strongylocentrotus purpuratus uncharacterized LOC105446121 (LOC105446121)
								ref|XM_030979049.1|	PREDICTED: Strongylocentrotus purpuratus uncharacterized LOC115921548 (LOC115921548)
								ref|XM_030983292.1|	PREDICTED: Strongylocentrotus purpuratus uncharacterized LOC115923092 (LOC115923092)
								ref|XM_030984567.1|	PREDICTED: Strongylocentrotus purpuratus uncharacterized LOC115923584 (LOC115923584)
								ref|XM_030985666.1|	PREDICTED: Strongylocentrotus purpuratus uncharacterized LOC115924054 (LOC115924054)
								ref|XM_030990292.1|	PREDICTED: Strongylocentrotus purpuratus uncharacterized LOC115926030 (LOC115926030)
								ref|XM_030991647.1|	PREDICTED: Strongylocentrotus purpuratus uncharacterized LOC115926660 (LOC115926660)
								ref|XM_030993771.1|	PREDICTED: Strongylocentrotus purpuratus uncharacterized LOC115927646 (LOC115927646)
								ref|XM_030996323.1|	PREDICTED: Strongylocentrotus purpuratus uncharacterized LOC115928661 (LOC115928661)
								ref|XM_030996973.1|	PREDICTED: Strongylocentrotus purpuratus uncharacterized LOC115928905 (LOC115928905)
								ref|XM_030997907.1|	PREDICTED: Strongylocentrotus purpuratus uncharacterized LOC115929252 (LOC115929252)
								ref|XR_004066559.1|	PREDICTED: Strongylocentrotus purpuratus uncharacterized LOC115929575 (LOC115929575)
								ref|XM_795144.5|	PREDICTED: Strongylocentrotus purpuratus uncharacterized LOC583662 (LOC583662)
								ref|XM_030996491.1|	PREDICTED: Strongylocentrotus purpuratus uncharacterized LOC753793 (LOC753793)
								gb|KT209056.1|	Processa modica voucher MT06721 cytochrome oxidase subunit 1 (COI) gene
								gb|KJ483069.1|	Sagartia ornata isolate s462 28S large subunit ribosomal RNA gene and external transcribed spacer
								gb|KP899756.1|	Sagitta setosa isolate SS-S1-28 mitochondrion
								gb|KP899753.1|	Sagitta setosa isolate SS-S1-36 mitochondrion
								gb|KP899760.1|	Sagitta setosa isolate SS-S1-49 mitochondrion
								gb|KX709932.1|	Sagitta setosa isolate Sset-2 28S ribosomal RNA gene
								gb|MG878899.1|	Spiophanes bombyx isolate 18675 16S ribosomal RNA gene
								gb|MG874413.1|	Spiophanes cf. bombyx VVP-2020 isolate 19618 histone H3 (H3) gene
								gb|MG878898.1|	Spiophanes cf. bombyx VVP-2020 isolate 2365 16S ribosomal RNA gene
								gb|KM998751.1|	Spiophanes cf. bombyx VVP-2020 isolate 2365 cytochrome c oxidase subunit 1 (COI) gene
								gb|MG878927.1|	Spiophanes cf. bombyx VVP-2020 isolate 2365 large subunit ribosomal RNA gene
								gb|MN193544.1|	Spiophanes cf. convexus VVP-2020 isolate 18567.1 large subunit ribosomal RNA gene
								gb|MG913228.1|	Spiophanes cf. convexus VVP-2020 isolate 20103.1 small subunit ribosomal RNA gene
								gb|MG913230.1|	Spiophanes cf. convexus VVP-2020 isolate 20103.3 small subunit ribosomal RNA gene
								gb|L11266.1|	Spisula solida 18S ribosomal RNA (18S rRNA) gene
								emb|AM779726.1|	Spisula solida partial 28S rRNA gene
								gb|KX713347.1|	Spisula solida voucher BivAToL-319 18S ribosomal RNA gene
								gb|KX713434.1|	Spisula solida voucher BivAToL-319 28S ribosomal RNA gene
								gb|KX713581.1|	Spisula solida voucher BivAToL-319 histone H3 gene
								gb|MG934910.1|	Spisula solida voucher MollOvr 8840V cytochrome oxidase subunit 1 (COI) gene
								gb|AY839575.1|	Sthenelais boa 18S ribosomal RNA gene
								gb|DQ779672.1|	Sthenelais boa 18S ribosomal RNA gene
								gb|DQ779711.1|	Sthenelais boa 28S ribosomal RNA gene
								gb|KJ182981.1|	Sthenelais boa voucher ech22 18S small subunit ribosomal RNA gene
								gb|EU375497.1|	Temora longicornis 28S ribosomal RNA gene
								gb|JX995147.1|	Temora longicornis isolate MT00499 cytochrome c oxidase subunit I (COI) gene
								tpe|LN901195.1|	TPA_asm: Ectopleura larynx mitochondrial genome
								gb|KY489326.1|	Tritia ephamilla voucher MNHN:IM 2009-24014 histone 3 (H3) gene
								ref|NC_013248.1|	Tritia reticulatus mitochondrion
								gb|HM459899.1|	Tubificoides diazi isolate CE3409 12S ribosomal RNA gene
								gb|HM460289.1|	Tubificoides diazi isolate CE3409 18S ribosomal RNA gene
								gb|HM459944.1|	Tubificoides diazi isolate CE3410 16S ribosomal RNA gene
								gb|HM460291.1|	Tubificoides diazi isolate CE3411 18S ribosomal RNA gene
								gb|HM460137.1|	Tubificoides diazi isolate CE3411 cytochrome oxidase subunit I (COI) gene
								gb|JX051548.1|	Venerupis corrugata haplotype VpCo02 cytochrome oxidase subunit I (COI) gene
								gb|KX018604.1|	Venerupis corrugata retrotransposon steamer-like element polyprotein (pol) gene
								gb|JF901814.1|	Venerupis senegalensis voucher Tpul G1 16S ribosomal RNA gene
