# Supplementary material for: Advancing molecular macrobenthos biodiversity monitoring: a comparison between Oxford Nanopore and Illumina based metabarcoding and metagenomics
Source: PeerJ. 2025 Apr 14;13:e19158. doi: 10.7717/peerj.19158 (PMC12005195; doi:10.7717/peerj.19158)
Supplement: Supplemental Information 4 — Yellow is non-significant observations. [file peerj-13-19158-s004.xlsx]

## Sheet: Table_S4_2-way_ANOVA
This is for NovaSeq alignment length >= 100 and max counts >=5
	Species richness									Shannon Diversity
	Two way analysis of Variance									Two way analysis of Variance						Q-Q plot
	Df	Sum Sq	Mean Sq	F value	Pr(>F)					Df	Sum Sq	Mean Sq	F value	Pr(>F)
Location	3	2147.19	715.731	104.741	6.34787e-14				Location	3	19.8011	6.60037	104.49	6.51924e-14
Method	2	21.5	10.75	1.57317	0.228034				Method	2	0.923846	0.461923	7.3127	0.00331175
Location*Method	6	178.056	29.6759	4.34282	0.00418803				Location*Method	6	2.90615	0.484358	7.66788	0.000112189
Residuals	24	164	6.83333	NA	NA				Residuals	24	1.51601	0.0631672	NA	NA
		Tukey HSD									Tukey HSD
		diff	lwr	upr	p adj						diff	lwr	upr	p adj
Location	330-120	-14.6667	-18.0661	-11.2673	8.68678e-11				Location	330-120	-0.918262	-1.2451	-0.591426	3.17382e-07
	840-120	-15.2222	-18.6216	-11.8228	4.01772e-11					840-120	-0.96442	-1.29126	-0.637584	1.34011e-07
	ZVL-120	-20.8889	-24.2883	-17.4895	6.67244e-14					ZVL-120	-2.09194	-2.41878	-1.76511	3.9746e-14
	840-330	-0.555556	-3.95494	2.84383	0.968825					840-330	-0.0461582	-0.372994	0.280677	0.979451
	ZVL-330	-6.22222	-9.62161	-2.82284	0.000202583					ZVL-330	-1.17368	-1.50052	-0.846844	3.44085e-09
	ZVL-840	-5.66667	-9.06605	-2.26728	0.000626013					ZVL-840	-1.12752	-1.45436	-0.800686	7.45838e-09
Method	Nanopore-Miseq	1.5	-1.16507	4.16507	0.353969				Method	Nanopore-Miseq	0.120096	-0.136139	0.376331	0.481696
	Novaseq-Miseq	1.75	-0.915073	4.41507	0.248856					Novaseq-Miseq	0.383565	0.12733	0.6398	0.00282103
	Novaseq-Nanopore	0.25	-2.41507	2.91507	0.970238					Novaseq-Nanopore	0.263469	0.00723396	0.519704	0.0430493
Location*Method	330:Miseq-120:Miseq	-13	-20.6958	-5.30424	0.000142241				Location*Method	330:Miseq-120:Miseq	-0.834022	-1.57394	-0.094108	0.0179846
	840:Miseq-120:Miseq	-12.6667	-20.3624	-4.9709	0.000206591					840:Miseq-120:Miseq	-0.861942	-1.60186	-0.122028	0.0131369
	ZVL:Miseq-120:Miseq	-21	-28.6958	-13.3042	3.93754e-08					ZVL:Miseq-120:Miseq	-2.52364	-3.26355	-1.78372	4.49755e-10
	120:Nanopore-120:Miseq	7	-0.695764	14.6958	0.0986198					120:Nanopore-120:Miseq	0.329288	-0.410626	1.0692	0.891121
	330:Nanopore-120:Miseq	-12	-19.6958	-4.30424	0.00043753					330:Nanopore-120:Miseq	-0.775243	-1.51516	-0.0353291	0.0343229
	840:Nanopore-120:Miseq	-15.3333	-23.0291	-7.63757	1.10463e-05					840:Nanopore-120:Miseq	-0.968909	-1.70882	-0.228996	0.00383375
	ZVL:Nanopore-120:Miseq	-20.3333	-28.0291	-12.6376	7.3069e-08					ZVL:Nanopore-120:Miseq	-2.32435	-3.06427	-1.58444	2.42923e-09
	120:NovaSeq-120:Miseq	-0.666667	-8.36243	7.0291	1					120:Novaseq-120:Miseq	-0.0093604	-0.749274	0.730553	1
	330:NovaSeq-120:Miseq	-12.6667	-20.3624	-4.9709	0.000206591					330:Novaseq-120:Miseq	-0.825593	-1.56551	-0.0856791	0.0197574
	840:NovaSeq-120:Miseq	-11.3333	-19.0291	-3.63757	0.000929611					840:Novaseq-120:Miseq	-0.742481	-1.48239	-0.00256705	0.0486693
	ZVL:NovaSeq-120:Miseq	-15	-22.6958	-7.30424	1.57989e-05					ZVL:Novaseq-120:Miseq	-1.10791	-1.84782	-0.367993	0.00074991
	840:Miseq-330:Miseq	0.333333	-7.36243	8.0291	1					840:Miseq-330:Miseq	-0.0279202	-0.767834	0.711994	1
	ZVL:Miseq-330:Miseq	-8	-15.6958	-0.304236	0.0366447					ZVL:Miseq-330:Miseq	-1.68962	-2.42953	-0.949703	1.07308e-06
	120:Nanopore-330:Miseq	20	12.3042	27.6958	9.99816e-08					120:Nanopore-330:Miseq	1.16331	0.423396	1.90322	0.000391086
	330:Nanopore-330:Miseq	1	-6.69576	8.69576	0.999997					330:Nanopore-330:Miseq	0.0587789	-0.681135	0.798693	1
	840:Nanopore-330:Miseq	-2.33333	-10.0291	5.36243	0.992122					840:Nanopore-330:Miseq	-0.134888	-0.874802	0.605026	0.999918
	ZVL:Nanopore-330:Miseq	-7.33333	-15.0291	0.362431	0.0716561					ZVL:Nanopore-330:Miseq	-1.49033	-2.23024	-0.750417	9.2384e-06
	120:NovaSeq-330:Miseq	12.3333	4.63757	20.0291	0.000300478					120:Novaseq-330:Miseq	0.824661	0.0847476	1.56458	0.0199633
	330:NovaSeq-330:Miseq	0.333333	-7.36243	8.0291	1					330:Novaseq-330:Miseq	0.00842886	-0.731485	0.748343	1
	840:NovaSeq-330:Miseq	1.66667	-6.0291	9.36243	0.999575					840:Novaseq-330:Miseq	0.0915409	-0.648373	0.831455	0.999998
	ZVL:NovaSeq-330:Miseq	-2	-9.69576	5.69576	0.997812					ZVL:Novaseq-330:Miseq	-0.273885	-1.0138	0.466029	0.965413
	ZVL:Miseq-840:Miseq	-8.33333	-16.0291	-0.637569	0.0258694					ZVL:Miseq-840:Miseq	-1.6617	-2.40161	-0.921782	1.44093e-06
	120:Nanopore-840:Miseq	19.6667	11.9709	27.3624	1.37216e-07					120:Nanopore-840:Miseq	1.19123	0.451316	1.93114	0.000281961
	330:Nanopore-840:Miseq	0.666667	-7.0291	8.36243	1					330:Nanopore-840:Miseq	0.0866991	-0.653215	0.826613	0.999999
	840:Nanopore-840:Miseq	-2.66667	-10.3624	5.0291	0.978261					840:Nanopore-840:Miseq	-0.106967	-0.846881	0.632946	0.999992
	ZVL:Nanopore-840:Miseq	-7.66667	-15.3624	0.0290973	0.0514881					ZVL:Nanopore-840:Miseq	-1.46241	-2.20232	-0.722496	1.26012e-05
	120:NovaSeq-840:Miseq	12	4.30424	19.6958	0.00043753					120:Novaseq-840:Miseq	0.852582	0.112668	1.5925	0.014602
	330:NovaSeq-840:Miseq	3.55271e-15	-7.69576	7.69576	1					330:Novaseq-840:Miseq	0.0363491	-0.703565	0.776263	1
	840:NovaSeq-840:Miseq	1.33333	-6.36243	9.0291	0.99995					840:Novaseq-840:Miseq	0.119461	-0.620453	0.859375	0.999975
	ZVL:NovaSeq-840:Miseq	-2.33333	-10.0291	5.36243	0.992122					ZVL:Novaseq-840:Miseq	-0.245965	-0.985878	0.493949	0.983976
	120:Nanopore-ZVL:Miseq	28	20.3042	35.6958	1.15667e-10					120:Nanopore-ZVL:Miseq	2.85293	2.11301	3.59284	3.33661e-11
	330:Nanopore-ZVL:Miseq	9	1.30424	16.6958	0.0126451					330:Nanopore-ZVL:Miseq	1.7484	1.00848	2.48831	5.81288e-07
	840:Nanopore-ZVL:Miseq	5.66667	-2.0291	13.3624	0.304988					840:Nanopore-ZVL:Miseq	1.55473	0.814815	2.29464	4.55129e-06
	ZVL:Nanopore-ZVL:Miseq	0.666667	-7.0291	8.36243	1					ZVL:Nanopore-ZVL:Miseq	0.199286	-0.540628	0.9392	0.997028
	120:NovaSeq-ZVL:Miseq	20.3333	12.6376	28.0291	7.3069e-08					120:Novaseq-ZVL:Miseq	2.51428	1.77436	3.25419	4.85841e-10
	330:NovaSeq-ZVL:Miseq	8.33333	0.637569	16.0291	0.0258694					330:Novaseq-ZVL:Miseq	1.69805	0.958132	2.43796	9.82162e-07
	840:NovaSeq-ZVL:Miseq	9.66667	1.9709	17.3624	0.00606628					840:Novaseq-ZVL:Miseq	1.78116	1.04124	2.52107	4.14871e-07
	ZVL:NovaSeq-ZVL:Miseq	6	-1.69576	13.6958	0.236138					ZVL:Novaseq-ZVL:Miseq	1.41573	0.675818	2.15565	2.12694e-05
	330:Nanopore-120:Nanopore	-19	-26.6958	-11.3042	2.60785e-07					330:Nanopore-120:Nanopore	-1.10453	-1.84444	-0.364617	0.000780296
	840:Nanopore-120:Nanopore	-22.3333	-30.0291	-14.6376	1.18442e-08					840:Nanopore-120:Nanopore	-1.2982	-2.03811	-0.558283	8.13063e-05
	ZVL:Nanopore-120:Nanopore	-27.3333	-35.0291	-19.6376	1.92632e-10					ZVL:Nanopore-120:Nanopore	-2.65364	-3.39355	-1.91373	1.56899e-10
	120:NovaSeq-120:Nanopore	-7.66667	-15.3624	0.0290973	0.0514881					120:Novaseq-120:Nanopore	-0.338648	-1.07856	0.401266	0.873029
	330:NovaSeq-120:Nanopore	-19.6667	-27.3624	-11.9709	1.37216e-07					330:Novaseq-120:Nanopore	-1.15488	-1.89479	-0.414967	0.000431747
	840:NovaSeq-120:Nanopore	-18.3333	-26.0291	-10.6376	5.01654e-07					840:Novaseq-120:Nanopore	-1.07177	-1.81168	-0.331855	0.00114732
	ZVL:NovaSeq-120:Nanopore	-22	-29.6958	-14.3042	1.59235e-08					ZVL:Novaseq-120:Nanopore	-1.43719	-2.17711	-0.69728	1.6708e-05
	840:Nanopore-330:Nanopore	-3.33333	-11.0291	4.36243	0.906662					840:Nanopore-330:Nanopore	-0.193667	-0.93358	0.546247	0.997674
	ZVL:Nanopore-330:Nanopore	-8.33333	-16.0291	-0.637569	0.0258694					ZVL:Nanopore-330:Nanopore	-1.54911	-2.28902	-0.809195	4.83912e-06
	120:NovaSeq-330:Nanopore	11.3333	3.63757	19.0291	0.000929611					120:Novaseq-330:Nanopore	0.765883	0.0259687	1.5058	0.0379585
	330:NovaSeq-330:Nanopore	-0.666667	-8.36243	7.0291	1					330:Novaseq-330:Nanopore	-0.05035	-0.790264	0.689564	1
	840:NovaSeq-330:Nanopore	0.666667	-7.0291	8.36243	1					840:Novaseq-330:Nanopore	0.032762	-0.707152	0.772676	1
	ZVL:NovaSeq-330:Nanopore	-3	-10.6958	4.69576	0.951154					ZVL:Novaseq-330:Nanopore	-0.332664	-1.07258	0.40725	0.88478
	ZVL:Nanopore-840:Nanopore	-5	-12.6958	2.69576	0.476149					ZVL:Nanopore-840:Nanopore	-1.35544	-2.09536	-0.615529	4.21514e-05
	120:NovaSeq-840:Nanopore	14.6667	6.9709	22.3624	2.26553e-05					120:Novaseq-840:Nanopore	0.959549	0.219635	1.69946	0.00427554
	330:NovaSeq-840:Nanopore	2.66667	-5.0291	10.3624	0.978261					330:Novaseq-840:Nanopore	0.143317	-0.596597	0.88323	0.999852
	840:NovaSeq-840:Nanopore	4	-3.69576	11.6958	0.763067					840:Novaseq-840:Nanopore	0.226429	-0.513485	0.966342	0.991521
	ZVL:NovaSeq-840:Nanopore	0.333333	-7.36243	8.0291	1					ZVL:Novaseq-840:Nanopore	-0.138997	-0.878911	0.600917	0.99989
	120:NovaSeq-ZVL:Nanopore	19.6667	11.9709	27.3624	1.37216e-07					120:Novaseq-ZVL:Nanopore	2.31499	1.57508	3.05491	2.63582e-09
	330:NovaSeq-ZVL:Nanopore	7.66667	-0.0290973	15.3624	0.0514881					330:Novaseq-ZVL:Nanopore	1.49876	0.758845	2.23867	8.4154e-06
	840:NovaSeq-ZVL:Nanopore	9	1.30424	16.6958	0.0126451					840:Novaseq-ZVL:Nanopore	1.58187	0.841957	2.32179	3.38879e-06
	ZVL:Novaseq-ZVL:Nanopore	5.33333	-2.36243	13.0291	0.385602					ZVL:Novaseq-ZVL:Nanopore	1.21645	0.476532	1.95636	0.000209991
	330:NovaSeq-120:NovaSeq	-12	-19.6958	-4.30424	0.00043753					330:Novaseq-120:Novaseq	-0.816233	-1.55615	-0.0763187	0.0219211
	840:NovaSeq-120:NovaSeq	-10.6667	-18.3624	-2.9709	0.00197538					840:Novaseq-120:Novaseq	-0.73312	-1.47303	0.00679334	0.0536839
	ZVL:NovaSeq-120:NovaSeq	-14.3333	-22.0291	-6.63757	3.25691e-05					ZVL:Novaseq-120:Novaseq	-1.09855	-1.83846	-0.358632	0.000837217
	840:NovaSeq-330:NovaSeq	1.33333	-6.36243	9.0291	0.99995					840:Novaseq-330:Novaseq	0.0831121	-0.656802	0.823026	0.999999
	ZVL:NovaSeq-330:NovaSeq	-2.33333	-10.0291	5.36243	0.992122					ZVL:Novaseq-330:Novaseq	-0.282314	-1.02223	0.4576	0.957578
	ZVL:NovaSeq-840:NovaSeq	-3.66667	-11.3624	4.0291	0.843314					ZVL:Novaseq-840:Novaseq	-0.365426	-1.10534	0.374488	0.812844
