# Supplementary material for: Advancing molecular macrobenthos biodiversity monitoring: a comparison between Oxford Nanopore and Illumina based metabarcoding and metagenomics
Source: PeerJ. 2025 Apr 14;13:e19158. doi: 10.7717/peerj.19158 (PMC12005195; doi:10.7717/peerj.19158)
Supplement: Supplemental Information 5 [file peerj-13-19158-s005.xlsx]

## Sheet: Table_S5_PERMANOVA
PERMANOVA Analysis
	Df	SumOfSqs	R2	F	Pr(>F)
Location	3	7.33989	0.514929	16.0452	0.001
variable	2	0.989843	0.0694423	3.24574	0.001
Location:variable	6	2.26484	0.15889	2.47551	0.001
Residual	24	3.6596	0.256739	NA	NA
Total	35	14.2542	1	NA	NA
Post hoc pairwise Adonis
	pairs	Df	SumsOfSqs	F.Model	R2	p.value	p.adjusted
Location	120 vs 330	1	2.85806	14.4065	0.473797	0.002	0.012
	120 vs 840	1	2.31942	8.54046	0.348016	0.001	0.006
	120 vs ZVL	1	2.95711	15.5918	0.493539	0.001	0.006
	330 vs 840	1	0.782966	3.22931	0.167937	0.005	0.03
	330 vs ZVL	1	3.1693	19.7421	0.552349	0.001	0.006
	840 vs ZVL	1	2.59361	11.0967	0.409522	0.001	0.006
Method	Miseq vs Nanopore	1	0.157179	0.394519	0.0176168	0.9	1
	Miseq vs NovaSeq	1	0.621044	1.53394	0.06518	0.142	0.426
	Nanopore vs NovaSeq	1	0.706372	1.75464	0.0738651	0.079	0.237
