# Supplementary material for: Advancing molecular macrobenthos biodiversity monitoring: a comparison between Oxford Nanopore and Illumina based metabarcoding and metagenomics
Source: PeerJ. 2025 Apr 14;13:e19158. doi: 10.7717/peerj.19158 (PMC12005195; doi:10.7717/peerj.19158)
Supplement: Supplemental Information 6 [file peerj-13-19158-s006.xlsx]

## Sheet: Table_S6_phylum_Species_list
Only replicates that were identified morphologically were used to determine presence/absence of genera and species (replicates 120B, 330C, 840C, ZVLA)								Table of all species and their total abundance for the Miseq, Nanopore and Novaseq methods.
	Morphology	Miseq	Nanopore	NovaSeq	NovaSeq (COI)	Phylum		Species	Miseq	Nanopore	NovaSeq	Abundance (read count)	Phylum	In GEANS
Abludomelita obtusata	TRUE	FALSE	FALSE	FALSE	FALSE	Arthropoda	1	Abra alba	TRUE	TRUE	TRUE	181, 78, 8884	Mollusca	TRUE
Abra alba	TRUE	TRUE	TRUE	TRUE	TRUE	Mollusca	2	Acraspedanthus ferax	FALSE	FALSE	TRUE	0, 0, 7	Cnidaria	FALSE
Acraspedanthus ferax	FALSE	FALSE	FALSE	TRUE	FALSE	Cnidaria	3	Acrocnida brachiata	TRUE	FALSE	TRUE	719, 0, 117	Echinodermata	TRUE
Acrocnida brachiata	TRUE	TRUE	FALSE	TRUE	TRUE	Echinodermata	4	Actinia tenebrosa	FALSE	FALSE	TRUE	0, 0, 10342	Cnidaria	FALSE
Actinia tenebrosa	FALSE	FALSE	FALSE	TRUE	FALSE	Cnidaria	5	Anapagurus laevis	TRUE	TRUE	TRUE	1333, 11169, 205	Arthropoda	TRUE
Aonides oxycephala	TRUE	FALSE	FALSE	FALSE	FALSE	Annelida	6	Aonides paucibranchiata	TRUE	TRUE	FALSE	23, 70, 0	Annelida	TRUE
Aonides paucibranchiata	TRUE	FALSE	FALSE	FALSE	FALSE	Annelida	7	Asbjornsenia pygmaea	TRUE	FALSE	FALSE	8, 0, 0	Mollusca	TRUE
Apolochus neapolitanus	TRUE	FALSE	FALSE	FALSE	FALSE	Arthropoda	8	Bathyporeia elegans	TRUE	TRUE	FALSE	10279, 1510, 0	Arthropoda	TRUE
Bathyporeia elegans	TRUE	TRUE	TRUE	FALSE	FALSE	Arthropoda	9	Bathyporeia guilliamsoniana	TRUE	TRUE	FALSE	7157, 2367, 0	Arthropoda	TRUE
Bathyporeia guilliamsoniana	TRUE	TRUE	TRUE	FALSE	FALSE	Arthropoda	10	Bathyporeia sp.	FALSE	FALSE	TRUE	0, 0, 7650	Arthropoda	FALSE
Bathyporeia sp.	FALSE	FALSE	FALSE	TRUE	TRUE	Arthropoda	11	Cirriformia sp.	FALSE	FALSE	TRUE	0, 0, 481	Annelida	FALSE
Capitella minima	TRUE	FALSE	FALSE	FALSE	FALSE	Annelida	12	Cirriformia tentaculata	FALSE	FALSE	TRUE	0, 0, 117	Annelida	FALSE
Caulleriella alata	TRUE	FALSE	FALSE	FALSE	FALSE	Annelida	13	Crepidula fornicata	TRUE	TRUE	TRUE	523, 127, 4104	Mollusca	TRUE
Crepidula fornicata	TRUE	TRUE	TRUE	TRUE	TRUE	Mollusca	14	Cylista troglodytes	TRUE	TRUE	FALSE	47865, 75594, 0	Cnidaria	TRUE
Cylista troglodytes	FALSE	TRUE	TRUE	FALSE	FALSE	Cnidaria	15	Diadumene lineata	FALSE	FALSE	TRUE	0, 0, 4242	Cnidaria	TRUE
Diogenes pugilator	TRUE	TRUE	TRUE	TRUE	TRUE	Arthropoda	16	Diogenes pugilator	TRUE	TRUE	TRUE	29, 16, 14217	Arthropoda	TRUE
Echinocardium cordatum	TRUE	TRUE	TRUE	TRUE	TRUE	Echinodermata	17	Echinocardium cordatum	TRUE	TRUE	TRUE	16959, 21977, 21880	Echinodermata	TRUE
Echinocyamus pusillus	FALSE	TRUE	FALSE	TRUE	TRUE	Echinodermata	18	Echinocyamus pusillus	TRUE	FALSE	TRUE	17, 0, 8	Echinodermata	TRUE
Electra pilosa	FALSE	FALSE	TRUE	FALSE	FALSE	Bryozoa	19	Ectopleura dumortierii	FALSE	FALSE	TRUE	0, 0, 158	Cnidaria	FALSE
Ensis leei	TRUE	FALSE	TRUE	TRUE	TRUE	Mollusca	20	Ectopleura larynx	FALSE	FALSE	TRUE	0, 0, 54	Cnidaria	TRUE
Eteone longa	TRUE	FALSE	FALSE	FALSE	FALSE	Annelida	21	Electra pilosa	TRUE	TRUE	TRUE	2, 12, 2	Bryozoa	TRUE
Eucheilota maculata	FALSE	FALSE	TRUE	FALSE	TRUE	Cnidaria	22	Ensis leei	TRUE	TRUE	TRUE	3, 548, 41939	Mollusca	TRUE
Eumida mackiei	FALSE	TRUE	TRUE	FALSE	TRUE	Annelida	23	Eucheilota maculata	TRUE	TRUE	FALSE	5, 116, 0	Cnidaria	TRUE
Eumida sanguinea	TRUE	FALSE	FALSE	FALSE	FALSE	Annelida	24	Eumida mackiei	TRUE	TRUE	FALSE	9, 153, 0	Annelida	TRUE
Eunereis longissima	FALSE	FALSE	TRUE	FALSE	FALSE	Annelida	25	Eunereis longissima	FALSE	TRUE	FALSE	0, 1, 0	Annelida	TRUE
Fabulina fabula	TRUE	FALSE	TRUE	FALSE	FALSE	Mollusca	26	Eutima gegenbauri	FALSE	FALSE	TRUE	0, 0, 4	Cnidaria	FALSE
Gastrosaccus spinifer	TRUE	TRUE	TRUE	FALSE	TRUE	Arthropoda	27	Exaiptasia pallida	FALSE	FALSE	TRUE	0, 0, 60	Cnidaria	FALSE
Glycera alba	FALSE	FALSE	FALSE	TRUE	TRUE	Annelida	28	Fabulina fabula	FALSE	TRUE	FALSE	0, 14, 0	Mollusca	TRUE
Glycera lapidum	TRUE	FALSE	FALSE	TRUE	FALSE	Annelida	29	Gastrosaccus spinifer	TRUE	TRUE	FALSE	8075, 4512, 0	Arthropoda	TRUE
Glycera tridactyla	TRUE	FALSE	FALSE	TRUE	FALSE	Annelida	30	Glycera alba	FALSE	FALSE	TRUE	0, 0, 4	Annelida	FALSE
Haloclava producta	FALSE	FALSE	FALSE	TRUE	FALSE	Cnidaria	31	Glycera lapidum	FALSE	FALSE	TRUE	0, 0, 779	Annelida	FALSE
Harmothoe glabra	TRUE	FALSE	FALSE	FALSE	TRUE	Annelida	32	Glycera sp.	FALSE	FALSE	TRUE	0, 0, 3	Annelida	FALSE
Hesionura elongata	TRUE	TRUE	FALSE	FALSE	TRUE	Annelida	33	Glycera tridactyla	FALSE	FALSE	TRUE	0, 0, 350	Annelida	FALSE
Hormathia digitata	FALSE	FALSE	FALSE	TRUE	TRUE	Cnidaria	34	Haloclava producta	FALSE	FALSE	TRUE	0, 0, 1903	Cnidaria	FALSE
Jesogammarus spinopalpus	FALSE	FALSE	FALSE	TRUE	FALSE	Arthropoda	35	Hesionura elongata	TRUE	FALSE	FALSE	78, 0, 0	Annelida	TRUE
Kurtiella bidentata	TRUE	FALSE	FALSE	FALSE	FALSE	Mollusca	36	Hormathia digitata	FALSE	FALSE	TRUE	0, 0, 69855	Cnidaria	TRUE
Lagis koreni	TRUE	TRUE	TRUE	FALSE	FALSE	Annelida	37	Hubrechtella juliae	FALSE	FALSE	TRUE	0, 0, 6	Nemertea	FALSE
Liocarcinus holsatus	TRUE	TRUE	TRUE	FALSE	FALSE	Arthropoda	38	Jesogammarus spinopalpus	FALSE	FALSE	TRUE	0, 0, 433	Arthropoda	FALSE
Liocarcinus marmoreus	TRUE	TRUE	FALSE	TRUE	TRUE	Arthropoda	39	Lagis koreni	TRUE	TRUE	FALSE	19, 88, 0	Annelida	TRUE
Loimia ramzega	FALSE	FALSE	TRUE	FALSE	TRUE	Annelida	40	Lanice conchilega	TRUE	TRUE	FALSE	136, 109, 0	Annelida	TRUE
Macoma balthica	TRUE	TRUE	TRUE	TRUE	TRUE	Mollusca	41	Liocarcinus holsatus	TRUE	TRUE	FALSE	1642, 98, 0	Arthropoda	TRUE
Magelona johnstoni	TRUE	TRUE	FALSE	FALSE	TRUE	Annelida	42	Liocarcinus marmoreus	TRUE	TRUE	TRUE	550, 4, 2454	Arthropoda	TRUE
Magelona mirabilis	FALSE	TRUE	TRUE	FALSE	FALSE	Annelida	43	Liponema brevicornis	FALSE	FALSE	TRUE	0, 0, 20	Cnidaria	FALSE
Malmgrenia lunulata	FALSE	FALSE	TRUE	FALSE	FALSE	Annelida	44	Loimia ramzega	FALSE	TRUE	TRUE	0, 89, 1213	Annelida	TRUE
Mediomastus fragilis	TRUE	FALSE	FALSE	FALSE	FALSE	Annelida	45	Lutraria lutraria	TRUE	FALSE	TRUE	1, 0, 1632	Mollusca	TRUE
Membranipora membranacea	FALSE	TRUE	TRUE	FALSE	FALSE	Bryozoa	46	Macoma balthica	TRUE	TRUE	TRUE	84939, 143941, 143331	Mollusca	TRUE
Metridium senile	FALSE	FALSE	FALSE	TRUE	FALSE	Cnidaria	47	Macoma calcarea	FALSE	FALSE	TRUE	0, 0, 10491	Mollusca	FALSE
Microprotopus maculatus	FALSE	FALSE	TRUE	FALSE	FALSE	Arthropoda	48	Magallana gigas	TRUE	FALSE	FALSE	2, 0, 0	Mollusca	TRUE
Moerella iridescens	FALSE	FALSE	FALSE	TRUE	FALSE	Mollusca	49	Magelona johnstoni	TRUE	TRUE	TRUE	113, 1, 3	Annelida	TRUE
Monocorophium acherusicum	TRUE	TRUE	TRUE	FALSE	FALSE	Arthropoda	50	Magelona mirabilis	TRUE	TRUE	TRUE	14, 751, 153	Annelida	TRUE
Mytilus edulis	TRUE	FALSE	FALSE	FALSE	FALSE	Mollusca	51	Malmgrenia lunulata	FALSE	TRUE	FALSE	0, 1, 0	Annelida	TRUE
Mytilus sp.	FALSE	FALSE	FALSE	TRUE	TRUE	Mollusca	52	Malmgrenia sp.	TRUE	FALSE	FALSE	1, 0, 0	Annelida	FALSE
Nephtys assimilis	FALSE	TRUE	TRUE	FALSE	FALSE	Annelida	53	Megaluropus agilis	TRUE	FALSE	FALSE	2, 0, 0	Arthropoda	TRUE
Nephtys cirrosa	TRUE	TRUE	TRUE	TRUE	TRUE	Annelida	54	Membranipora membranacea	TRUE	TRUE	FALSE	21, 73, 0	Bryozoa	TRUE
Nephtys hombergii	TRUE	TRUE	TRUE	TRUE	TRUE	Annelida	55	Metridium senile	FALSE	FALSE	TRUE	0, 0, 17148	Cnidaria	TRUE
Notomastus latericeus	TRUE	FALSE	TRUE	FALSE	FALSE	Annelida	56	Microprotopus maculatus	FALSE	TRUE	FALSE	0, 13, 0	Arthropoda	TRUE
Nototropis swammerdamei	FALSE	TRUE	TRUE	FALSE	FALSE	Arthropoda	57	Moerella iridescens	FALSE	FALSE	TRUE	0, 0, 1443	Mollusca	FALSE
Nototropis swammerdami	TRUE	FALSE	FALSE	FALSE	FALSE	Arthropoda	58	Monocorophium acherusicum	TRUE	TRUE	FALSE	2, 16, 0	Arthropoda	TRUE
Ophiothrix fragilis	FALSE	TRUE	TRUE	FALSE	FALSE	Echinodermata	59	Mytilus sp.	FALSE	FALSE	TRUE	0, 0, 4	Mollusca	FALSE
Ophiura albida	TRUE	TRUE	TRUE	TRUE	TRUE	Echinodermata	60	Nephtys assimilis	TRUE	TRUE	FALSE	2, 19, 0	Annelida	TRUE
Ophiura ophiura	TRUE	TRUE	TRUE	TRUE	TRUE	Echinodermata	61	Nephtys cirrosa	TRUE	TRUE	TRUE	65397, 130743, 44036	Annelida	TRUE
Other	FALSE	FALSE	TRUE	FALSE	FALSE	N/A	62	Nephtys hombergii	TRUE	TRUE	TRUE	562, 2783, 89	Annelida	TRUE
Owenia fusiformis	TRUE	TRUE	TRUE	TRUE	TRUE	Annelida	63	Nephtys sp.	FALSE	FALSE	TRUE	0, 0, 9	Annelida	FALSE
Pagurus bernhardus	TRUE	TRUE	TRUE	TRUE	TRUE	Arthropoda	64	Notomastus latericeus	TRUE	TRUE	FALSE	13, 31, 0	Annelida	TRUE
Pariambus typicus	TRUE	TRUE	TRUE	FALSE	FALSE	Arthropoda	65	Nototropis swammerdamei	TRUE	TRUE	FALSE	2, 66, 133	Arthropoda	TRUE
Petricolaria pholadiformis	TRUE	FALSE	FALSE	FALSE	FALSE	Mollusca	66	Ophelia borealis	TRUE	TRUE	FALSE	360, 18904, 0	Annelida	TRUE
Pholoe baltica	TRUE	TRUE	TRUE	FALSE	TRUE	Annelida	67	Ophiothrix fragilis	TRUE	TRUE	FALSE	135, 268, 0	Echinodermata	TRUE
Phyllodoce mucosa	TRUE	FALSE	FALSE	FALSE	TRUE	Annelida	68	Ophiura albida	TRUE	TRUE	TRUE	847, 1091, 8065	Echinodermata	TRUE
Pinnotheres pisum	FALSE	TRUE	TRUE	TRUE	TRUE	Arthropoda	69	Ophiura ophiura	TRUE	TRUE	TRUE	637, 10476, 2269	Echinodermata	TRUE
Pisidia longicornis	TRUE	TRUE	TRUE	TRUE	TRUE	Arthropoda	70	Other	FALSE	TRUE	FALSE	0, 15497, 0	N/A	FALSE
Pocillopora damicornis	FALSE	FALSE	FALSE	TRUE	FALSE	Cnidaria	71	Owenia fusiformis	TRUE	TRUE	TRUE	1687, 16319, 10000	Annelida	TRUE
Poecilochaetus serpens	FALSE	FALSE	TRUE	FALSE	FALSE	Annelida	72	Pagurus bernhardus	TRUE	TRUE	TRUE	17, 209, 72	Arthropoda	TRUE
Polybius henslowii	FALSE	FALSE	FALSE	TRUE	FALSE	Arthropoda	73	Paracalanus parvus	FALSE	FALSE	TRUE	0, 0, 8	Arthropoda	FALSE
Pomacea canaliculata	FALSE	FALSE	FALSE	TRUE	FALSE	Mollusca	74	Pariambus typicus	TRUE	TRUE	FALSE	15, 70, 0	Arthropoda	TRUE
Protodriloides chaetifer	TRUE	FALSE	FALSE	FALSE	FALSE	Annelida	75	Pholoe baltica	TRUE	TRUE	FALSE	32, 211, 0	Annelida	TRUE
Psammechinus miliaris	FALSE	FALSE	TRUE	FALSE	FALSE	Echinodermata	76	Phyllodoce mucosa	TRUE	TRUE	TRUE	2, 1, 23	Annelida	TRUE
Pseudopolydora pulchra	TRUE	FALSE	FALSE	FALSE	FALSE	Annelida	77	Pinnotheres pisum	TRUE	TRUE	TRUE	218, 1180, 28	Arthropoda	TRUE
Sabellaria spinulosa	FALSE	FALSE	TRUE	FALSE	FALSE	Annelida	78	Pisidia longicornis	TRUE	TRUE	TRUE	300, 398, 1060	Arthropoda	TRUE
Sagartia ornata	FALSE	FALSE	FALSE	TRUE	TRUE	Cnidaria	79	Pocillopora damicornis	FALSE	FALSE	TRUE	0, 0, 461	Cnidaria	FALSE
Scolelepis bonnieri	FALSE	TRUE	TRUE	FALSE	FALSE	Annelida	80	Poecilochaetus serpens	TRUE	TRUE	FALSE	4, 2, 0	Annelida	TRUE
Scoloplos armiger	FALSE	FALSE	TRUE	FALSE	FALSE	Annelida	81	Polybius henslowii	FALSE	FALSE	TRUE	0, 0, 6216	Arthropoda	FALSE
Sigalion mathildae	TRUE	FALSE	FALSE	FALSE	TRUE	Annelida	82	Polygordius appendiculatus	FALSE	FALSE	TRUE	0, 0, 330	Annelida	FALSE
Spio goniocephala	FALSE	TRUE	FALSE	FALSE	TRUE	Annelida	83	Pomacea canaliculata	FALSE	FALSE	TRUE	0, 0, 378	Mollusca	FALSE
Spiophanes bombyx	TRUE	FALSE	TRUE	FALSE	TRUE	Annelida	84	Processa modica	TRUE	TRUE	TRUE	26533, 34619, 17332	Arthropoda	TRUE
Spirobranchus lamarckii	TRUE	FALSE	FALSE	FALSE	FALSE	Annelida	85	Psammechinus miliaris	TRUE	TRUE	FALSE	4, 21, 0	Echinodermata	TRUE
Spisula elliptica	TRUE	TRUE	TRUE	FALSE	FALSE	Mollusca	86	Pseudocuma longicorne	FALSE	TRUE	FALSE	0, 1, 0	Arthropoda	TRUE
Spisula solida	FALSE	FALSE	FALSE	TRUE	TRUE	Mollusca	87	Sabellaria spinulosa	TRUE	TRUE	FALSE	11, 20, 0	Annelida	TRUE
Sthenelais boa	TRUE	FALSE	FALSE	TRUE	TRUE	Annelida	88	Sagartia ornata	FALSE	FALSE	TRUE	0, 0, 64088	Cnidaria	FALSE
Streptodonta pterochaeta	TRUE	FALSE	FALSE	FALSE	FALSE	Annelida	89	Sagartiogeton sp.	TRUE	TRUE	FALSE	108, 18, 0	Cnidaria	FALSE
Tanaissus lilljeborgi	TRUE	FALSE	FALSE	FALSE	FALSE	Arthropoda	90	Sagitta setosa	FALSE	FALSE	TRUE	0, 0, 21	Chaetognatha	FALSE
Tellimya ferruginosa	TRUE	TRUE	TRUE	FALSE	TRUE	Mollusca	91	Scolelepis bonnieri	TRUE	TRUE	FALSE	31923, 48897, 0	Annelida	TRUE
Tryphosa nana	TRUE	FALSE	FALSE	FALSE	FALSE	Arthropoda	92	Scoloplos armiger	TRUE	TRUE	FALSE	22, 49, 0	Annelida	TRUE
Tubificoides diazi	FALSE	FALSE	TRUE	FALSE	FALSE	Annelida	93	Spio decorata	TRUE	FALSE	FALSE	9, 0, 0	Annelida	TRUE
Urothoe brevicornis	TRUE	TRUE	TRUE	FALSE	TRUE	Arthropoda	94	Spio goniocephala	TRUE	FALSE	FALSE	3958, 0, 0	Annelida	TRUE
Venerupis corrugata	TRUE	FALSE	FALSE	TRUE	TRUE	Mollusca	95	Spiophanes bombyx	TRUE	TRUE	TRUE	220, 3146, 1383	Annelida	TRUE
							96	Spiophanes cf.	FALSE	FALSE	TRUE	0, 0, 59	Annelida	FALSE
	57	38	48	36			97	Spisula elliptica	TRUE	TRUE	FALSE	61, 6978, 0	Mollusca	TRUE
							98	Spisula solida	FALSE	FALSE	TRUE	0, 0, 68047	Mollusca	TRUE
							99	Sthenelais boa	FALSE	FALSE	TRUE	0, 0, 4610	Annelida	FALSE
							100	Streptodonta pterochaeta	TRUE	TRUE	FALSE	147, 1255, 0	Annelida	TRUE
							101	Streptosyllis websteri	TRUE	TRUE	FALSE	5, 29, 0	Annelida	TRUE
							102	Strongylocentrotus purpuratus	FALSE	FALSE	TRUE	0, 0, 6	Echinodermata	FALSE
							103	Tellimya ferruginosa	TRUE	TRUE	FALSE	44, 221, 0	Mollusca	TRUE
							104	Temora longicornis	FALSE	FALSE	TRUE	0, 0, 47	Arthropoda	FALSE
							105	Thia scutellata	FALSE	TRUE	FALSE	0, 7, 0	Arthropoda	TRUE
							106	TPA_asm: Ectopleura	FALSE	FALSE	TRUE	0, 0, 54	Cnidaria	FALSE
							107	Tritia reticulata	TRUE	TRUE	TRUE	268, 82, 1400	Mollusca	TRUE
							108	Tubificoides diazi	TRUE	TRUE	TRUE	103, 450, 81	Annelida	TRUE
							109	Urothoe brevicornis	TRUE	TRUE	FALSE	7771, 12471, 0	Arthropoda	TRUE
							110	Venerupis corrugata	FALSE	FALSE	TRUE	0, 0, 5743	Mollusca	FALSE

## Sheet: Sheet1
	Morphology	Miseq	Nanopore	NovaSeq
Abra alba	TRUE	TRUE	TRUE	TRUE
Crepidula fornicata	TRUE	TRUE	TRUE	TRUE
Diogenes pugilator	TRUE	TRUE	TRUE	TRUE
Echinocardium cordatum	TRUE	TRUE	TRUE	TRUE
Macoma balthica	TRUE	TRUE	TRUE	TRUE
Nephtys cirrosa	TRUE	TRUE	TRUE	TRUE
Nephtys hombergii	TRUE	TRUE	TRUE	TRUE
Ophiura albida	TRUE	TRUE	TRUE	TRUE
Ophiura ophiura	TRUE	TRUE	TRUE	TRUE
Owenia fusiformis	TRUE	TRUE	TRUE	TRUE
Pagurus bernhardus	TRUE	TRUE	TRUE	TRUE
Pinnotheres pisum	FALSE	TRUE	TRUE	TRUE
Pisidia longicornis	TRUE	TRUE	TRUE	TRUE
Bathyporeia elegans	TRUE	TRUE	TRUE	FALSE
Bathyporeia guilliamsoniana	TRUE	TRUE	TRUE	FALSE
Cylista troglodytes	FALSE	TRUE	TRUE	FALSE
Eumida mackiei	FALSE	TRUE	TRUE	FALSE
Gastrosaccus spinifer	TRUE	TRUE	TRUE	FALSE
Lagis koreni	TRUE	TRUE	TRUE	FALSE
Liocarcinus holsatus	TRUE	TRUE	TRUE	FALSE
Magelona mirabilis	FALSE	TRUE	TRUE	FALSE
Membranipora membranacea	FALSE	TRUE	TRUE	FALSE
Monocorophium acherusicum	TRUE	TRUE	TRUE	FALSE
Nephtys assimilis	FALSE	TRUE	TRUE	FALSE
Nototropis swammerdamei	FALSE	TRUE	TRUE	FALSE
Ophiothrix fragilis	FALSE	TRUE	TRUE	FALSE
Pariambus typicus	TRUE	TRUE	TRUE	FALSE
Pholoe baltica	TRUE	TRUE	TRUE	FALSE
Scolelepis bonnieri	FALSE	TRUE	TRUE	FALSE
Spisula elliptica	TRUE	TRUE	TRUE	FALSE
Tellimya ferruginosa	TRUE	TRUE	TRUE	FALSE
Urothoe brevicornis	TRUE	TRUE	TRUE	FALSE
Ensis leei	TRUE	FALSE	TRUE	TRUE
Electra pilosa	FALSE	FALSE	TRUE	FALSE
Eucheilota maculata	FALSE	FALSE	TRUE	FALSE
Eunereis longissima	FALSE	FALSE	TRUE	FALSE
Fabulina fabula	TRUE	FALSE	TRUE	FALSE
Loimia ramzega	FALSE	FALSE	TRUE	FALSE
Malmgrenia lunulata	FALSE	FALSE	TRUE	FALSE
Microprotopus maculatus	FALSE	FALSE	TRUE	FALSE
Notomastus latericeus	TRUE	FALSE	TRUE	FALSE
Other	FALSE	FALSE	TRUE	FALSE
Poecilochaetus serpens	FALSE	FALSE	TRUE	FALSE
Psammechinus miliaris	FALSE	FALSE	TRUE	FALSE
Sabellaria spinulosa	FALSE	FALSE	TRUE	FALSE
Scoloplos armiger	FALSE	FALSE	TRUE	FALSE
Spiophanes bombyx	TRUE	FALSE	TRUE	FALSE
Tubificoides diazi	FALSE	FALSE	TRUE	FALSE
Acrocnida brachiata	TRUE	TRUE	FALSE	TRUE
Echinocyamus pusillus	FALSE	TRUE	FALSE	TRUE
Liocarcinus marmoreus	TRUE	TRUE	FALSE	TRUE
Hesionura elongata	TRUE	TRUE	FALSE	FALSE
Magelona johnstoni	TRUE	TRUE	FALSE	FALSE
Spio goniocephala	FALSE	TRUE	FALSE	FALSE
Acraspedanthus ferax	FALSE	FALSE	FALSE	TRUE
Actinia tenebrosa	FALSE	FALSE	FALSE	TRUE
Bathyporeia sp.	FALSE	FALSE	FALSE	TRUE
Glycera alba	FALSE	FALSE	FALSE	TRUE
Glycera lapidum	TRUE	FALSE	FALSE	TRUE
Glycera tridactyla	TRUE	FALSE	FALSE	TRUE
Haloclava producta	FALSE	FALSE	FALSE	TRUE
Hormathia digitata	FALSE	FALSE	FALSE	TRUE
Jesogammarus spinopalpus	FALSE	FALSE	FALSE	TRUE				35
Metridium senile	FALSE	FALSE	FALSE	TRUE
Moerella iridescens	FALSE	FALSE	FALSE	TRUE
Mytilus sp.	FALSE	FALSE	FALSE	TRUE
Pocillopora damicornis	FALSE	FALSE	FALSE	TRUE
Polybius henslowii	FALSE	FALSE	FALSE	TRUE
Pomacea canaliculata	FALSE	FALSE	FALSE	TRUE
Sagartia ornata	FALSE	FALSE	FALSE	TRUE
Spisula solida	FALSE	FALSE	FALSE	TRUE
Sthenelais boa	TRUE	FALSE	FALSE	TRUE
Venerupis corrugata	TRUE	FALSE	FALSE	TRUE
Abludomelita obtusata	TRUE	FALSE	FALSE	FALSE
Aonides oxycephala	TRUE	FALSE	FALSE	FALSE
Aonides paucibranchiata	TRUE	FALSE	FALSE	FALSE
Apolochus neapolitanus	TRUE	FALSE	FALSE	FALSE
Capitella minima	TRUE	FALSE	FALSE	FALSE
Caulleriella alata	TRUE	FALSE	FALSE	FALSE
Eteone longa	TRUE	FALSE	FALSE	FALSE
Eumida sanguinea	TRUE	FALSE	FALSE	FALSE
Harmothoe glabra	TRUE	FALSE	FALSE	FALSE
Kurtiella bidentata	TRUE	FALSE	FALSE	FALSE
Mediomastus fragilis	TRUE	FALSE	FALSE	FALSE
Mytilus edulis	TRUE	FALSE	FALSE	FALSE
Nototropis swammerdami	TRUE	FALSE	FALSE	FALSE
Petricolaria pholadiformis	TRUE	FALSE	FALSE	FALSE
Phyllodoce mucosa	TRUE	FALSE	FALSE	FALSE
Protodriloides chaetifer	TRUE	FALSE	FALSE	FALSE
Pseudopolydora pulchra	TRUE	FALSE	FALSE	FALSE
Sigalion mathildae	TRUE	FALSE	FALSE	FALSE
Spirobranchus lamarckii	TRUE	FALSE	FALSE	FALSE
Streptodonta pterochaeta	TRUE	FALSE	FALSE	FALSE
Tanaissus lilljeborgi	TRUE	FALSE	FALSE	FALSE
Tryphosa nana	TRUE	FALSE	FALSE	FALSE
