# Supplementary material for: Advancing molecular macrobenthos biodiversity monitoring: a comparison between Oxford Nanopore and Illumina based metabarcoding and metagenomics
Source: PeerJ. 2025 Apr 14;13:e19158. doi: 10.7717/peerj.19158 (PMC12005195; doi:10.7717/peerj.19158)
Supplement: Supplemental Information 7 — Represents whether or not the species was present in the GEANS macrobenthos database. [file peerj-13-19158-s007.xlsx]

## Sheet: Table_S7_not_found
	Morphology	Miseq	Nanopore	NovaSeq	Abundance	Phylum	Curated database?
Abludomelita obtusata	TRUE	FALSE	FALSE	FALSE	8, 0, 0, 0	Arthropoda	YES
Aonides oxycephala	TRUE	FALSE	FALSE	FALSE	1, 0, 0, 0	Annelida	NO
Aonides paucibranchiata	TRUE	FALSE	FALSE	FALSE	1, 0, 0, 0	Annelida	YES
Apolochus neapolitanus	TRUE	FALSE	FALSE	FALSE	1, 0, 0, 0	Arthropoda	YES
Capitella minima	TRUE	FALSE	FALSE	FALSE	2, 0, 0, 0	Annelida	NO
Caulleriella alata	TRUE	FALSE	FALSE	FALSE	6, 0, 0, 0	Annelida	NO
Eteone longa	TRUE	FALSE	FALSE	FALSE	5, 0, 0, 0	Annelida	YES
Eumida sanguinea	TRUE	FALSE	FALSE	FALSE	11, 0, 0, 0	Annelida	NO
Harmothoe glabra	TRUE	FALSE	FALSE	FALSE	3, 0, 0, 0	Annelida	NO
Kurtiella bidentata	TRUE	FALSE	FALSE	FALSE	5, 0, 0, 0	Mollusca	NO
Mediomastus fragilis	TRUE	FALSE	FALSE	FALSE	21, 0, 0, 0	Annelida	NO
Mytilus edulis	TRUE	FALSE	FALSE	FALSE	3, 0, 0, 0	Mollusca	YES
Nototropis swammerdami	TRUE	FALSE	FALSE	FALSE	2, 0, 0, 0	Arthropoda	YES
Petricolaria pholadiformis	TRUE	FALSE	FALSE	FALSE	1, 0, 0, 0	Mollusca	NO
Phyllodoce mucosa	TRUE	FALSE	FALSE	FALSE	1, 0, 0, 0	Annelida	YES
Protodriloides chaetifer	TRUE	FALSE	FALSE	FALSE	1, 0, 0, 0	Annelida	NO
Pseudopolydora pulchra	TRUE	FALSE	FALSE	FALSE	1, 0, 0, 0	Annelida	NO
Sigalion mathildae	TRUE	FALSE	FALSE	FALSE	1, 0, 0, 0	Annelida	YES
Spirobranchus lamarckii	TRUE	FALSE	FALSE	FALSE	1, 0, 0, 0	Annelida	NO
Streptodonta pterochaeta	TRUE	FALSE	FALSE	FALSE	1, 0, 0, 0	Annelida	YES
Tanaissus lilljeborgi	TRUE	FALSE	FALSE	FALSE	1, 0, 0, 0	Arthropoda	NO
Tryphosa nana	TRUE	FALSE	FALSE	FALSE	1, 0, 0, 0	Arthropoda	NO
