# Supplementary material for: Advancing molecular macrobenthos biodiversity monitoring: a comparison between Oxford Nanopore and Illumina based metabarcoding and metagenomics
Source: PeerJ. 2025 Apr 14;13:e19158. doi: 10.7717/peerj.19158 (PMC12005195; doi:10.7717/peerj.19158)
Supplement: Supplemental Information 8 — The species that were found in the fraction of reads that remained Singleton after processing the Nanopore reads with Decona. [file peerj-13-19158-s008.xlsx]

## Sheet: singletons_check
38550	raw_singletons_barcode59	4.00E+98	867729f6-499d-4be5-927e-c564020e8601	100	313	0	0	1	313	343	655	1.72E-166	579	314	655	seq4	Bivalvia	Cardiida	Semelidae	Abra	Abra alba	NA	NA	NA	NA	38550
38551	raw_singletons_barcode59	4.00E+98	867729f6-499d-4be5-927e-c564020e8601	100	303	0	0	1	303	343	645	6.21E-161	560	314	645	seq2	Bivalvia	Cardiida	Semelidae	Abra	Abra alba	NA	NA	NA	NA	38551
45909	raw_singletons_barcode64	4.00E+89	e219a521-d0ef-4b3c-b297-73792ea067e8	100	313	0	0	1	313	343	655	1.72E-166	579	314	655	seq4	Bivalvia	Cardiida	Semelidae	Abra	Abra alba	NA	NA	NA	NA	45909
45910	raw_singletons_barcode64	4.00E+89	e219a521-d0ef-4b3c-b297-73792ea067e8	100	303	0	0	1	303	343	645	6.21E-161	560	314	645	seq2	Bivalvia	Cardiida	Semelidae	Abra	Abra alba	NA	NA	NA	NA	45910
45905	raw_singletons_barcode64	4.00E+89	61ded2a7-724d-4167-aeaf-6c5c1e4cb205	99.363	314	1	1	1	313	342	655	3.71E-163	568	314	655	seq4	Bivalvia	Cardiida	Semelidae	Abra	Abra alba	NA	NA	NA	NA	45905
20527	raw_singletons_barcode55	4.00E+97	9cc07985-4bdc-4f82-b1bf-19cbc935bbfd	99.353	309	1	1	1	308	345	653	2.20E-160	558	310	655	seq4	Bivalvia	Cardiida	Semelidae	Abra	Abra alba	NA	NA	NA	NA	20527
45906	raw_singletons_barcode64	4.00E+89	61ded2a7-724d-4167-aeaf-6c5c1e4cb205	99.342	304	1	1	1	303	342	645	1.34E-157	549	314	645	seq3	Bivalvia	Cardiida	Semelidae	Abra	Abra alba	NA	NA	NA	NA	45906
45907	raw_singletons_barcode64	4.00E+89	61ded2a7-724d-4167-aeaf-6c5c1e4cb205	99.342	304	1	1	1	303	342	645	1.34E-157	549	314	645	seq2	Bivalvia	Cardiida	Semelidae	Abra	Abra alba	NA	NA	NA	NA	45907
38552	raw_singletons_barcode59	4.00E+98	867729f6-499d-4be5-927e-c564020e8601	99.34	303	2	0	1	303	343	645	1.34E-157	549	314	645	seq3	Bivalvia	Cardiida	Semelidae	Abra	Abra alba	NA	NA	NA	NA	38552
45911	raw_singletons_barcode64	4.00E+89	e219a521-d0ef-4b3c-b297-73792ea067e8	99.34	303	2	0	1	303	343	645	1.34E-157	549	314	645	seq3	Bivalvia	Cardiida	Semelidae	Abra	Abra alba	NA	NA	NA	NA	45911
20528	raw_singletons_barcode55	4.00E+97	9cc07985-4bdc-4f82-b1bf-19cbc935bbfd	99.336	301	1	1	1	300	345	645	6.17E-156	544	310	645	seq3	Bivalvia	Cardiida	Semelidae	Abra	Abra alba	NA	NA	NA	NA	20528
20529	raw_singletons_barcode55	4.00E+97	9cc07985-4bdc-4f82-b1bf-19cbc935bbfd	99.336	301	1	1	1	300	345	645	6.17E-156	544	310	645	seq2	Bivalvia	Cardiida	Semelidae	Abra	Abra alba	NA	NA	NA	NA	20529
20523	raw_singletons_barcode55	4.00E+97	932a31da-8b25-41e6-b547-94b1c3aa2d95	99.029	309	1	2	5	311	347	655	1.03E-158	553	312	655	seq4	Bivalvia	Cardiida	Semelidae	Abra	Abra alba	NA	NA	NA	NA	20523
20524	raw_singletons_barcode55	4.00E+97	932a31da-8b25-41e6-b547-94b1c3aa2d95	98.997	299	1	2	5	301	347	645	3.74E-153	534	312	645	seq2	Bivalvia	Cardiida	Semelidae	Abra	Abra alba	NA	NA	NA	NA	20524
20531	raw_singletons_barcode55	4.00E+97	c1e7f9b5-b130-4d8e-8577-c583f3c6be94	98.75	240	2	1	72	311	417	655	2.35E-120	425	312	655	seq4	Bivalvia	Cardiida	Semelidae	Abra	Abra alba	NA	NA	NA	NA	20531
20525	raw_singletons_barcode55	4.00E+97	932a31da-8b25-41e6-b547-94b1c3aa2d95	98.328	299	3	2	5	301	347	645	8.10E-150	523	312	645	seq3	Bivalvia	Cardiida	Semelidae	Abra	Abra alba	NA	NA	NA	NA	20525
38546	raw_singletons_barcode59	4.00E+98	214dbb79-62ec-5fa4-bb4d-c3b9a826c4c9	98.101	316	0	4	1	313	343	655	1.74E-156	545	314	655	seq4	Bivalvia	Cardiida	Semelidae	Abra	Abra alba	NA	NA	NA	NA	38546
43174	raw_singletons_barcode62	4.00E+87	4a7cde6f-d165-495e-983b-8a1f01b1adb7	98.046	307	4	2	1	306	350	655	1.32E-152	532	307	655	seq4	Bivalvia	Cardiida	Semelidae	Abra	Abra alba	NA	NA	NA	NA	43174
38547	raw_singletons_barcode59	4.00E+98	214dbb79-62ec-5fa4-bb4d-c3b9a826c4c9	98.039	306	0	4	1	303	343	645	6.30E-151	527	314	645	seq2	Bivalvia	Cardiida	Semelidae	Abra	Abra alba	NA	NA	NA	NA	38547
6201	raw_singletons_barcode50	4.00E+83	a3e09406-050c-4d79-b226-1a87d91d1125	98.039	255	5	0	58	312	404	658	6.51E-126	444	313	658	seq25	Ophiuroidea	Amphilepidida	Amphiuridae	Acrocnida	Acrocnida brachiata	NA	NA	NA	NA	6201
14627	raw_singletons_barcode54	4.00E+85	00748d2d-bc7a-485b-9bb0-1146d7c1f386	99.363	314	1	1	1	314	346	658	3.73E-163	568	315	658	seq133	Malacostraca	Decapoda	Paguridae	Anapagurus	Anapagurus laevis	NA	NA	NA	NA	14627
29230	raw_singletons_barcode57	4.00E+60	c333c489-0d06-4dc1-88e8-14c1dff4414c	99.363	314	1	1	1	313	345	658	3.71E-163	568	314	658	seq133	Malacostraca	Decapoda	Paguridae	Anapagurus	Anapagurus laevis	NA	NA	NA	NA	29230
14628	raw_singletons_barcode54	4.00E+85	00748d2d-bc7a-485b-9bb0-1146d7c1f386	98.726	314	3	1	1	314	347	659	2.24E-160	558	315	659	seq134	Malacostraca	Decapoda	Paguridae	Anapagurus	Anapagurus laevis	NA	NA	NA	NA	14628
14629	raw_singletons_barcode54	4.00E+85	00748d2d-bc7a-485b-9bb0-1146d7c1f386	98.726	314	3	1	1	314	346	658	8.06E-160	556	315	658	seq132	Malacostraca	Decapoda	Paguridae	Anapagurus	Anapagurus laevis	NA	NA	NA	NA	14629
29231	raw_singletons_barcode57	4.00E+60	c333c489-0d06-4dc1-88e8-14c1dff4414c	98.726	314	3	1	1	313	345	658	8.04E-160	556	314	658	seq132	Malacostraca	Decapoda	Paguridae	Anapagurus	Anapagurus laevis	NA	NA	NA	NA	29231
14630	raw_singletons_barcode54	4.00E+85	00748d2d-bc7a-485b-9bb0-1146d7c1f386	98.408	314	4	1	1	314	346	658	3.75E-158	551	315	658	seq135	Malacostraca	Decapoda	Paguridae	Anapagurus	Anapagurus laevis	NA	NA	NA	NA	14630
29232	raw_singletons_barcode57	4.00E+60	c333c489-0d06-4dc1-88e8-14c1dff4414c	98.408	314	4	1	1	313	346	659	1.04E-158	553	314	659	seq134	Malacostraca	Decapoda	Paguridae	Anapagurus	Anapagurus laevis	NA	NA	NA	NA	29232
29233	raw_singletons_barcode57	4.00E+60	c333c489-0d06-4dc1-88e8-14c1dff4414c	98.408	314	4	1	1	313	345	658	3.74E-158	551	314	658	seq135	Malacostraca	Decapoda	Paguridae	Anapagurus	Anapagurus laevis	NA	NA	NA	NA	29233
22860	raw_singletons_barcode56	4.40E+95	3ac5ae76-c504-4aa4-ba2f-942d20d14cde	98.084	261	2	1	1	261	346	603	3.93E-128	451	316	658	seq133	Malacostraca	Decapoda	Paguridae	Anapagurus	Anapagurus laevis	NA	NA	NA	NA	22860
44455	raw_singletons_barcode63	4.04E+92	d53cb5f4-4054-41df-b200-87ab36e361fc	98.403	313	5	0	1	313	346	658	3.74E-158	551	314	658	seq152	Polychaeta	Spionida	Spionidae	Aonides	Aonides paucibranchiata	NA	NA	NA	NA	44455
25871	raw_singletons_barcode56	4.40E+95	22c36c3d-024c-40a0-8023-67db382275fa	98.188	276	5	0	37	312	383	658	1.38E-137	483	313	658	seq152	Polychaeta	Spionida	Spionidae	Aonides	Aonides paucibranchiata	NA	NA	NA	NA	25871
42846	raw_singletons_barcode62	4.00E+87	fffbfaed-e8d8-462d-bcaf-1f5b6d3bc701	100	311	0	0	1	311	348	658	2.20E-165	575	312	658	seq353	Malacostraca	Amphipoda	Bathyporeiidae	Bathyporeia	Bathyporeia elegans	NA	NA	NA	NA	42846
42847	raw_singletons_barcode62	4.00E+87	fffbfaed-e8d8-462d-bcaf-1f5b6d3bc701	100	311	0	0	1	311	348	658	2.20E-165	575	312	658	seq352	Malacostraca	Amphipoda	Bathyporeiidae	Bathyporeia	Bathyporeia elegans	NA	NA	NA	NA	42847
42848	raw_singletons_barcode62	4.00E+87	fffbfaed-e8d8-462d-bcaf-1f5b6d3bc701	100	311	0	0	1	311	348	658	2.20E-165	575	312	658	seq348	Malacostraca	Amphipoda	Bathyporeiidae	Bathyporeia	Bathyporeia elegans	NA	NA	NA	NA	42848
45721	raw_singletons_barcode64	4.00E+89	8e6616bd-f55b-5ec6-942b-1688b1d0f4f8	100	313	0	0	1	313	346	658	1.72E-166	579	314	658	seq353	Malacostraca	Amphipoda	Bathyporeiidae	Bathyporeia	Bathyporeia elegans	NA	NA	NA	NA	45721
45722	raw_singletons_barcode64	4.00E+89	8e6616bd-f55b-5ec6-942b-1688b1d0f4f8	100	313	0	0	1	313	346	658	1.72E-166	579	314	658	seq348	Malacostraca	Amphipoda	Bathyporeiidae	Bathyporeia	Bathyporeia elegans	NA	NA	NA	NA	45722
45723	raw_singletons_barcode64	4.00E+89	8e6616bd-f55b-5ec6-942b-1688b1d0f4f8	100	312	0	0	2	313	347	658	6.17E-166	577	314	658	seq352	Malacostraca	Amphipoda	Bathyporeiidae	Bathyporeia	Bathyporeia elegans	NA	NA	NA	NA	45723
45724	raw_singletons_barcode64	4.00E+89	8e6616bd-f55b-5ec6-942b-1688b1d0f4f8	99.681	313	1	0	1	313	346	658	7.98E-165	573	314	658	seq350	Malacostraca	Amphipoda	Bathyporeiidae	Bathyporeia	Bathyporeia elegans	NA	NA	NA	NA	45724
45725	raw_singletons_barcode64	4.00E+89	8e6616bd-f55b-5ec6-942b-1688b1d0f4f8	99.681	313	1	0	1	313	346	658	7.98E-165	573	314	658	seq349	Malacostraca	Amphipoda	Bathyporeiidae	Bathyporeia	Bathyporeia elegans	NA	NA	NA	NA	45725
42849	raw_singletons_barcode62	4.00E+87	fffbfaed-e8d8-462d-bcaf-1f5b6d3bc701	99.678	311	1	0	1	311	348	658	1.03E-163	569	312	658	seq350	Malacostraca	Amphipoda	Bathyporeiidae	Bathyporeia	Bathyporeia elegans	NA	NA	NA	NA	42849
42850	raw_singletons_barcode62	4.00E+87	fffbfaed-e8d8-462d-bcaf-1f5b6d3bc701	99.678	311	1	0	1	311	348	658	1.03E-163	569	312	658	seq349	Malacostraca	Amphipoda	Bathyporeiidae	Bathyporeia	Bathyporeia elegans	NA	NA	NA	NA	42850
45727	raw_singletons_barcode64	4.00E+89	8e6616bd-f55b-5ec6-942b-1688b1d0f4f8	99.672	305	1	0	1	305	346	650	2.23E-160	558	314	650	seq351	Malacostraca	Amphipoda	Bathyporeiidae	Bathyporeia	Bathyporeia elegans	NA	NA	NA	NA	45727
42852	raw_singletons_barcode62	4.00E+87	fffbfaed-e8d8-462d-bcaf-1f5b6d3bc701	99.67	303	1	0	1	303	348	650	2.87E-159	555	312	650	seq351	Malacostraca	Amphipoda	Bathyporeiidae	Bathyporeia	Bathyporeia elegans	NA	NA	NA	NA	42852
45726	raw_singletons_barcode64	4.00E+89	8e6616bd-f55b-5ec6-942b-1688b1d0f4f8	99.361	313	2	0	1	313	346	658	3.71E-163	568	314	658	seq354	Malacostraca	Amphipoda	Bathyporeiidae	Bathyporeia	Bathyporeia elegans	NA	NA	NA	NA	45726
42851	raw_singletons_barcode62	4.00E+87	fffbfaed-e8d8-462d-bcaf-1f5b6d3bc701	99.357	311	2	0	1	311	348	658	4.77E-162	564	312	658	seq354	Malacostraca	Amphipoda	Bathyporeiidae	Bathyporeia	Bathyporeia elegans	NA	NA	NA	NA	42851
42829	raw_singletons_barcode62	4.00E+87	b0174d62-474c-4bac-9bcd-1b9069230ad7	99.291	282	1	1	32	312	377	658	2.27E-145	508	313	658	seq353	Malacostraca	Amphipoda	Bathyporeiidae	Bathyporeia	Bathyporeia elegans	NA	NA	NA	NA	42829
42830	raw_singletons_barcode62	4.00E+87	b0174d62-474c-4bac-9bcd-1b9069230ad7	99.291	282	1	1	32	312	377	658	2.27E-145	508	313	658	seq352	Malacostraca	Amphipoda	Bathyporeiidae	Bathyporeia	Bathyporeia elegans	NA	NA	NA	NA	42830
42831	raw_singletons_barcode62	4.00E+87	b0174d62-474c-4bac-9bcd-1b9069230ad7	99.291	282	1	1	32	312	377	658	2.27E-145	508	313	658	seq348	Malacostraca	Amphipoda	Bathyporeiidae	Bathyporeia	Bathyporeia elegans	NA	NA	NA	NA	42831
42835	raw_singletons_barcode62	4.00E+87	b0174d62-474c-4bac-9bcd-1b9069230ad7	99.27	274	1	1	32	304	377	650	6.37E-141	494	313	650	seq351	Malacostraca	Amphipoda	Bathyporeiidae	Bathyporeia	Bathyporeia elegans	NA	NA	NA	NA	42835
42832	raw_singletons_barcode62	4.00E+87	b0174d62-474c-4bac-9bcd-1b9069230ad7	98.936	282	2	1	32	312	377	658	1.06E-143	503	313	658	seq350	Malacostraca	Amphipoda	Bathyporeiidae	Bathyporeia	Bathyporeia elegans	NA	NA	NA	NA	42832
42833	raw_singletons_barcode62	4.00E+87	b0174d62-474c-4bac-9bcd-1b9069230ad7	98.936	282	2	1	32	312	377	658	1.06E-143	503	313	658	seq349	Malacostraca	Amphipoda	Bathyporeiidae	Bathyporeia	Bathyporeia elegans	NA	NA	NA	NA	42833
6676	raw_singletons_barcode50	4.00E+83	881ca068-cea5-482f-ab85-970a2ef3e758	98.73	315	1	2	1	314	346	658	8.06E-160	556	315	658	seq352	Malacostraca	Amphipoda	Bathyporeiidae	Bathyporeia	Bathyporeia elegans	NA	NA	NA	NA	6676
6677	raw_singletons_barcode50	4.00E+83	881ca068-cea5-482f-ab85-970a2ef3e758	98.726	314	1	2	2	314	347	658	2.90E-159	555	315	658	seq353	Malacostraca	Amphipoda	Bathyporeiidae	Bathyporeia	Bathyporeia elegans	NA	NA	NA	NA	6677
6678	raw_singletons_barcode50	4.00E+83	881ca068-cea5-482f-ab85-970a2ef3e758	98.726	314	1	2	2	314	347	658	2.90E-159	555	315	658	seq348	Malacostraca	Amphipoda	Bathyporeiidae	Bathyporeia	Bathyporeia elegans	NA	NA	NA	NA	6678
45738	raw_singletons_barcode64	4.00E+89	100f8745-3c19-4bf8-9879-c9a79ac470f2	98.722	313	2	2	1	312	347	658	2.88E-159	555	313	658	seq353	Malacostraca	Amphipoda	Bathyporeiidae	Bathyporeia	Bathyporeia elegans	NA	NA	NA	NA	45738
45739	raw_singletons_barcode64	4.00E+89	100f8745-3c19-4bf8-9879-c9a79ac470f2	98.722	313	2	2	1	312	347	658	2.88E-159	555	313	658	seq352	Malacostraca	Amphipoda	Bathyporeiidae	Bathyporeia	Bathyporeia elegans	NA	NA	NA	NA	45739
45740	raw_singletons_barcode64	4.00E+89	100f8745-3c19-4bf8-9879-c9a79ac470f2	98.722	313	2	2	1	312	347	658	2.88E-159	555	313	658	seq348	Malacostraca	Amphipoda	Bathyporeiidae	Bathyporeia	Bathyporeia elegans	NA	NA	NA	NA	45740
42837	raw_singletons_barcode62	4.00E+87	e173fa10-5ced-51ee-a040-9120c6e1960f	98.714	311	3	1	1	310	348	658	3.70E-158	551	311	658	seq353	Malacostraca	Amphipoda	Bathyporeiidae	Bathyporeia	Bathyporeia elegans	NA	NA	NA	NA	42837
42838	raw_singletons_barcode62	4.00E+87	e173fa10-5ced-51ee-a040-9120c6e1960f	98.714	311	3	1	1	310	348	658	3.70E-158	551	311	658	seq352	Malacostraca	Amphipoda	Bathyporeiidae	Bathyporeia	Bathyporeia elegans	NA	NA	NA	NA	42838
42839	raw_singletons_barcode62	4.00E+87	e173fa10-5ced-51ee-a040-9120c6e1960f	98.714	311	3	1	1	310	348	658	3.70E-158	551	311	658	seq348	Malacostraca	Amphipoda	Bathyporeiidae	Bathyporeia	Bathyporeia elegans	NA	NA	NA	NA	42839
42834	raw_singletons_barcode62	4.00E+87	b0174d62-474c-4bac-9bcd-1b9069230ad7	98.582	282	3	1	32	312	377	658	4.92E-142	497	313	658	seq354	Malacostraca	Amphipoda	Bathyporeiidae	Bathyporeia	Bathyporeia elegans	NA	NA	NA	NA	42834
6685	raw_singletons_barcode50	4.00E+83	c6c53203-0fc8-47bc-89d3-4423be15bca5	98.577	281	3	1	33	312	378	658	1.77E-141	496	313	658	seq353	Malacostraca	Amphipoda	Bathyporeiidae	Bathyporeia	Bathyporeia elegans	NA	NA	NA	NA	6685
6686	raw_singletons_barcode50	4.00E+83	c6c53203-0fc8-47bc-89d3-4423be15bca5	98.577	281	3	1	33	312	378	658	1.77E-141	496	313	658	seq352	Malacostraca	Amphipoda	Bathyporeiidae	Bathyporeia	Bathyporeia elegans	NA	NA	NA	NA	6686
6687	raw_singletons_barcode50	4.00E+83	c6c53203-0fc8-47bc-89d3-4423be15bca5	98.577	281	3	1	33	312	378	658	1.77E-141	496	313	658	seq348	Malacostraca	Amphipoda	Bathyporeiidae	Bathyporeia	Bathyporeia elegans	NA	NA	NA	NA	6687
6691	raw_singletons_barcode50	4.00E+83	c6c53203-0fc8-47bc-89d3-4423be15bca5	98.535	273	3	1	33	304	378	650	4.96E-137	481	313	650	seq351	Malacostraca	Amphipoda	Bathyporeiidae	Bathyporeia	Bathyporeia elegans	NA	NA	NA	NA	6691
6679	raw_singletons_barcode50	4.00E+83	881ca068-cea5-482f-ab85-970a2ef3e758	98.408	314	2	2	2	314	347	658	1.35E-157	549	315	658	seq350	Malacostraca	Amphipoda	Bathyporeiidae	Bathyporeia	Bathyporeia elegans	NA	NA	NA	NA	6679
6680	raw_singletons_barcode50	4.00E+83	881ca068-cea5-482f-ab85-970a2ef3e758	98.408	314	2	2	2	314	347	658	1.35E-157	549	315	658	seq349	Malacostraca	Amphipoda	Bathyporeiidae	Bathyporeia	Bathyporeia elegans	NA	NA	NA	NA	6680
45741	raw_singletons_barcode64	4.00E+89	100f8745-3c19-4bf8-9879-c9a79ac470f2	98.403	313	3	2	1	312	347	658	1.34E-157	549	313	658	seq350	Malacostraca	Amphipoda	Bathyporeiidae	Bathyporeia	Bathyporeia elegans	NA	NA	NA	NA	45741
45742	raw_singletons_barcode64	4.00E+89	100f8745-3c19-4bf8-9879-c9a79ac470f2	98.403	313	3	2	1	312	347	658	1.34E-157	549	313	658	seq349	Malacostraca	Amphipoda	Bathyporeiidae	Bathyporeia	Bathyporeia elegans	NA	NA	NA	NA	45742
42840	raw_singletons_barcode62	4.00E+87	e173fa10-5ced-51ee-a040-9120c6e1960f	98.392	311	4	1	1	310	348	658	1.72E-156	545	311	658	seq350	Malacostraca	Amphipoda	Bathyporeiidae	Bathyporeia	Bathyporeia elegans	NA	NA	NA	NA	42840
42841	raw_singletons_barcode62	4.00E+87	e173fa10-5ced-51ee-a040-9120c6e1960f	98.392	311	4	1	1	310	348	658	1.72E-156	545	311	658	seq349	Malacostraca	Amphipoda	Bathyporeiidae	Bathyporeia	Bathyporeia elegans	NA	NA	NA	NA	42841
6682	raw_singletons_barcode50	4.00E+83	881ca068-cea5-482f-ab85-970a2ef3e758	98.366	306	2	2	2	306	347	650	3.78E-153	534	315	650	seq351	Malacostraca	Amphipoda	Bathyporeiidae	Bathyporeia	Bathyporeia elegans	NA	NA	NA	NA	6682
45744	raw_singletons_barcode64	4.00E+89	100f8745-3c19-4bf8-9879-c9a79ac470f2	98.361	305	3	2	1	304	347	650	3.75E-153	534	313	650	seq351	Malacostraca	Amphipoda	Bathyporeiidae	Bathyporeia	Bathyporeia elegans	NA	NA	NA	NA	45744
42843	raw_singletons_barcode62	4.00E+87	e173fa10-5ced-51ee-a040-9120c6e1960f	98.35	303	4	1	1	302	348	650	4.82E-152	531	311	650	seq351	Malacostraca	Amphipoda	Bathyporeiidae	Bathyporeia	Bathyporeia elegans	NA	NA	NA	NA	42843
13532	raw_singletons_barcode51	4.00E+99	623d0cee-0eda-403b-8125-9b6a62c2d4f1	98.239	284	3	2	2	284	347	629	1.75E-141	496	310	650	seq351	Malacostraca	Amphipoda	Bathyporeiidae	Bathyporeia	Bathyporeia elegans	NA	NA	NA	NA	13532
6688	raw_singletons_barcode50	4.00E+83	c6c53203-0fc8-47bc-89d3-4423be15bca5	98.221	281	4	1	33	312	378	658	8.24E-140	490	313	658	seq350	Malacostraca	Amphipoda	Bathyporeiidae	Bathyporeia	Bathyporeia elegans	NA	NA	NA	NA	6688
6689	raw_singletons_barcode50	4.00E+83	c6c53203-0fc8-47bc-89d3-4423be15bca5	98.221	281	4	1	33	312	378	658	8.24E-140	490	313	658	seq349	Malacostraca	Amphipoda	Bathyporeiidae	Bathyporeia	Bathyporeia elegans	NA	NA	NA	NA	6689
6681	raw_singletons_barcode50	4.00E+83	881ca068-cea5-482f-ab85-970a2ef3e758	98.089	314	3	2	2	314	347	658	6.28E-156	544	315	658	seq354	Malacostraca	Amphipoda	Bathyporeiidae	Bathyporeia	Bathyporeia elegans	NA	NA	NA	NA	6681
45743	raw_singletons_barcode64	4.00E+89	100f8745-3c19-4bf8-9879-c9a79ac470f2	98.083	313	4	2	1	312	347	658	6.24E-156	544	313	658	seq354	Malacostraca	Amphipoda	Bathyporeiidae	Bathyporeia	Bathyporeia elegans	NA	NA	NA	NA	45743
42842	raw_singletons_barcode62	4.00E+87	e173fa10-5ced-51ee-a040-9120c6e1960f	98.071	311	5	1	1	310	348	658	8.01E-155	540	311	658	seq354	Malacostraca	Amphipoda	Bathyporeiidae	Bathyporeia	Bathyporeia elegans	NA	NA	NA	NA	42842
41797	raw_singletons_barcode62	4.00E+87	7e1a8e3c-4f2d-447b-bb93-ebba9464aaf2	100	313	0	0	1	313	346	658	1.72E-166	579	314	658	seq355	Malacostraca	Amphipoda	Bathyporeiidae	Bathyporeia	Bathyporeia guilliamsoniana	NA	NA	NA	NA	41797
13188	raw_singletons_barcode51	4.00E+99	414d5005-5f03-4b2b-8353-3b240ec981be	98.897	272	1	2	1	270	346	617	3.82E-138	484	312	658	seq355	Malacostraca	Amphipoda	Bathyporeiidae	Bathyporeia	Bathyporeia guilliamsoniana	NA	NA	NA	NA	13188
33145	raw_singletons_barcode58	4.00E+94	7afa555c-8b9b-45b6-9adc-786a8827c7b1	98.734	237	3	0	76	312	422	658	3.05E-119	422	313	658	seq355	Malacostraca	Amphipoda	Bathyporeiidae	Bathyporeia	Bathyporeia guilliamsoniana	NA	NA	NA	NA	33145
29549	raw_singletons_barcode57	4.00E+60	6332b09e-d48a-4dbb-ab60-2b7883b8e4ca	98.726	314	0	2	1	311	346	658	2.87E-159	555	312	658	seq355	Malacostraca	Amphipoda	Bathyporeiidae	Bathyporeia	Bathyporeia guilliamsoniana	NA	NA	NA	NA	29549
15588	raw_singletons_barcode54	4.00E+85	1301f8a6-e165-482c-84d0-a1c66ff56b89	98.083	313	0	2	1	307	346	658	7.93E-155	540	308	658	seq355	Malacostraca	Amphipoda	Bathyporeiidae	Bathyporeia	Bathyporeia guilliamsoniana	NA	NA	NA	NA	15588
11800	raw_singletons_barcode51	4.00E+99	fd241deb-78b7-4987-b9cf-da1a4e39f57d	98.083	313	6	0	1	313	346	658	4.84E-157	547	314	658	seq504	Malacostraca	Decapoda	Crangonidae	Crangon	Crangon crangon	NA	NA	NA	NA	11800
11801	raw_singletons_barcode51	4.00E+99	fd241deb-78b7-4987-b9cf-da1a4e39f57d	98.083	313	6	0	1	313	346	658	1.74E-156	545	314	658	seq506	Malacostraca	Decapoda	Crangonidae	Crangon	Crangon crangon	NA	NA	NA	NA	11801
3950	raw_singletons_barcode49	4.00E+97	7fb24ae1-0e04-4c69-8557-82e64f37c247	99.609	256	1	0	57	312	405	660	3.85E-133	468	312	663	seq510	Gastropoda	Littorinimorpha	Calyptraeidae	Crepidula	Crepidula fornicata	NA	NA	NA	NA	3950
3951	raw_singletons_barcode49	4.00E+97	7fb24ae1-0e04-4c69-8557-82e64f37c247	99.608	255	1	0	57	311	404	658	1.38E-132	466	312	658	seq513	Gastropoda	Littorinimorpha	Calyptraeidae	Crepidula	Crepidula fornicata	NA	NA	NA	NA	3951
3952	raw_singletons_barcode49	4.00E+97	7fb24ae1-0e04-4c69-8557-82e64f37c247	99.588	243	1	0	57	299	404	646	6.48E-126	444	312	648	seq511	Gastropoda	Littorinimorpha	Calyptraeidae	Crepidula	Crepidula fornicata	NA	NA	NA	NA	3952
44277	raw_singletons_barcode63	4.04E+92	6c22ca8a-8093-4c30-8d14-2a69760546c5	99.267	273	2	0	1	273	346	618	6.39E-141	494	314	621	seq507	Gastropoda	Littorinimorpha	Calyptraeidae	Crepidula	Crepidula fornicata	NA	NA	NA	NA	44277
44261	raw_singletons_barcode63	4.04E+92	0b137ba0-6e25-4783-bbe2-03726d40978a	98.535	273	4	0	1	273	346	618	1.38E-137	483	314	621	seq507	Gastropoda	Littorinimorpha	Calyptraeidae	Crepidula	Crepidula fornicata	NA	NA	NA	NA	44261
41607	raw_singletons_barcode61	4.00E+95	5abab425-a6d2-4f31-b12d-bfd98f9fcf74	99.361	313	0	2	1	311	346	658	1.33E-162	566	312	658	seq1716	Anthozoa	Actiniaria	Sagartiidae	Cylista	Cylista troglodytes	NA	NA	NA	NA	41607
11926	raw_singletons_barcode51	4.00E+99	aed9d610-a3f9-455d-9970-d05881a49c20	98.837	258	2	1	56	312	401	658	2.32E-130	459	313	658	seq649	Echinoidea	Spatangoida	Loveniidae	Echinocardium	Echinocardium cordatum	NA	NA	NA	NA	11926
11927	raw_singletons_barcode51	4.00E+99	aed9d610-a3f9-455d-9970-d05881a49c20	98.837	258	2	1	56	312	401	658	2.32E-130	459	313	658	seq648	Echinoidea	Spatangoida	Loveniidae	Echinocardium	Echinocardium cordatum	NA	NA	NA	NA	11927
11928	raw_singletons_barcode51	4.00E+99	aed9d610-a3f9-455d-9970-d05881a49c20	98.837	258	2	1	56	312	401	658	2.32E-130	459	313	658	seq644	Echinoidea	Spatangoida	Loveniidae	Echinocardium	Echinocardium cordatum	NA	NA	NA	NA	11928
6888	raw_singletons_barcode50	4.00E+83	24ba90cb-9932-45ac-84dd-cfd3f2c4d6e2	98.545	275	3	1	2	275	348	622	3.66E-138	484	300	658	seq651	Echinoidea	Spatangoida	Loveniidae	Echinocardium	Echinocardium cordatum	NA	NA	NA	NA	6888
6889	raw_singletons_barcode50	4.00E+83	24ba90cb-9932-45ac-84dd-cfd3f2c4d6e2	98.545	275	3	1	2	275	348	622	3.66E-138	484	300	658	seq649	Echinoidea	Spatangoida	Loveniidae	Echinocardium	Echinocardium cordatum	NA	NA	NA	NA	6889
6890	raw_singletons_barcode50	4.00E+83	24ba90cb-9932-45ac-84dd-cfd3f2c4d6e2	98.545	275	3	1	2	275	348	622	3.66E-138	484	300	658	seq648	Echinoidea	Spatangoida	Loveniidae	Echinocardium	Echinocardium cordatum	NA	NA	NA	NA	6890
6891	raw_singletons_barcode50	4.00E+83	24ba90cb-9932-45ac-84dd-cfd3f2c4d6e2	98.545	275	3	1	2	275	348	622	3.66E-138	484	300	658	seq646	Echinoidea	Spatangoida	Loveniidae	Echinocardium	Echinocardium cordatum	NA	NA	NA	NA	6891
6892	raw_singletons_barcode50	4.00E+83	24ba90cb-9932-45ac-84dd-cfd3f2c4d6e2	98.545	275	3	1	2	275	348	622	3.66E-138	484	300	658	seq644	Echinoidea	Spatangoida	Loveniidae	Echinocardium	Echinocardium cordatum	NA	NA	NA	NA	6892
6893	raw_singletons_barcode50	4.00E+83	24ba90cb-9932-45ac-84dd-cfd3f2c4d6e2	98.535	273	3	1	4	275	350	622	4.74E-137	481	300	658	seq654	Echinoidea	Spatangoida	Loveniidae	Echinocardium	Echinocardium cordatum	NA	NA	NA	NA	6893
11929	raw_singletons_barcode51	4.00E+99	aed9d610-a3f9-455d-9970-d05881a49c20	98.45	258	3	1	56	312	401	658	1.08E-128	453	313	658	seq654	Echinoidea	Spatangoida	Loveniidae	Echinocardium	Echinocardium cordatum	NA	NA	NA	NA	11929
11930	raw_singletons_barcode51	4.00E+99	aed9d610-a3f9-455d-9970-d05881a49c20	98.45	258	3	1	56	312	401	658	1.08E-128	453	313	658	seq652	Echinoidea	Spatangoida	Loveniidae	Echinocardium	Echinocardium cordatum	NA	NA	NA	NA	11930
11931	raw_singletons_barcode51	4.00E+99	aed9d610-a3f9-455d-9970-d05881a49c20	98.45	258	3	1	56	312	401	658	1.08E-128	453	313	658	seq650	Echinoidea	Spatangoida	Loveniidae	Echinocardium	Echinocardium cordatum	NA	NA	NA	NA	11931
11932	raw_singletons_barcode51	4.00E+99	aed9d610-a3f9-455d-9970-d05881a49c20	98.45	258	3	1	56	312	401	658	1.08E-128	453	313	658	seq647	Echinoidea	Spatangoida	Loveniidae	Echinocardium	Echinocardium cordatum	NA	NA	NA	NA	11932
11933	raw_singletons_barcode51	4.00E+99	aed9d610-a3f9-455d-9970-d05881a49c20	98.45	258	3	1	56	312	401	658	1.08E-128	453	313	658	seq643	Echinoidea	Spatangoida	Loveniidae	Echinocardium	Echinocardium cordatum	NA	NA	NA	NA	11933
11936	raw_singletons_barcode51	4.00E+99	aed9d610-a3f9-455d-9970-d05881a49c20	98.419	253	3	1	56	307	401	653	6.51E-126	444	313	653	seq653	Echinoidea	Spatangoida	Loveniidae	Echinocardium	Echinocardium cordatum	NA	NA	NA	NA	11936
44822	raw_singletons_barcode63	4.04E+92	bf0bbb53-1bf1-5110-af4c-fea4461df047	98.381	247	2	1	1	245	348	594	1.36E-122	433	303	658	seq647	Echinoidea	Spatangoida	Loveniidae	Echinocardium	Echinocardium cordatum	NA	NA	NA	NA	44822
4357	raw_singletons_barcode49	4.00E+97	0a802202-1bf2-58a8-8392-ee29c3f594d9	98.291	234	1	1	80	310	425	658	8.48E-115	407	311	658	seq651	Echinoidea	Spatangoida	Loveniidae	Echinocardium	Echinocardium cordatum	NA	NA	NA	NA	4357
4358	raw_singletons_barcode49	4.00E+97	0a802202-1bf2-58a8-8392-ee29c3f594d9	98.291	234	1	1	80	310	425	658	8.48E-115	407	311	658	seq649	Echinoidea	Spatangoida	Loveniidae	Echinocardium	Echinocardium cordatum	NA	NA	NA	NA	4358
4359	raw_singletons_barcode49	4.00E+97	0a802202-1bf2-58a8-8392-ee29c3f594d9	98.291	234	1	1	80	310	425	658	8.48E-115	407	311	658	seq648	Echinoidea	Spatangoida	Loveniidae	Echinocardium	Echinocardium cordatum	NA	NA	NA	NA	4359
4360	raw_singletons_barcode49	4.00E+97	0a802202-1bf2-58a8-8392-ee29c3f594d9	98.291	234	1	1	80	310	425	658	8.48E-115	407	311	658	seq646	Echinoidea	Spatangoida	Loveniidae	Echinocardium	Echinocardium cordatum	NA	NA	NA	NA	4360
4361	raw_singletons_barcode49	4.00E+97	0a802202-1bf2-58a8-8392-ee29c3f594d9	98.291	234	1	1	80	310	425	658	8.48E-115	407	311	658	seq644	Echinoidea	Spatangoida	Loveniidae	Echinocardium	Echinocardium cordatum	NA	NA	NA	NA	4361
6894	raw_singletons_barcode50	4.00E+83	24ba90cb-9932-45ac-84dd-cfd3f2c4d6e2	98.182	275	4	1	2	275	348	622	1.70E-136	479	300	653	seq653	Echinoidea	Spatangoida	Loveniidae	Echinocardium	Echinocardium cordatum	NA	NA	NA	NA	6894
6895	raw_singletons_barcode50	4.00E+83	24ba90cb-9932-45ac-84dd-cfd3f2c4d6e2	98.182	275	4	1	2	275	348	622	1.70E-136	479	300	658	seq652	Echinoidea	Spatangoida	Loveniidae	Echinocardium	Echinocardium cordatum	NA	NA	NA	NA	6895
6896	raw_singletons_barcode50	4.00E+83	24ba90cb-9932-45ac-84dd-cfd3f2c4d6e2	98.182	275	4	1	2	275	348	622	1.70E-136	479	300	658	seq650	Echinoidea	Spatangoida	Loveniidae	Echinocardium	Echinocardium cordatum	NA	NA	NA	NA	6896
6897	raw_singletons_barcode50	4.00E+83	24ba90cb-9932-45ac-84dd-cfd3f2c4d6e2	98.182	275	4	1	2	275	348	622	1.70E-136	479	300	658	seq647	Echinoidea	Spatangoida	Loveniidae	Echinocardium	Echinocardium cordatum	NA	NA	NA	NA	6897
6898	raw_singletons_barcode50	4.00E+83	24ba90cb-9932-45ac-84dd-cfd3f2c4d6e2	98.182	275	4	1	2	275	348	622	1.70E-136	479	300	658	seq643	Echinoidea	Spatangoida	Loveniidae	Echinocardium	Echinocardium cordatum	NA	NA	NA	NA	6898
6899	raw_singletons_barcode50	4.00E+83	24ba90cb-9932-45ac-84dd-cfd3f2c4d6e2	98.182	275	4	1	2	275	348	622	1.70E-136	479	300	658	seq642	Echinoidea	Spatangoida	Loveniidae	Echinocardium	Echinocardium cordatum	NA	NA	NA	NA	6899
11934	raw_singletons_barcode51	4.00E+99	aed9d610-a3f9-455d-9970-d05881a49c20	98.062	258	4	1	56	312	401	658	5.03E-127	448	313	658	seq651	Echinoidea	Spatangoida	Loveniidae	Echinocardium	Echinocardium cordatum	NA	NA	NA	NA	11934
11935	raw_singletons_barcode51	4.00E+99	aed9d610-a3f9-455d-9970-d05881a49c20	98.062	258	4	1	56	312	401	658	5.03E-127	448	313	658	seq646	Echinoidea	Spatangoida	Loveniidae	Echinocardium	Echinocardium cordatum	NA	NA	NA	NA	11935
37713	raw_singletons_barcode59	4.00E+98	0479da6c-381d-4e6a-80a6-d5d4bcbe2b05	99.363	314	1	1	1	314	346	658	3.73E-163	568	315	658	seq680	Gymnolaemata	Cheilostomatida	Electridae	Electra	Electra pilosa	NA	NA	NA	NA	37713
37714	raw_singletons_barcode59	4.00E+98	0479da6c-381d-4e6a-80a6-d5d4bcbe2b05	99.363	314	1	1	1	314	346	658	3.73E-163	568	315	658	seq679	Gymnolaemata	Cheilostomatida	Electridae	Electra	Electra pilosa	NA	NA	NA	NA	37714
6310	raw_singletons_barcode50	4.00E+83	23768ef1-f015-4480-8d32-e556ae98417c	99.048	315	1	1	1	315	346	658	4.84E-162	564	316	658	seq680	Gymnolaemata	Cheilostomatida	Electridae	Electra	Electra pilosa	NA	NA	NA	NA	6310
6311	raw_singletons_barcode50	4.00E+83	23768ef1-f015-4480-8d32-e556ae98417c	99.048	315	1	1	1	315	346	658	4.84E-162	564	316	658	seq679	Gymnolaemata	Cheilostomatida	Electridae	Electra	Electra pilosa	NA	NA	NA	NA	6311
24118	raw_singletons_barcode56	4.40E+95	3b3f6a21-abd9-4ffe-b5df-b4045db64207	99	300	2	1	15	314	360	658	1.05E-153	536	315	658	seq680	Gymnolaemata	Cheilostomatida	Electridae	Electra	Electra pilosa	NA	NA	NA	NA	24118
24119	raw_singletons_barcode56	4.40E+95	3b3f6a21-abd9-4ffe-b5df-b4045db64207	99	300	2	1	15	314	360	658	1.05E-153	536	315	658	seq679	Gymnolaemata	Cheilostomatida	Electridae	Electra	Electra pilosa	NA	NA	NA	NA	24119
6296	raw_singletons_barcode50	4.00E+83	eee7b86b-e4d9-476f-89bc-14a6a1cc2778	98.408	314	4	1	1	314	346	658	3.75E-158	551	315	658	seq680	Gymnolaemata	Cheilostomatida	Electridae	Electra	Electra pilosa	NA	NA	NA	NA	6296
6297	raw_singletons_barcode50	4.00E+83	eee7b86b-e4d9-476f-89bc-14a6a1cc2778	98.408	314	4	1	1	314	346	658	3.75E-158	551	315	658	seq679	Gymnolaemata	Cheilostomatida	Electridae	Electra	Electra pilosa	NA	NA	NA	NA	6297
46141	raw_singletons_barcode64	4.00E+89	c57c30ad-3793-4a44-87c6-f28403d16986	98.408	314	2	3	1	312	346	658	1.34E-157	549	313	658	seq680	Gymnolaemata	Cheilostomatida	Electridae	Electra	Electra pilosa	NA	NA	NA	NA	46141
46142	raw_singletons_barcode64	4.00E+89	c57c30ad-3793-4a44-87c6-f28403d16986	98.408	314	2	3	1	312	346	658	1.34E-157	549	313	658	seq679	Gymnolaemata	Cheilostomatida	Electridae	Electra	Electra pilosa	NA	NA	NA	NA	46142
29443	raw_singletons_barcode57	4.00E+60	c1d35bad-325b-4553-b871-4d9c20fbe1c8	99.042	313	3	0	1	313	346	658	1.73E-161	562	314	658	seq695	Bivalvia	Adapedonta	Pharidae	Ensis	Ensis leei	NA	NA	NA	NA	29443
29439	raw_singletons_barcode57	4.00E+60	3cc502a2-00ef-48ce-b3d0-7d8bca368b2d	98.722	313	4	0	1	313	346	658	8.04E-160	556	314	658	seq695	Bivalvia	Adapedonta	Pharidae	Ensis	Ensis leei	NA	NA	NA	NA	29439
29444	raw_singletons_barcode57	4.00E+60	c1d35bad-325b-4553-b871-4d9c20fbe1c8	98.403	313	5	0	1	313	346	658	3.74E-158	551	314	658	seq696	Bivalvia	Adapedonta	Pharidae	Ensis	Ensis leei	NA	NA	NA	NA	29444
29440	raw_singletons_barcode57	4.00E+60	3cc502a2-00ef-48ce-b3d0-7d8bca368b2d	98.083	313	6	0	1	313	346	658	1.74E-156	545	314	658	seq696	Bivalvia	Adapedonta	Pharidae	Ensis	Ensis leei	NA	NA	NA	NA	29440
42718	raw_singletons_barcode62	4.00E+87	d5bedba8-f012-4105-8a7a-84bf1ea843d2	98.083	313	6	0	1	313	346	658	1.74E-156	545	314	658	seq695	Bivalvia	Adapedonta	Pharidae	Ensis	Ensis leei	NA	NA	NA	NA	42718
46017	raw_singletons_barcode64	4.00E+89	482fbffd-c5fd-45fb-9b01-ae6aa6ecbc12	98.083	313	6	0	1	313	346	658	1.74E-156	545	314	658	seq696	Bivalvia	Adapedonta	Pharidae	Ensis	Ensis leei	NA	NA	NA	NA	46017
46018	raw_singletons_barcode64	4.00E+89	482fbffd-c5fd-45fb-9b01-ae6aa6ecbc12	98.083	313	6	0	1	313	346	658	1.74E-156	545	314	658	seq695	Bivalvia	Adapedonta	Pharidae	Ensis	Ensis leei	NA	NA	NA	NA	46018
37631	raw_singletons_barcode59	4.00E+98	e552cf55-4f82-4904-8353-f70093041c96	100	284	0	0	31	314	369	652	2.27E-150	525	314	657	seq743	Hydrozoa	Leptothecata	Lovenellidae	Eucheilota	Eucheilota maculata	NA	NA	NA	NA	37631
2662	raw_singletons_barcode49	4.00E+97	2ae47485-6123-4911-9f77-8976e48375fc	99.682	314	1	0	1	314	339	652	2.22E-165	575	314	657	seq743	Hydrozoa	Leptothecata	Lovenellidae	Eucheilota	Eucheilota maculata	NA	NA	NA	NA	2662
41551	raw_singletons_barcode61	4.00E+95	a9e7b5bc-91a6-4cd7-8d17-730ade87edfc	99.363	314	1	1	1	313	339	652	3.70E-163	568	313	657	seq743	Hydrozoa	Leptothecata	Lovenellidae	Eucheilota	Eucheilota maculata	NA	NA	NA	NA	41551
33901	raw_singletons_barcode58	4.00E+94	e19be215-e80e-4dbd-b680-e3a33d157eec	98.969	291	2	1	24	314	363	652	1.05E-148	520	314	657	seq743	Hydrozoa	Leptothecata	Lovenellidae	Eucheilota	Eucheilota maculata	NA	NA	NA	NA	33901
45919	raw_singletons_barcode64	4.00E+89	d0fd1876-8829-52d4-953e-cc20901af937	99.045	314	2	1	1	314	346	658	1.73E-161	562	315	658	seq750	Polychaeta	Phyllodocida	Phyllodocidae	Eumida	Eumida mackiei	NA	NA	NA	NA	45919
45920	raw_singletons_barcode64	4.00E+89	d0fd1876-8829-52d4-953e-cc20901af937	98.726	314	3	1	1	314	346	658	8.06E-160	556	315	658	seq749	Polychaeta	Phyllodocida	Phyllodocidae	Eumida	Eumida mackiei	NA	NA	NA	NA	45920
45921	raw_singletons_barcode64	4.00E+89	d0fd1876-8829-52d4-953e-cc20901af937	98.726	314	3	1	1	314	346	658	8.06E-160	556	315	658	seq747	Polychaeta	Phyllodocida	Phyllodocidae	Eumida	Eumida mackiei	NA	NA	NA	NA	45921
29257	raw_singletons_barcode57	4.00E+60	bf784f49-2980-421a-9b22-5acd34ae892d	98.566	279	4	0	36	314	380	658	6.41E-141	494	315	658	seq747	Polychaeta	Phyllodocida	Phyllodocidae	Eumida	Eumida mackiei	NA	NA	NA	NA	29257
45922	raw_singletons_barcode64	4.00E+89	d0fd1876-8829-52d4-953e-cc20901af937	98.408	314	4	1	1	314	346	658	1.04E-158	553	315	658	seq748	Polychaeta	Phyllodocida	Phyllodocidae	Eumida	Eumida mackiei	NA	NA	NA	NA	45922
29258	raw_singletons_barcode57	4.00E+60	bf784f49-2980-421a-9b22-5acd34ae892d	98.208	279	5	0	36	314	380	658	2.98E-139	488	315	658	seq750	Polychaeta	Phyllodocida	Phyllodocidae	Eumida	Eumida mackiei	NA	NA	NA	NA	29258
45923	raw_singletons_barcode64	4.00E+89	d0fd1876-8829-52d4-953e-cc20901af937	98.089	314	5	1	1	314	345	657	1.75E-156	545	315	657	seq752	Polychaeta	Phyllodocida	Phyllodocidae	Eumida	Eumida mackiei	NA	NA	NA	NA	45923
42019	raw_singletons_barcode62	4.00E+87	11c05878-d660-44d8-812f-966799bdea79	100	313	0	0	1	313	346	658	1.72E-166	579	314	658	seq844	Malacostraca	Mysida	Mysidae	Gastrosaccus	Gastrosaccus spinifer	NA	NA	NA	NA	42019
42012	raw_singletons_barcode62	4.00E+87	5ddf08bc-0e3b-4ff4-8a90-7f80192a22c2	99.681	313	0	1	1	312	346	658	2.86E-164	571	313	658	seq844	Malacostraca	Mysida	Mysidae	Gastrosaccus	Gastrosaccus spinifer	NA	NA	NA	NA	42012
42020	raw_singletons_barcode62	4.00E+87	11c05878-d660-44d8-812f-966799bdea79	99.676	309	1	0	1	309	345	653	1.34E-162	566	314	653	seq841	Malacostraca	Mysida	Mysidae	Gastrosaccus	Gastrosaccus spinifer	NA	NA	NA	NA	42020
45835	raw_singletons_barcode64	4.00E+89	446ae852-57a4-46fa-b226-28edb89644d6	99.365	315	0	2	1	315	346	658	1.04E-163	569	316	658	seq844	Malacostraca	Mysida	Mysidae	Gastrosaccus	Gastrosaccus spinifer	NA	NA	NA	NA	45835
6789	raw_singletons_barcode50	4.00E+83	49d0688c-09cc-455e-8234-9897b4dea2f1	99.363	314	1	1	1	314	346	658	3.73E-163	568	315	658	seq844	Malacostraca	Mysida	Mysidae	Gastrosaccus	Gastrosaccus spinifer	NA	NA	NA	NA	6789
42013	raw_singletons_barcode62	4.00E+87	5ddf08bc-0e3b-4ff4-8a90-7f80192a22c2	99.353	309	1	1	1	308	345	653	2.23E-160	558	313	653	seq841	Malacostraca	Mysida	Mysidae	Gastrosaccus	Gastrosaccus spinifer	NA	NA	NA	NA	42013
45827	raw_singletons_barcode64	4.00E+89	30fd216e-07b0-4417-bf8c-740137d1b2b4	99.048	315	1	1	1	315	346	658	4.84E-162	564	316	658	seq844	Malacostraca	Mysida	Mysidae	Gastrosaccus	Gastrosaccus spinifer	NA	NA	NA	NA	45827
45842	raw_singletons_barcode64	4.00E+89	e53db749-7269-4335-886a-7da3e323b7d7	99.045	314	2	1	1	314	346	658	1.73E-161	562	315	658	seq844	Malacostraca	Mysida	Mysidae	Gastrosaccus	Gastrosaccus spinifer	NA	NA	NA	NA	45842
45836	raw_singletons_barcode64	4.00E+89	446ae852-57a4-46fa-b226-28edb89644d6	99.035	311	1	2	1	311	345	653	8.09E-160	556	316	653	seq841	Malacostraca	Mysida	Mysidae	Gastrosaccus	Gastrosaccus spinifer	NA	NA	NA	NA	45836
6790	raw_singletons_barcode50	4.00E+83	49d0688c-09cc-455e-8234-9897b4dea2f1	99.032	310	2	1	1	310	345	653	2.90E-159	555	315	653	seq841	Malacostraca	Mysida	Mysidae	Gastrosaccus	Gastrosaccus spinifer	NA	NA	NA	NA	6790
45828	raw_singletons_barcode64	4.00E+89	30fd216e-07b0-4417-bf8c-740137d1b2b4	98.714	311	2	1	1	311	345	653	3.76E-158	551	316	653	seq841	Malacostraca	Mysida	Mysidae	Gastrosaccus	Gastrosaccus spinifer	NA	NA	NA	NA	45828
45843	raw_singletons_barcode64	4.00E+89	e53db749-7269-4335-886a-7da3e323b7d7	98.71	310	3	1	1	310	345	653	1.35E-157	549	315	653	seq841	Malacostraca	Mysida	Mysidae	Gastrosaccus	Gastrosaccus spinifer	NA	NA	NA	NA	45843
12342	raw_singletons_barcode51	4.00E+99	18ae7a83-0ba5-4031-a8b5-6eb4a7f081d3	98.54	274	2	2	1	273	346	618	1.36E-137	483	309	658	seq842	Malacostraca	Mysida	Mysidae	Gastrosaccus	Gastrosaccus spinifer	NA	NA	NA	NA	12342
42021	raw_singletons_barcode62	4.00E+87	11c05878-d660-44d8-812f-966799bdea79	98.083	313	6	0	1	313	346	658	1.74E-156	545	314	658	seq842	Malacostraca	Mysida	Mysidae	Gastrosaccus	Gastrosaccus spinifer	NA	NA	NA	NA	42021
1339	raw_singletons_barcode49	4.00E+97	d7f66aa5-6259-4ef7-9cd1-2712e96a9ab7	98.239	284	3	2	32	315	377	658	1.79E-141	496	316	658	seq1063	Polychaeta	Terebellida	Pectinariidae	Lagis	Lagis koreni	NA	NA	NA	NA	1339
6862	raw_singletons_barcode50	4.00E+83	a363af56-923a-5f0a-bbb1-93490b6445d3	99.681	313	1	0	1	313	346	658	7.98E-165	573	314	658	seq1066	Polychaeta	Terebellida	Terebellidae	Lanice	Lanice conchilega	NA	NA	NA	NA	6862
6863	raw_singletons_barcode50	4.00E+83	a363af56-923a-5f0a-bbb1-93490b6445d3	99.681	313	1	0	1	313	346	658	7.98E-165	573	314	658	seq1065	Polychaeta	Terebellida	Terebellidae	Lanice	Lanice conchilega	NA	NA	NA	NA	6863
6868	raw_singletons_barcode50	4.00E+83	a363af56-923a-5f0a-bbb1-93490b6445d3	99.618	262	1	0	1	262	346	607	1.79E-136	479	314	607	seq1067	Polychaeta	Terebellida	Terebellidae	Lanice	Lanice conchilega	NA	NA	NA	NA	6868
6864	raw_singletons_barcode50	4.00E+83	a363af56-923a-5f0a-bbb1-93490b6445d3	99.361	313	2	0	1	313	346	658	3.71E-163	568	314	658	seq1071	Polychaeta	Terebellida	Terebellidae	Lanice	Lanice conchilega	NA	NA	NA	NA	6864
6865	raw_singletons_barcode50	4.00E+83	a363af56-923a-5f0a-bbb1-93490b6445d3	99.361	313	2	0	1	313	346	658	3.71E-163	568	314	658	seq1070	Polychaeta	Terebellida	Terebellidae	Lanice	Lanice conchilega	NA	NA	NA	NA	6865
6866	raw_singletons_barcode50	4.00E+83	a363af56-923a-5f0a-bbb1-93490b6445d3	99.361	313	2	0	1	313	346	658	3.71E-163	568	314	658	seq1068	Polychaeta	Terebellida	Terebellidae	Lanice	Lanice conchilega	NA	NA	NA	NA	6866
11718	raw_singletons_barcode51	4.00E+99	09ab6e41-4685-4a3c-ac0a-440d8acde343	99.234	261	2	0	1	261	346	606	2.99E-134	472	314	607	seq1067	Polychaeta	Terebellida	Terebellidae	Lanice	Lanice conchilega	NA	NA	NA	NA	11718
6851	raw_singletons_barcode50	4.00E+83	fa96388b-3df9-42f3-943b-95cdf5d782f7	99.225	258	2	0	1	258	346	603	1.37E-132	466	310	607	seq1067	Polychaeta	Terebellida	Terebellidae	Lanice	Lanice conchilega	NA	NA	NA	NA	6851
18006	raw_singletons_barcode55	4.00E+97	0d04ae75-b4df-4c63-84f6-d8831f5243bb	98.722	313	4	0	1	313	346	658	8.04E-160	556	314	658	seq1071	Polychaeta	Terebellida	Terebellidae	Lanice	Lanice conchilega	NA	NA	NA	NA	18006
18007	raw_singletons_barcode55	4.00E+97	0d04ae75-b4df-4c63-84f6-d8831f5243bb	98.722	313	4	0	1	313	346	658	8.04E-160	556	314	658	seq1068	Polychaeta	Terebellida	Terebellidae	Lanice	Lanice conchilega	NA	NA	NA	NA	18007
36130	raw_singletons_barcode59	4.00E+98	6c64aa7c-3845-43fd-85bb-57ba12e90bb4	98.423	317	1	2	1	317	346	658	2.93E-159	555	318	658	seq1071	Polychaeta	Terebellida	Terebellidae	Lanice	Lanice conchilega	NA	NA	NA	NA	36130
36131	raw_singletons_barcode59	4.00E+98	6c64aa7c-3845-43fd-85bb-57ba12e90bb4	98.423	317	1	2	1	317	346	658	2.93E-159	555	318	658	seq1068	Polychaeta	Terebellida	Terebellidae	Lanice	Lanice conchilega	NA	NA	NA	NA	36131
18008	raw_singletons_barcode55	4.00E+97	0d04ae75-b4df-4c63-84f6-d8831f5243bb	98.403	313	5	0	1	313	346	658	3.74E-158	551	314	658	seq1066	Polychaeta	Terebellida	Terebellidae	Lanice	Lanice conchilega	NA	NA	NA	NA	18008
18009	raw_singletons_barcode55	4.00E+97	0d04ae75-b4df-4c63-84f6-d8831f5243bb	98.403	313	5	0	1	313	346	658	3.74E-158	551	314	658	seq1065	Polychaeta	Terebellida	Terebellidae	Lanice	Lanice conchilega	NA	NA	NA	NA	18009
43965	raw_singletons_barcode63	4.04E+92	0ab39c1b-e14d-4563-a44f-2e9e91b81dc8	98.377	308	2	3	3	308	348	654	2.90E-154	538	313	658	seq1071	Polychaeta	Terebellida	Terebellidae	Lanice	Lanice conchilega	NA	NA	NA	NA	43965
43966	raw_singletons_barcode63	4.04E+92	0ab39c1b-e14d-4563-a44f-2e9e91b81dc8	98.377	308	2	3	3	308	348	654	2.90E-154	538	313	658	seq1068	Polychaeta	Terebellida	Terebellidae	Lanice	Lanice conchilega	NA	NA	NA	NA	43966
36132	raw_singletons_barcode59	4.00E+98	6c64aa7c-3845-43fd-85bb-57ba12e90bb4	98.107	317	2	2	1	317	346	658	1.36E-157	549	318	658	seq1066	Polychaeta	Terebellida	Terebellidae	Lanice	Lanice conchilega	NA	NA	NA	NA	36132
36133	raw_singletons_barcode59	4.00E+98	6c64aa7c-3845-43fd-85bb-57ba12e90bb4	98.107	317	2	2	1	317	346	658	1.36E-157	549	318	658	seq1065	Polychaeta	Terebellida	Terebellidae	Lanice	Lanice conchilega	NA	NA	NA	NA	36133
18012	raw_singletons_barcode55	4.00E+97	0d04ae75-b4df-4c63-84f6-d8831f5243bb	98.092	262	5	0	1	262	346	607	8.39E-130	457	314	607	seq1067	Polychaeta	Terebellida	Terebellidae	Lanice	Lanice conchilega	NA	NA	NA	NA	18012
6831	raw_singletons_barcode50	4.00E+83	66a6510f-4c8e-4e6a-9889-94a5dd557ca5	98.083	313	6	0	1	313	346	658	1.74E-156	545	314	658	seq1066	Polychaeta	Terebellida	Terebellidae	Lanice	Lanice conchilega	NA	NA	NA	NA	6831
6832	raw_singletons_barcode50	4.00E+83	66a6510f-4c8e-4e6a-9889-94a5dd557ca5	98.083	313	6	0	1	313	346	658	1.74E-156	545	314	658	seq1065	Polychaeta	Terebellida	Terebellidae	Lanice	Lanice conchilega	NA	NA	NA	NA	6832
6867	raw_singletons_barcode50	4.00E+83	a363af56-923a-5f0a-bbb1-93490b6445d3	98.083	313	6	0	1	313	346	658	1.74E-156	545	314	658	seq1069	Polychaeta	Terebellida	Terebellidae	Lanice	Lanice conchilega	NA	NA	NA	NA	6867
18010	raw_singletons_barcode55	4.00E+97	0d04ae75-b4df-4c63-84f6-d8831f5243bb	98.083	313	6	0	1	313	346	658	1.74E-156	545	314	658	seq1070	Polychaeta	Terebellida	Terebellidae	Lanice	Lanice conchilega	NA	NA	NA	NA	18010
43967	raw_singletons_barcode63	4.04E+92	0ab39c1b-e14d-4563-a44f-2e9e91b81dc8	98.052	308	3	3	3	308	348	654	1.35E-152	532	313	658	seq1066	Polychaeta	Terebellida	Terebellidae	Lanice	Lanice conchilega	NA	NA	NA	NA	43967
43968	raw_singletons_barcode63	4.04E+92	0ab39c1b-e14d-4563-a44f-2e9e91b81dc8	98.052	308	3	3	3	308	348	654	1.35E-152	532	313	658	seq1065	Polychaeta	Terebellida	Terebellidae	Lanice	Lanice conchilega	NA	NA	NA	NA	43968
11426	raw_singletons_barcode51	4.00E+99	b1e6722a-935e-49fa-a6da-12f77f37da5d	98.008	251	2	2	63	312	410	658	1.41E-122	433	313	658	seq1071	Polychaeta	Terebellida	Terebellidae	Lanice	Lanice conchilega	NA	NA	NA	NA	11426
11427	raw_singletons_barcode51	4.00E+99	b1e6722a-935e-49fa-a6da-12f77f37da5d	98.008	251	2	2	63	312	410	658	1.41E-122	433	313	658	seq1070	Polychaeta	Terebellida	Terebellidae	Lanice	Lanice conchilega	NA	NA	NA	NA	11427
11428	raw_singletons_barcode51	4.00E+99	b1e6722a-935e-49fa-a6da-12f77f37da5d	98.008	251	2	2	63	312	410	658	1.41E-122	433	313	658	seq1068	Polychaeta	Terebellida	Terebellidae	Lanice	Lanice conchilega	NA	NA	NA	NA	11428
11429	raw_singletons_barcode51	4.00E+99	b1e6722a-935e-49fa-a6da-12f77f37da5d	98.008	251	2	2	63	312	410	658	1.41E-122	433	313	658	seq1065	Polychaeta	Terebellida	Terebellidae	Lanice	Lanice conchilega	NA	NA	NA	NA	11429
41970	raw_singletons_barcode62	4.00E+87	d30eac28-b205-43b2-b12a-0e7cc1f2c45e	100	241	0	0	1	241	343	583	1.73E-126	446	300	655	seq1104	Bivalvia	Cardiida	Tellinidae	Limecola	Limecola balthica	NA	NA	NA	NA	41970
41971	raw_singletons_barcode62	4.00E+87	d30eac28-b205-43b2-b12a-0e7cc1f2c45e	98.755	241	3	0	1	241	343	583	1.74E-121	429	300	655	seq1106	Bivalvia	Cardiida	Tellinidae	Limecola	Limecola balthica	NA	NA	NA	NA	41971
41972	raw_singletons_barcode62	4.00E+87	d30eac28-b205-43b2-b12a-0e7cc1f2c45e	98.755	241	3	0	1	241	343	583	1.74E-121	429	300	655	seq1105	Bivalvia	Cardiida	Tellinidae	Limecola	Limecola balthica	NA	NA	NA	NA	41972
31828	raw_singletons_barcode58	4.00E+94	8e82c8c7-1171-4c85-ad65-04b768171a5d	98.381	247	2	2	70	314	409	655	1.42E-122	433	315	655	seq1104	Bivalvia	Cardiida	Tellinidae	Limecola	Limecola balthica	NA	NA	NA	NA	31828
5368	raw_singletons_barcode50	4.00E+83	37f39114-77f8-47a4-a058-d05ea23f9a97	100	313	0	0	1	313	346	658	1.72E-166	579	314	658	seq1107	Malacostraca	Decapoda	Polybiidae	Liocarcinus	Liocarcinus depurator	NA	NA	NA	NA	5368
5369	raw_singletons_barcode50	4.00E+83	37f39114-77f8-47a4-a058-d05ea23f9a97	99.682	314	1	0	1	314	354	667	2.22E-165	575	314	676	seq1112	Malacostraca	Decapoda	Polybiidae	Liocarcinus	Liocarcinus depurator	NA	NA	NA	NA	5369
5370	raw_singletons_barcode50	4.00E+83	37f39114-77f8-47a4-a058-d05ea23f9a97	99.681	313	1	0	1	313	346	658	7.98E-165	573	314	658	seq1115	Malacostraca	Decapoda	Polybiidae	Liocarcinus	Liocarcinus depurator	NA	NA	NA	NA	5370
5371	raw_singletons_barcode50	4.00E+83	37f39114-77f8-47a4-a058-d05ea23f9a97	99.681	313	1	0	1	313	346	658	7.98E-165	573	314	658	seq1109	Malacostraca	Decapoda	Polybiidae	Liocarcinus	Liocarcinus depurator	NA	NA	NA	NA	5371
5372	raw_singletons_barcode50	4.00E+83	37f39114-77f8-47a4-a058-d05ea23f9a97	99.681	313	1	0	1	313	346	658	7.98E-165	573	314	658	seq1108	Malacostraca	Decapoda	Polybiidae	Liocarcinus	Liocarcinus depurator	NA	NA	NA	NA	5372
5373	raw_singletons_barcode50	4.00E+83	37f39114-77f8-47a4-a058-d05ea23f9a97	99.361	313	2	0	1	313	346	658	1.03E-163	569	314	658	seq1110	Malacostraca	Decapoda	Polybiidae	Liocarcinus	Liocarcinus depurator	NA	NA	NA	NA	5373
5374	raw_singletons_barcode50	4.00E+83	37f39114-77f8-47a4-a058-d05ea23f9a97	99.361	313	2	0	1	313	346	658	3.71E-163	568	314	658	seq1120	Malacostraca	Decapoda	Polybiidae	Liocarcinus	Liocarcinus depurator	NA	NA	NA	NA	5374
5375	raw_singletons_barcode50	4.00E+83	37f39114-77f8-47a4-a058-d05ea23f9a97	99.361	313	2	0	1	313	346	658	3.71E-163	568	314	658	seq1119	Malacostraca	Decapoda	Polybiidae	Liocarcinus	Liocarcinus depurator	NA	NA	NA	NA	5375
5376	raw_singletons_barcode50	4.00E+83	37f39114-77f8-47a4-a058-d05ea23f9a97	99.361	313	2	0	1	313	346	658	3.71E-163	568	314	658	seq1118	Malacostraca	Decapoda	Polybiidae	Liocarcinus	Liocarcinus depurator	NA	NA	NA	NA	5376
5377	raw_singletons_barcode50	4.00E+83	37f39114-77f8-47a4-a058-d05ea23f9a97	99.361	313	2	0	1	313	346	658	3.71E-163	568	314	658	seq1117	Malacostraca	Decapoda	Polybiidae	Liocarcinus	Liocarcinus depurator	NA	NA	NA	NA	5377
5378	raw_singletons_barcode50	4.00E+83	37f39114-77f8-47a4-a058-d05ea23f9a97	99.361	313	2	0	1	313	346	658	3.71E-163	568	314	658	seq1116	Malacostraca	Decapoda	Polybiidae	Liocarcinus	Liocarcinus depurator	NA	NA	NA	NA	5378
5381	raw_singletons_barcode50	4.00E+83	37f39114-77f8-47a4-a058-d05ea23f9a97	99.296	284	2	0	1	284	342	625	4.91E-147	514	314	625	seq1114	Malacostraca	Decapoda	Polybiidae	Liocarcinus	Liocarcinus depurator	NA	NA	NA	NA	5381
5379	raw_singletons_barcode50	4.00E+83	37f39114-77f8-47a4-a058-d05ea23f9a97	99.042	313	3	0	1	313	346	658	1.73E-161	562	314	658	seq1111	Malacostraca	Decapoda	Polybiidae	Liocarcinus	Liocarcinus depurator	NA	NA	NA	NA	5379
5380	raw_singletons_barcode50	4.00E+83	37f39114-77f8-47a4-a058-d05ea23f9a97	98.722	313	4	0	1	313	346	658	8.04E-160	556	314	658	seq1113	Malacostraca	Decapoda	Polybiidae	Liocarcinus	Liocarcinus depurator	NA	NA	NA	NA	5380
7386	raw_singletons_barcode50	4.00E+83	4b52a319-4864-488d-823f-fc30eda3876d	100	311	0	0	1	311	348	658	2.20E-165	575	312	658	seq1145	Polychaeta	Terebellida	Terebellidae	Loimia	Loimia ramzega	NA	NA	NA	NA	7386
7387	raw_singletons_barcode50	4.00E+83	4b52a319-4864-488d-823f-fc30eda3876d	100	311	0	0	1	311	347	657	2.20E-165	575	312	657	seq1072	Polychaeta	Terebellida	Terebellidae	Loimia	Loimia ramzega	NA	NA	NA	NA	7387
46160	raw_singletons_barcode64	4.00E+89	a109fdc0-9599-5251-9da9-27e3916bac80	99.678	311	1	0	1	311	348	658	1.03E-163	569	312	658	seq1145	Polychaeta	Terebellida	Terebellidae	Loimia	Loimia ramzega	NA	NA	NA	NA	46160
46161	raw_singletons_barcode64	4.00E+89	a109fdc0-9599-5251-9da9-27e3916bac80	99.678	311	1	0	1	311	347	657	1.03E-163	569	312	657	seq1072	Polychaeta	Terebellida	Terebellidae	Loimia	Loimia ramzega	NA	NA	NA	NA	46161
14514	raw_singletons_barcode54	4.00E+85	2b09c0ff-d162-4fca-bca7-fa4de5413db3	98.101	316	3	2	1	316	346	658	4.89E-157	547	317	658	seq1204	Polychaeta	Spionida	Magelonidae	Magelona	Magelona johnstoni	NA	NA	NA	NA	14514
14515	raw_singletons_barcode54	4.00E+85	2b09c0ff-d162-4fca-bca7-fa4de5413db3	98.101	316	3	2	1	316	346	658	4.89E-157	547	317	658	seq1203	Polychaeta	Spionida	Magelonidae	Magelona	Magelona johnstoni	NA	NA	NA	NA	14515
14516	raw_singletons_barcode54	4.00E+85	2b09c0ff-d162-4fca-bca7-fa4de5413db3	98.101	316	3	2	1	316	346	658	4.89E-157	547	317	658	seq1202	Polychaeta	Spionida	Magelonidae	Magelona	Magelona johnstoni	NA	NA	NA	NA	14516
14517	raw_singletons_barcode54	4.00E+85	2b09c0ff-d162-4fca-bca7-fa4de5413db3	98.101	316	3	2	1	316	346	658	4.89E-157	547	317	658	seq1201	Polychaeta	Spionida	Magelonidae	Magelona	Magelona johnstoni	NA	NA	NA	NA	14517
14518	raw_singletons_barcode54	4.00E+85	2b09c0ff-d162-4fca-bca7-fa4de5413db3	98.101	316	3	2	1	316	346	658	4.89E-157	547	317	658	seq1200	Polychaeta	Spionida	Magelonidae	Magelona	Magelona johnstoni	NA	NA	NA	NA	14518
14519	raw_singletons_barcode54	4.00E+85	2b09c0ff-d162-4fca-bca7-fa4de5413db3	98.101	316	3	2	1	316	346	658	4.89E-157	547	317	658	seq1199	Polychaeta	Spionida	Magelonidae	Magelona	Magelona johnstoni	NA	NA	NA	NA	14519
29658	raw_singletons_barcode57	4.00E+60	35d4e2d8-e8bd-44e0-927f-537ff21343e1	98.089	314	3	2	1	312	345	657	6.24E-156	544	313	657	seq1198	Polychaeta	Spionida	Magelonidae	Magelona	Magelona johnstoni	NA	NA	NA	NA	29658
41487	raw_singletons_barcode61	4.00E+95	d107a3c8-d261-42be-9855-87a731116ef0	98.083	313	5	1	1	313	346	657	6.26E-156	544	314	657	seq1198	Polychaeta	Spionida	Magelonidae	Magelona	Magelona johnstoni	NA	NA	NA	NA	41487
42438	raw_singletons_barcode62	4.00E+87	54df6cdd-2467-43df-855d-04ca1d1faf93	98.083	313	5	1	1	312	346	658	6.24E-156	544	313	658	seq1204	Polychaeta	Spionida	Magelonidae	Magelona	Magelona johnstoni	NA	NA	NA	NA	42438
42439	raw_singletons_barcode62	4.00E+87	54df6cdd-2467-43df-855d-04ca1d1faf93	98.083	313	5	1	1	312	346	658	6.24E-156	544	313	658	seq1203	Polychaeta	Spionida	Magelonidae	Magelona	Magelona johnstoni	NA	NA	NA	NA	42439
42440	raw_singletons_barcode62	4.00E+87	54df6cdd-2467-43df-855d-04ca1d1faf93	98.083	313	5	1	1	312	346	658	6.24E-156	544	313	658	seq1202	Polychaeta	Spionida	Magelonidae	Magelona	Magelona johnstoni	NA	NA	NA	NA	42440
42441	raw_singletons_barcode62	4.00E+87	54df6cdd-2467-43df-855d-04ca1d1faf93	98.083	313	5	1	1	312	346	658	6.24E-156	544	313	658	seq1201	Polychaeta	Spionida	Magelonidae	Magelona	Magelona johnstoni	NA	NA	NA	NA	42441
42442	raw_singletons_barcode62	4.00E+87	54df6cdd-2467-43df-855d-04ca1d1faf93	98.083	313	5	1	1	312	346	658	6.24E-156	544	313	658	seq1200	Polychaeta	Spionida	Magelonidae	Magelona	Magelona johnstoni	NA	NA	NA	NA	42442
42443	raw_singletons_barcode62	4.00E+87	54df6cdd-2467-43df-855d-04ca1d1faf93	98.083	313	5	1	1	312	346	658	6.24E-156	544	313	658	seq1199	Polychaeta	Spionida	Magelonidae	Magelona	Magelona johnstoni	NA	NA	NA	NA	42443
42433	raw_singletons_barcode62	4.00E+87	54df6cdd-2467-43df-855d-04ca1d1faf93	99.361	313	1	1	1	312	346	658	1.33E-162	566	313	658	seq1210	Polychaeta	Spionida	Magelonidae	Magelona	Magelona mirabilis	NA	NA	NA	NA	42433
32746	raw_singletons_barcode58	4.00E+94	264d3110-b7b6-400a-93eb-90034c398310	98.653	297	4	0	17	313	362	658	6.30E-151	527	314	658	seq1210	Polychaeta	Spionida	Magelonidae	Magelona	Magelona mirabilis	NA	NA	NA	NA	32746
14510	raw_singletons_barcode54	4.00E+85	2b09c0ff-d162-4fca-bca7-fa4de5413db3	98.101	316	3	2	1	316	346	658	4.89E-157	547	317	658	seq1213	Polychaeta	Spionida	Magelonidae	Magelona	Magelona mirabilis	NA	NA	NA	NA	14510
14511	raw_singletons_barcode54	4.00E+85	2b09c0ff-d162-4fca-bca7-fa4de5413db3	98.101	316	3	2	1	316	346	658	4.89E-157	547	317	658	seq1212	Polychaeta	Spionida	Magelonidae	Magelona	Magelona mirabilis	NA	NA	NA	NA	14511
14512	raw_singletons_barcode54	4.00E+85	2b09c0ff-d162-4fca-bca7-fa4de5413db3	98.101	316	3	2	1	316	346	658	4.89E-157	547	317	658	seq1209	Polychaeta	Spionida	Magelonidae	Magelona	Magelona mirabilis	NA	NA	NA	NA	14512
14513	raw_singletons_barcode54	4.00E+85	2b09c0ff-d162-4fca-bca7-fa4de5413db3	98.101	316	3	2	1	316	346	658	4.89E-157	547	317	658	seq1206	Polychaeta	Spionida	Magelonidae	Magelona	Magelona mirabilis	NA	NA	NA	NA	14513
42434	raw_singletons_barcode62	4.00E+87	54df6cdd-2467-43df-855d-04ca1d1faf93	98.083	313	5	1	1	312	346	658	6.24E-156	544	313	658	seq1213	Polychaeta	Spionida	Magelonidae	Magelona	Magelona mirabilis	NA	NA	NA	NA	42434
42435	raw_singletons_barcode62	4.00E+87	54df6cdd-2467-43df-855d-04ca1d1faf93	98.083	313	5	1	1	312	346	658	6.24E-156	544	313	658	seq1212	Polychaeta	Spionida	Magelonidae	Magelona	Magelona mirabilis	NA	NA	NA	NA	42435
42436	raw_singletons_barcode62	4.00E+87	54df6cdd-2467-43df-855d-04ca1d1faf93	98.083	313	5	1	1	312	346	658	6.24E-156	544	313	658	seq1209	Polychaeta	Spionida	Magelonidae	Magelona	Magelona mirabilis	NA	NA	NA	NA	42436
42437	raw_singletons_barcode62	4.00E+87	54df6cdd-2467-43df-855d-04ca1d1faf93	98.083	313	5	1	1	312	346	658	6.24E-156	544	313	658	seq1206	Polychaeta	Spionida	Magelonidae	Magelona	Magelona mirabilis	NA	NA	NA	NA	42437
36077	raw_singletons_barcode59	4.00E+98	a66233f7-dbe2-4c24-84d5-3794b4889b15	99.681	313	1	0	1	313	346	658	7.98E-165	573	314	658	seq1237	Gymnolaemata	Cheilostomatida	Membraniporidae	Membranipora	Membranipora membranacea	NA	NA	NA	NA	36077
36073	raw_singletons_barcode59	4.00E+98	b4a67c82-a4b2-41e8-9c19-15572e1ee1c2	98.73	315	2	1	1	315	346	658	2.25E-160	558	316	658	seq1237	Gymnolaemata	Cheilostomatida	Membraniporidae	Membranipora	Membranipora membranacea	NA	NA	NA	NA	36073
36079	raw_singletons_barcode59	4.00E+98	a352ffb6-9e5d-44da-8b43-fe1acc17a5a6	98.175	274	1	3	44	317	389	658	2.35E-135	475	318	658	seq1237	Gymnolaemata	Cheilostomatida	Membraniporidae	Membranipora	Membranipora membranacea	NA	NA	NA	NA	36079
2869	raw_singletons_barcode49	4.00E+97	0fc60f54-95fe-4c35-8c60-2bcca5207f63	98.408	314	3	2	1	313	346	658	3.74E-158	551	314	658	seq1260	Malacostraca	Amphipoda	Microprotopidae	Microprotopus	Microprotopus maculatus	NA	NA	NA	NA	2869
2870	raw_singletons_barcode49	4.00E+97	0fc60f54-95fe-4c35-8c60-2bcca5207f63	98.408	314	3	2	1	313	346	658	3.74E-158	551	314	658	seq1258	Malacostraca	Amphipoda	Microprotopidae	Microprotopus	Microprotopus maculatus	NA	NA	NA	NA	2870
2871	raw_singletons_barcode49	4.00E+97	0fc60f54-95fe-4c35-8c60-2bcca5207f63	98.408	314	3	2	1	313	346	658	3.74E-158	551	314	658	seq1257	Malacostraca	Amphipoda	Microprotopidae	Microprotopus	Microprotopus maculatus	NA	NA	NA	NA	2871
2872	raw_singletons_barcode49	4.00E+97	0fc60f54-95fe-4c35-8c60-2bcca5207f63	98.408	314	3	2	1	313	346	658	3.74E-158	551	314	658	seq1254	Malacostraca	Amphipoda	Microprotopidae	Microprotopus	Microprotopus maculatus	NA	NA	NA	NA	2872
2857	raw_singletons_barcode49	4.00E+97	074d2501-f376-48dc-be54-61b07b0492c2	98.175	274	2	3	39	309	385	658	2.28E-135	475	310	658	seq1258	Malacostraca	Amphipoda	Microprotopidae	Microprotopus	Microprotopus maculatus	NA	NA	NA	NA	2857
2858	raw_singletons_barcode49	4.00E+97	074d2501-f376-48dc-be54-61b07b0492c2	98.175	274	2	3	39	309	385	658	2.28E-135	475	310	658	seq1257	Malacostraca	Amphipoda	Microprotopidae	Microprotopus	Microprotopus maculatus	NA	NA	NA	NA	2858
2859	raw_singletons_barcode49	4.00E+97	074d2501-f376-48dc-be54-61b07b0492c2	98.175	274	2	3	39	309	385	658	2.28E-135	475	310	658	seq1254	Malacostraca	Amphipoda	Microprotopidae	Microprotopus	Microprotopus maculatus	NA	NA	NA	NA	2859
2860	raw_singletons_barcode49	4.00E+97	074d2501-f376-48dc-be54-61b07b0492c2	98.175	274	2	3	39	309	385	658	2.28E-135	475	310	658	seq1252	Malacostraca	Amphipoda	Microprotopidae	Microprotopus	Microprotopus maculatus	NA	NA	NA	NA	2860
2873	raw_singletons_barcode49	4.00E+97	0fc60f54-95fe-4c35-8c60-2bcca5207f63	98.089	314	4	2	1	313	346	658	1.74E-156	545	314	658	seq1259	Malacostraca	Amphipoda	Microprotopidae	Microprotopus	Microprotopus maculatus	NA	NA	NA	NA	2873
2874	raw_singletons_barcode49	4.00E+97	0fc60f54-95fe-4c35-8c60-2bcca5207f63	98.089	314	4	2	1	313	346	658	1.74E-156	545	314	658	seq1255	Malacostraca	Amphipoda	Microprotopidae	Microprotopus	Microprotopus maculatus	NA	NA	NA	NA	2874
2875	raw_singletons_barcode49	4.00E+97	0fc60f54-95fe-4c35-8c60-2bcca5207f63	98.089	314	4	2	1	313	346	658	1.74E-156	545	314	658	seq1253	Malacostraca	Amphipoda	Microprotopidae	Microprotopus	Microprotopus maculatus	NA	NA	NA	NA	2875
41714	raw_singletons_barcode61	4.00E+95	dd21cccf-5b7b-4f04-b5aa-ed992f99a7ee	98.649	296	2	2	14	308	364	658	8.01E-150	523	309	658	seq1347	Polychaeta	Phyllodocida	Nephtyidae	Nephtys	Nephtys cirrosa	NA	NA	NA	NA	41714
14333	raw_singletons_barcode54	4.00E+85	a63ed694-0c12-4e53-8dcb-5386c1adc331	99.361	313	2	0	1	313	346	658	3.71E-163	568	314	658	seq1353	Polychaeta	Phyllodocida	Nephtyidae	Nephtys	Nephtys hombergii	NA	NA	NA	NA	14333
14334	raw_singletons_barcode54	4.00E+85	a63ed694-0c12-4e53-8dcb-5386c1adc331	99.357	311	2	0	1	311	342	652	4.80E-162	564	314	652	seq1352	Polychaeta	Phyllodocida	Nephtyidae	Nephtys	Nephtys hombergii	NA	NA	NA	NA	14334
14352	raw_singletons_barcode54	4.00E+85	580d8886-6788-4f38-96ae-e4115611bf72	99.045	314	2	1	1	314	346	658	1.73E-161	562	315	658	seq1353	Polychaeta	Phyllodocida	Nephtyidae	Nephtys	Nephtys hombergii	NA	NA	NA	NA	14352
14353	raw_singletons_barcode54	4.00E+85	580d8886-6788-4f38-96ae-e4115611bf72	99.038	312	2	1	1	312	342	652	2.24E-160	558	315	652	seq1352	Polychaeta	Phyllodocida	Nephtyidae	Nephtys	Nephtys hombergii	NA	NA	NA	NA	14353
41384	raw_singletons_barcode61	4.00E+95	669ab9cf-9d0a-4557-ad3a-ef573779537f	98.361	305	4	1	11	315	355	658	3.79E-153	534	316	658	seq1353	Polychaeta	Phyllodocida	Nephtyidae	Nephtys	Nephtys hombergii	NA	NA	NA	NA	41384
41385	raw_singletons_barcode61	4.00E+95	669ab9cf-9d0a-4557-ad3a-ef573779537f	98.35	303	4	1	11	313	351	652	4.90E-152	531	316	652	seq1352	Polychaeta	Phyllodocida	Nephtyidae	Nephtys	Nephtys hombergii	NA	NA	NA	NA	41385
14335	raw_singletons_barcode54	4.00E+85	a63ed694-0c12-4e53-8dcb-5386c1adc331	98.083	313	6	0	1	313	346	658	1.74E-156	545	314	658	seq1351	Polychaeta	Phyllodocida	Nephtyidae	Nephtys	Nephtys hombergii	NA	NA	NA	NA	14335
14336	raw_singletons_barcode54	4.00E+85	a63ed694-0c12-4e53-8dcb-5386c1adc331	98.083	313	6	0	1	313	346	658	1.74E-156	545	314	658	seq1350	Polychaeta	Phyllodocida	Nephtyidae	Nephtys	Nephtys hombergii	NA	NA	NA	NA	14336
1679	raw_singletons_barcode49	4.00E+97	20f442f4-a36d-4d67-aac3-8cedf59cafd3	99.013	304	1	2	5	306	1	304	6.19E-156	544	311	304	seq1362	Polychaeta		Capitellidae	Notomastus	Notomastus latericeus	NA	NA	NA	NA	1679
30563	raw_singletons_barcode57	4.00E+60	8cdeee77-cc96-42f3-934c-f0a30f300275	98.54	274	3	1	5	277	1	274	1.37E-137	483	312	304	seq1362	Polychaeta		Capitellidae	Notomastus	Notomastus latericeus	NA	NA	NA	NA	30563
41751	raw_singletons_barcode61	4.00E+95	e4449ff2-5592-4399-a1d4-208604f2341d	99.678	311	0	1	1	310	348	658	3.67E-163	568	311	658	seq1395	Polychaeta	Opheliida	Opheliidae	Ophelia	Ophelia borealis	NA	NA	NA	NA	41751
41752	raw_singletons_barcode61	4.00E+95	e4449ff2-5592-4399-a1d4-208604f2341d	99.357	311	1	1	1	310	348	658	1.71E-161	562	311	658	seq1398	Polychaeta	Opheliida	Opheliidae	Ophelia	Ophelia borealis	NA	NA	NA	NA	41752
41754	raw_singletons_barcode61	4.00E+95	e4449ff2-5592-4399-a1d4-208604f2341d	99.331	299	1	1	1	298	347	645	8.01E-155	540	311	645	seq1396	Polychaeta	Opheliida	Opheliidae	Ophelia	Ophelia borealis	NA	NA	NA	NA	41754
41753	raw_singletons_barcode61	4.00E+95	e4449ff2-5592-4399-a1d4-208604f2341d	99.035	311	2	1	1	310	348	658	7.95E-160	556	311	658	seq1397	Polychaeta	Opheliida	Opheliidae	Ophelia	Ophelia borealis	NA	NA	NA	NA	41753
24352	raw_singletons_barcode56	4.40E+95	5ff3eb87-131e-4f9f-b443-0be7a4543d6d	98.444	257	0	4	44	296	387	643	1.39E-127	449	312	645	seq1396	Polychaeta	Opheliida	Opheliidae	Ophelia	Ophelia borealis	NA	NA	NA	NA	24352
42058	raw_singletons_barcode62	4.00E+87	7c1f1998-ec0c-4eab-b73d-443fee9183e9	98.444	257	4	0	57	313	402	658	1.08E-128	453	314	658	seq1395	Polychaeta	Opheliida	Opheliidae	Ophelia	Ophelia borealis	NA	NA	NA	NA	42058
35031	raw_singletons_barcode58	4.00E+94	704d7d0f-8542-41ae-9c5c-a40e8c080431	98.381	247	4	0	1	247	348	594	3.88E-123	435	310	658	seq1395	Polychaeta	Opheliida	Opheliidae	Ophelia	Ophelia borealis	NA	NA	NA	NA	35031
42061	raw_singletons_barcode62	4.00E+87	7c1f1998-ec0c-4eab-b73d-443fee9183e9	98.367	245	4	0	57	301	401	645	5.08E-122	431	314	645	seq1396	Polychaeta	Opheliida	Opheliidae	Ophelia	Ophelia borealis	NA	NA	NA	NA	42061
24349	raw_singletons_barcode56	4.40E+95	5ff3eb87-131e-4f9f-b443-0be7a4543d6d	98.155	271	2	3	44	311	388	658	1.07E-133	470	312	658	seq1395	Polychaeta	Opheliida	Opheliidae	Ophelia	Ophelia borealis	NA	NA	NA	NA	24349
42059	raw_singletons_barcode62	4.00E+87	7c1f1998-ec0c-4eab-b73d-443fee9183e9	98.054	257	5	0	57	313	402	658	5.05E-127	448	314	658	seq1398	Polychaeta	Opheliida	Opheliidae	Ophelia	Ophelia borealis	NA	NA	NA	NA	42059
42060	raw_singletons_barcode62	4.00E+87	7c1f1998-ec0c-4eab-b73d-443fee9183e9	98.054	257	5	0	57	313	402	658	5.05E-127	448	314	658	seq1397	Polychaeta	Opheliida	Opheliidae	Ophelia	Ophelia borealis	NA	NA	NA	NA	42060
44494	raw_singletons_barcode63	4.04E+92	7327ca67-7069-463a-8c08-399f3358142c	98.054	257	5	0	56	312	402	658	5.03E-127	448	313	658	seq1395	Polychaeta	Opheliida	Opheliidae	Ophelia	Ophelia borealis	NA	NA	NA	NA	44494
45951	raw_singletons_barcode64	4.00E+89	5bf3e939-683c-4725-bb6c-1858257738df	99.363	314	2	0	1	314	183	496	1.03E-163	569	314	601	seq1434	Ophiuroidea	Amphilepidida	Ophiotrichidae	Ophiothrix	Ophiothrix fragilis	NA	NA	NA	NA	45951
45952	raw_singletons_barcode64	4.00E+89	5bf3e939-683c-4725-bb6c-1858257738df	99.361	313	2	0	1	313	346	658	3.71E-163	568	314	658	seq1433	Ophiuroidea	Amphilepidida	Ophiotrichidae	Ophiothrix	Ophiothrix fragilis	NA	NA	NA	NA	45952
45953	raw_singletons_barcode64	4.00E+89	5bf3e939-683c-4725-bb6c-1858257738df	99.361	313	2	0	1	313	346	658	3.71E-163	568	314	658	seq1432	Ophiuroidea	Amphilepidida	Ophiotrichidae	Ophiothrix	Ophiothrix fragilis	NA	NA	NA	NA	45953
45954	raw_singletons_barcode64	4.00E+89	5bf3e939-683c-4725-bb6c-1858257738df	99.361	313	2	0	1	313	346	658	3.71E-163	568	314	658	seq1431	Ophiuroidea	Amphilepidida	Ophiotrichidae	Ophiothrix	Ophiothrix fragilis	NA	NA	NA	NA	45954
45955	raw_singletons_barcode64	4.00E+89	5bf3e939-683c-4725-bb6c-1858257738df	99.361	313	2	0	1	313	346	658	3.71E-163	568	314	658	seq1429	Ophiuroidea	Amphilepidida	Ophiotrichidae	Ophiothrix	Ophiothrix fragilis	NA	NA	NA	NA	45955
45956	raw_singletons_barcode64	4.00E+89	5bf3e939-683c-4725-bb6c-1858257738df	99.361	313	2	0	1	313	346	658	3.71E-163	568	314	658	seq1427	Ophiuroidea	Amphilepidida	Ophiotrichidae	Ophiothrix	Ophiothrix fragilis	NA	NA	NA	NA	45956
45957	raw_singletons_barcode64	4.00E+89	5bf3e939-683c-4725-bb6c-1858257738df	99.359	312	2	0	2	313	347	658	1.34E-162	566	314	658	seq1430	Ophiuroidea	Amphilepidida	Ophiotrichidae	Ophiothrix	Ophiothrix fragilis	NA	NA	NA	NA	45957
45958	raw_singletons_barcode64	4.00E+89	5bf3e939-683c-4725-bb6c-1858257738df	99.045	314	3	0	1	314	178	491	4.80E-162	564	314	655	seq1436	Ophiuroidea	Amphilepidida	Ophiotrichidae	Ophiothrix	Ophiothrix fragilis	NA	NA	NA	NA	45958
45959	raw_singletons_barcode64	4.00E+89	5bf3e939-683c-4725-bb6c-1858257738df	99.045	314	3	0	1	314	178	491	4.80E-162	564	314	655	seq1435	Ophiuroidea	Amphilepidida	Ophiotrichidae	Ophiothrix	Ophiothrix fragilis	NA	NA	NA	NA	45959
45960	raw_singletons_barcode64	4.00E+89	5bf3e939-683c-4725-bb6c-1858257738df	99.042	313	3	0	1	313	346	658	1.73E-161	562	314	658	seq1426	Ophiuroidea	Amphilepidida	Ophiotrichidae	Ophiothrix	Ophiothrix fragilis	NA	NA	NA	NA	45960
45961	raw_singletons_barcode64	4.00E+89	5bf3e939-683c-4725-bb6c-1858257738df	99.042	313	3	0	1	313	346	658	1.73E-161	562	314	658	seq1425	Ophiuroidea	Amphilepidida	Ophiotrichidae	Ophiothrix	Ophiothrix fragilis	NA	NA	NA	NA	45961
45962	raw_singletons_barcode64	4.00E+89	5bf3e939-683c-4725-bb6c-1858257738df	98.722	313	4	0	1	313	346	658	8.04E-160	556	314	658	seq1424	Ophiuroidea	Amphilepidida	Ophiotrichidae	Ophiothrix	Ophiothrix fragilis	NA	NA	NA	NA	45962
45963	raw_singletons_barcode64	4.00E+89	5bf3e939-683c-4725-bb6c-1858257738df	98.722	313	4	0	1	313	346	658	8.04E-160	556	314	658	seq1423	Ophiuroidea	Amphilepidida	Ophiotrichidae	Ophiothrix	Ophiothrix fragilis	NA	NA	NA	NA	45963
45964	raw_singletons_barcode64	4.00E+89	5bf3e939-683c-4725-bb6c-1858257738df	98.403	313	5	0	1	313	346	658	3.74E-158	551	314	658	seq1428	Ophiuroidea	Amphilepidida	Ophiotrichidae	Ophiothrix	Ophiothrix fragilis	NA	NA	NA	NA	45964
45965	raw_singletons_barcode64	4.00E+89	5bf3e939-683c-4725-bb6c-1858257738df	98.403	313	5	0	1	313	346	658	3.74E-158	551	314	658	seq1422	Ophiuroidea	Amphilepidida	Ophiotrichidae	Ophiothrix	Ophiothrix fragilis	NA	NA	NA	NA	45965
33018	raw_singletons_barcode58	4.00E+94	399eeed6-ae2c-46d4-9b75-99c60716b0ce	99.197	249	2	0	1	249	346	594	1.41E-127	449	315	658	seq1447	Ophiuroidea	Ophiurida	Ophiuridae	Ophiura	Ophiura albida	NA	NA	NA	NA	33018
33019	raw_singletons_barcode58	4.00E+94	399eeed6-ae2c-46d4-9b75-99c60716b0ce	99.197	249	2	0	1	249	346	594	1.41E-127	449	315	658	seq1441	Ophiuroidea	Ophiurida	Ophiuridae	Ophiura	Ophiura albida	NA	NA	NA	NA	33019
33020	raw_singletons_barcode58	4.00E+94	399eeed6-ae2c-46d4-9b75-99c60716b0ce	99.197	249	2	0	1	249	346	594	1.41E-127	449	315	658	seq1440	Ophiuroidea	Ophiurida	Ophiuridae	Ophiura	Ophiura albida	NA	NA	NA	NA	33020
33021	raw_singletons_barcode58	4.00E+94	399eeed6-ae2c-46d4-9b75-99c60716b0ce	99.197	249	2	0	1	249	346	594	1.41E-127	449	315	658	seq1439	Ophiuroidea	Ophiurida	Ophiuridae	Ophiura	Ophiura albida	NA	NA	NA	NA	33021
33022	raw_singletons_barcode58	4.00E+94	399eeed6-ae2c-46d4-9b75-99c60716b0ce	99.197	249	2	0	1	249	346	594	1.41E-127	449	315	658	seq1438	Ophiuroidea	Ophiurida	Ophiuridae	Ophiura	Ophiura albida	NA	NA	NA	NA	33022
33023	raw_singletons_barcode58	4.00E+94	399eeed6-ae2c-46d4-9b75-99c60716b0ce	98.795	249	3	0	1	249	178	426	6.55E-126	444	315	655	seq1445	Ophiuroidea	Ophiurida	Ophiuridae	Ophiura	Ophiura albida	NA	NA	NA	NA	33023
45755	raw_singletons_barcode64	4.00E+89	92895386-4a60-4cf5-8d10-0a24789e1c70	98.726	314	3	1	1	314	346	658	8.06E-160	556	315	658	seq1447	Ophiuroidea	Ophiurida	Ophiuridae	Ophiura	Ophiura albida	NA	NA	NA	NA	45755
45756	raw_singletons_barcode64	4.00E+89	92895386-4a60-4cf5-8d10-0a24789e1c70	98.726	314	3	1	1	314	346	658	8.06E-160	556	315	658	seq1441	Ophiuroidea	Ophiurida	Ophiuridae	Ophiura	Ophiura albida	NA	NA	NA	NA	45756
45757	raw_singletons_barcode64	4.00E+89	92895386-4a60-4cf5-8d10-0a24789e1c70	98.726	314	3	1	1	314	346	658	8.06E-160	556	315	658	seq1440	Ophiuroidea	Ophiurida	Ophiuridae	Ophiura	Ophiura albida	NA	NA	NA	NA	45757
45758	raw_singletons_barcode64	4.00E+89	92895386-4a60-4cf5-8d10-0a24789e1c70	98.726	314	3	1	1	314	346	658	8.06E-160	556	315	658	seq1439	Ophiuroidea	Ophiurida	Ophiuridae	Ophiura	Ophiura albida	NA	NA	NA	NA	45758
45759	raw_singletons_barcode64	4.00E+89	92895386-4a60-4cf5-8d10-0a24789e1c70	98.726	314	3	1	1	314	346	658	8.06E-160	556	315	658	seq1438	Ophiuroidea	Ophiurida	Ophiuridae	Ophiura	Ophiura albida	NA	NA	NA	NA	45759
45803	raw_singletons_barcode64	4.00E+89	15f21d1e-3945-4ab5-bf85-af9f1a08d39b	98.423	317	1	3	1	317	346	658	2.93E-159	555	318	658	seq1447	Ophiuroidea	Ophiurida	Ophiuridae	Ophiura	Ophiura albida	NA	NA	NA	NA	45803
45804	raw_singletons_barcode64	4.00E+89	15f21d1e-3945-4ab5-bf85-af9f1a08d39b	98.423	317	1	3	1	317	346	658	2.93E-159	555	318	658	seq1441	Ophiuroidea	Ophiurida	Ophiuridae	Ophiura	Ophiura albida	NA	NA	NA	NA	45804
45805	raw_singletons_barcode64	4.00E+89	15f21d1e-3945-4ab5-bf85-af9f1a08d39b	98.423	317	1	3	1	317	346	658	2.93E-159	555	318	658	seq1440	Ophiuroidea	Ophiurida	Ophiuridae	Ophiura	Ophiura albida	NA	NA	NA	NA	45805
45806	raw_singletons_barcode64	4.00E+89	15f21d1e-3945-4ab5-bf85-af9f1a08d39b	98.423	317	1	3	1	317	346	658	2.93E-159	555	318	658	seq1439	Ophiuroidea	Ophiurida	Ophiuridae	Ophiura	Ophiura albida	NA	NA	NA	NA	45806
45807	raw_singletons_barcode64	4.00E+89	15f21d1e-3945-4ab5-bf85-af9f1a08d39b	98.423	317	1	3	1	317	346	658	2.93E-159	555	318	658	seq1438	Ophiuroidea	Ophiurida	Ophiuridae	Ophiura	Ophiura albida	NA	NA	NA	NA	45807
45760	raw_singletons_barcode64	4.00E+89	92895386-4a60-4cf5-8d10-0a24789e1c70	98.413	315	4	1	1	315	178	491	1.04E-158	553	315	655	seq1445	Ophiuroidea	Ophiurida	Ophiuridae	Ophiura	Ophiura albida	NA	NA	NA	NA	45760
33024	raw_singletons_barcode58	4.00E+94	399eeed6-ae2c-46d4-9b75-99c60716b0ce	98.394	249	4	0	1	249	178	426	3.05E-124	438	315	655	seq1444	Ophiuroidea	Ophiurida	Ophiuridae	Ophiura	Ophiura albida	NA	NA	NA	NA	33024
33025	raw_singletons_barcode58	4.00E+94	399eeed6-ae2c-46d4-9b75-99c60716b0ce	98.394	249	4	0	1	249	346	594	3.05E-124	438	315	658	seq1443	Ophiuroidea	Ophiurida	Ophiuridae	Ophiura	Ophiura albida	NA	NA	NA	NA	33025
33026	raw_singletons_barcode58	4.00E+94	399eeed6-ae2c-46d4-9b75-99c60716b0ce	98.394	249	4	0	1	249	346	594	3.05E-124	438	315	658	seq1442	Ophiuroidea	Ophiurida	Ophiuridae	Ophiura	Ophiura albida	NA	NA	NA	NA	33026
45808	raw_singletons_barcode64	4.00E+89	15f21d1e-3945-4ab5-bf85-af9f1a08d39b	98.113	318	2	3	1	318	178	491	3.79E-158	551	318	655	seq1445	Ophiuroidea	Ophiurida	Ophiuridae	Ophiura	Ophiura albida	NA	NA	NA	NA	45808
45761	raw_singletons_barcode64	4.00E+89	92895386-4a60-4cf5-8d10-0a24789e1c70	98.095	315	5	1	1	315	178	491	4.85E-157	547	315	655	seq1444	Ophiuroidea	Ophiurida	Ophiuridae	Ophiura	Ophiura albida	NA	NA	NA	NA	45761
45762	raw_singletons_barcode64	4.00E+89	92895386-4a60-4cf5-8d10-0a24789e1c70	98.089	314	5	1	1	314	346	658	1.75E-156	545	315	658	seq1443	Ophiuroidea	Ophiurida	Ophiuridae	Ophiura	Ophiura albida	NA	NA	NA	NA	45762
45763	raw_singletons_barcode64	4.00E+89	92895386-4a60-4cf5-8d10-0a24789e1c70	98.089	314	5	1	1	314	346	658	1.75E-156	545	315	658	seq1442	Ophiuroidea	Ophiurida	Ophiuridae	Ophiura	Ophiura albida	NA	NA	NA	NA	45763
45787	raw_singletons_barcode64	4.00E+89	157955e5-1e6d-449a-8fb4-a3a94d1ad616	98.089	314	1	2	1	310	346	658	2.23E-155	542	311	658	seq1447	Ophiuroidea	Ophiurida	Ophiuridae	Ophiura	Ophiura albida	NA	NA	NA	NA	45787
45788	raw_singletons_barcode64	4.00E+89	157955e5-1e6d-449a-8fb4-a3a94d1ad616	98.089	314	1	2	1	310	346	658	2.23E-155	542	311	658	seq1441	Ophiuroidea	Ophiurida	Ophiuridae	Ophiura	Ophiura albida	NA	NA	NA	NA	45788
45789	raw_singletons_barcode64	4.00E+89	157955e5-1e6d-449a-8fb4-a3a94d1ad616	98.089	314	1	2	1	310	346	658	2.23E-155	542	311	658	seq1440	Ophiuroidea	Ophiurida	Ophiuridae	Ophiura	Ophiura albida	NA	NA	NA	NA	45789
45790	raw_singletons_barcode64	4.00E+89	157955e5-1e6d-449a-8fb4-a3a94d1ad616	98.089	314	1	2	1	310	346	658	2.23E-155	542	311	658	seq1439	Ophiuroidea	Ophiurida	Ophiuridae	Ophiura	Ophiura albida	NA	NA	NA	NA	45790
45791	raw_singletons_barcode64	4.00E+89	157955e5-1e6d-449a-8fb4-a3a94d1ad616	98.089	314	1	2	1	310	346	658	2.23E-155	542	311	658	seq1438	Ophiuroidea	Ophiurida	Ophiuridae	Ophiura	Ophiura albida	NA	NA	NA	NA	45791
45771	raw_singletons_barcode64	4.00E+89	6ea258ae-4b8b-4cee-ba75-67fcbc42ce47	98.071	311	1	3	1	306	348	658	1.02E-153	536	307	658	seq1447	Ophiuroidea	Ophiurida	Ophiuridae	Ophiura	Ophiura albida	NA	NA	NA	NA	45771
45772	raw_singletons_barcode64	4.00E+89	6ea258ae-4b8b-4cee-ba75-67fcbc42ce47	98.071	311	1	3	1	306	348	658	1.02E-153	536	307	658	seq1441	Ophiuroidea	Ophiurida	Ophiuridae	Ophiura	Ophiura albida	NA	NA	NA	NA	45772
45773	raw_singletons_barcode64	4.00E+89	6ea258ae-4b8b-4cee-ba75-67fcbc42ce47	98.071	311	1	3	1	306	348	658	1.02E-153	536	307	658	seq1440	Ophiuroidea	Ophiurida	Ophiuridae	Ophiura	Ophiura albida	NA	NA	NA	NA	45773
45774	raw_singletons_barcode64	4.00E+89	6ea258ae-4b8b-4cee-ba75-67fcbc42ce47	98.071	311	1	3	1	306	348	658	1.02E-153	536	307	658	seq1439	Ophiuroidea	Ophiurida	Ophiuridae	Ophiura	Ophiura albida	NA	NA	NA	NA	45774
45775	raw_singletons_barcode64	4.00E+89	6ea258ae-4b8b-4cee-ba75-67fcbc42ce47	98.071	311	1	3	1	306	348	658	1.02E-153	536	307	658	seq1438	Ophiuroidea	Ophiurida	Ophiuridae	Ophiura	Ophiura albida	NA	NA	NA	NA	45775
6014	raw_singletons_barcode50	4.00E+83	69e04ec2-517a-49d4-b01f-139f78495007	98.268	231	0	4	1	227	346	576	3.80E-113	401	300	658	seq1467	Ophiuroidea	Ophiurida	Ophiuridae	Ophiura	Ophiura ophiura	NA	NA	NA	NA	6014
6015	raw_singletons_barcode50	4.00E+83	69e04ec2-517a-49d4-b01f-139f78495007	98.268	231	0	4	1	227	346	576	3.80E-113	401	300	658	seq1463	Ophiuroidea	Ophiurida	Ophiuridae	Ophiura	Ophiura ophiura	NA	NA	NA	NA	6015
6016	raw_singletons_barcode50	4.00E+83	69e04ec2-517a-49d4-b01f-139f78495007	98.268	231	0	4	1	227	346	576	3.80E-113	401	300	658	seq1458	Ophiuroidea	Ophiurida	Ophiuridae	Ophiura	Ophiura ophiura	NA	NA	NA	NA	6016
6017	raw_singletons_barcode50	4.00E+83	69e04ec2-517a-49d4-b01f-139f78495007	98.268	231	0	4	1	227	346	576	3.80E-113	401	300	658	seq1455	Ophiuroidea	Ophiurida	Ophiuridae	Ophiura	Ophiura ophiura	NA	NA	NA	NA	6017
6018	raw_singletons_barcode50	4.00E+83	69e04ec2-517a-49d4-b01f-139f78495007	98.268	231	0	4	1	227	346	576	3.80E-113	401	300	658	seq1449	Ophiuroidea	Ophiurida	Ophiuridae	Ophiura	Ophiura ophiura	NA	NA	NA	NA	6018
6019	raw_singletons_barcode50	4.00E+83	69e04ec2-517a-49d4-b01f-139f78495007	98.268	231	0	4	1	227	343	573	3.80E-113	401	300	640	seq1448	Ophiuroidea	Ophiurida	Ophiuridae	Ophiura	Ophiura ophiura	NA	NA	NA	NA	6019
32311	raw_singletons_barcode58	4.00E+94	39cfa330-c4ec-46b1-b84c-57c150c71ca0	98.162	272	3	2	44	315	389	658	8.38E-135	473	316	658	seq1459	Ophiuroidea	Ophiurida	Ophiuridae	Ophiura	Ophiura ophiura	NA	NA	NA	NA	32311
32312	raw_singletons_barcode58	4.00E+94	39cfa330-c4ec-46b1-b84c-57c150c71ca0	98.162	272	3	2	44	315	389	658	8.38E-135	473	316	658	seq1454	Ophiuroidea	Ophiurida	Ophiuridae	Ophiura	Ophiura ophiura	NA	NA	NA	NA	32312
6020	raw_singletons_barcode50	4.00E+83	69e04ec2-517a-49d4-b01f-139f78495007	98.268	231	0	4	1	227	346	576	3.80E-113	401	300	649	seq1437	Ophiuroidea	Ophiurida	Ophiuridae	Ophiura	Ophiura sp.	NA	NA	NA	NA	6020
41504	raw_singletons_barcode61	4.00E+95	9985c2f1-e64e-4697-bfa1-5171d241d652	99.003	301	3	0	1	301	345	645	8.09E-155	540	314	645	seq1480	Polychaeta	Sabellida	Oweniidae	Owenia	Owenia fusiformis	NA	NA	NA	NA	41504
41505	raw_singletons_barcode61	4.00E+95	9985c2f1-e64e-4697-bfa1-5171d241d652	98.842	259	3	0	1	259	305	563	1.80E-131	462	314	563	seq1479	Polychaeta	Sabellida	Oweniidae	Owenia	Owenia fusiformis	NA	NA	NA	NA	41505
41503	raw_singletons_barcode61	4.00E+95	9985c2f1-e64e-4697-bfa1-5171d241d652	98.722	313	4	0	1	313	346	658	8.04E-160	556	314	658	seq1478	Polychaeta	Sabellida	Oweniidae	Owenia	Owenia fusiformis	NA	NA	NA	NA	41503
16961	raw_singletons_barcode55	4.00E+97	0bfd2462-f292-4449-8089-c96624187133	98.45	258	4	0	1	258	305	562	3.02E-129	455	314	563	seq1479	Polychaeta	Sabellida	Oweniidae	Owenia	Owenia fusiformis	NA	NA	NA	NA	16961
18458	raw_singletons_barcode55	4.00E+97	d187758d-aaf1-466e-8189-0f5c47e90df3	98.134	268	4	1	46	312	375	642	1.39E-132	466	313	642	seq1489	Malacostraca	Decapoda	Paguridae	Pagurus	Pagurus bernhardus	NA	NA	NA	NA	18458
18459	raw_singletons_barcode55	4.00E+97	d187758d-aaf1-466e-8189-0f5c47e90df3	98.134	268	4	1	46	312	391	658	1.39E-132	466	313	658	seq1488	Malacostraca	Decapoda	Paguridae	Pagurus	Pagurus bernhardus	NA	NA	NA	NA	18459
18460	raw_singletons_barcode55	4.00E+97	d187758d-aaf1-466e-8189-0f5c47e90df3	98.134	268	4	1	46	312	391	658	1.39E-132	466	313	658	seq1487	Malacostraca	Decapoda	Paguridae	Pagurus	Pagurus bernhardus	NA	NA	NA	NA	18460
42799	raw_singletons_barcode62	4.00E+87	25307401-fa79-5bfe-89a0-e24be87d9bcd	98.062	258	4	1	56	312	385	642	5.03E-127	448	313	642	seq1489	Malacostraca	Decapoda	Paguridae	Pagurus	Pagurus bernhardus	NA	NA	NA	NA	42799
42800	raw_singletons_barcode62	4.00E+87	25307401-fa79-5bfe-89a0-e24be87d9bcd	98.062	258	4	1	56	312	401	658	5.03E-127	448	313	658	seq1488	Malacostraca	Decapoda	Paguridae	Pagurus	Pagurus bernhardus	NA	NA	NA	NA	42800
42801	raw_singletons_barcode62	4.00E+87	25307401-fa79-5bfe-89a0-e24be87d9bcd	98.062	258	4	1	56	312	401	658	5.03E-127	448	313	658	seq1487	Malacostraca	Decapoda	Paguridae	Pagurus	Pagurus bernhardus	NA	NA	NA	NA	42801
44879	raw_singletons_barcode63	4.04E+92	e891a9e0-db25-4756-98ea-0474cd6267ef	99.344	305	1	1	2	305	347	651	3.73E-158	551	313	658	seq1536	Malacostraca	Amphipoda	Caprellidae	Pariambus	Pariambus typicus	NA	NA	NA	NA	44879
44880	raw_singletons_barcode63	4.04E+92	e891a9e0-db25-4756-98ea-0474cd6267ef	99.016	305	2	1	2	305	347	651	1.73E-156	545	313	658	seq1535	Malacostraca	Amphipoda	Caprellidae	Pariambus	Pariambus typicus	NA	NA	NA	NA	44880
44881	raw_singletons_barcode63	4.04E+92	e891a9e0-db25-4756-98ea-0474cd6267ef	99.016	305	2	1	2	305	347	651	1.73E-156	545	313	658	seq1534	Malacostraca	Amphipoda	Caprellidae	Pariambus	Pariambus typicus	NA	NA	NA	NA	44881
42726	raw_singletons_barcode62	4.00E+87	955d7bcb-b5bd-4ef0-b16f-b507459cc38b	98.366	306	4	1	8	312	353	658	1.04E-153	536	313	658	seq1536	Malacostraca	Amphipoda	Caprellidae	Pariambus	Pariambus typicus	NA	NA	NA	NA	42726
45854	raw_singletons_barcode64	4.00E+89	212e5119-888a-4d8e-a9f4-45943c60dee7	98.083	313	3	3	2	312	347	658	2.24E-155	542	313	658	seq1536	Malacostraca	Amphipoda	Caprellidae	Pariambus	Pariambus typicus	NA	NA	NA	NA	45854
42727	raw_singletons_barcode62	4.00E+87	955d7bcb-b5bd-4ef0-b16f-b507459cc38b	98.039	306	5	1	8	312	353	658	4.85E-152	531	313	658	seq1535	Malacostraca	Amphipoda	Caprellidae	Pariambus	Pariambus typicus	NA	NA	NA	NA	42727
42728	raw_singletons_barcode62	4.00E+87	955d7bcb-b5bd-4ef0-b16f-b507459cc38b	98.039	306	5	1	8	312	353	658	4.85E-152	531	313	658	seq1534	Malacostraca	Amphipoda	Caprellidae	Pariambus	Pariambus typicus	NA	NA	NA	NA	42728
45996	raw_singletons_barcode64	4.00E+89	3bbf5f9f-c8b3-4c8a-a7d4-3d7231dcff11	100	313	0	0	1	313	346	658	1.72E-166	579	314	658	seq1587	Polychaeta	Phyllodocida	Pholoidae	Pholoe	Pholoe baltica	NA	NA	NA	NA	45996
45997	raw_singletons_barcode64	4.00E+89	3bbf5f9f-c8b3-4c8a-a7d4-3d7231dcff11	100	309	0	0	1	309	324	632	2.87E-164	571	314	632	seq1586	Polychaeta	Phyllodocida	Pholoidae	Pholoe	Pholoe baltica	NA	NA	NA	NA	45997
1379	raw_singletons_barcode49	4.00E+97	920a6264-b154-4f37-bd36-82fa5be80556	99.643	280	1	0	33	312	379	658	1.76E-146	512	313	658	seq1587	Polychaeta	Phyllodocida	Pholoidae	Pholoe	Pholoe baltica	NA	NA	NA	NA	1379
1380	raw_singletons_barcode49	4.00E+97	920a6264-b154-4f37-bd36-82fa5be80556	99.638	276	1	0	33	308	357	632	2.94E-144	505	313	632	seq1586	Polychaeta	Phyllodocida	Pholoidae	Pholoe	Pholoe baltica	NA	NA	NA	NA	1380
11343	raw_singletons_barcode51	4.00E+99	e7571a92-d6de-4eca-a665-6de305f75fc0	98.113	265	0	3	18	278	366	629	8.10E-130	457	304	658	seq1587	Polychaeta	Phyllodocida	Pholoidae	Pholoe	Pholoe baltica	NA	NA	NA	NA	11343
11344	raw_singletons_barcode51	4.00E+99	e7571a92-d6de-4eca-a665-6de305f75fc0	98.113	265	0	3	18	278	344	607	8.10E-130	457	304	632	seq1586	Polychaeta	Phyllodocida	Pholoidae	Pholoe	Pholoe baltica	NA	NA	NA	NA	11344
15148	raw_singletons_barcode54	4.00E+85	5d76cf4d-83b0-4e85-922b-dbb4cf4deb59	98.089	314	3	3	1	312	346	658	6.24E-156	544	313	658	seq1587	Polychaeta	Phyllodocida	Pholoidae	Pholoe	Pholoe baltica	NA	NA	NA	NA	15148
15149	raw_singletons_barcode54	4.00E+85	5d76cf4d-83b0-4e85-922b-dbb4cf4deb59	98.065	310	3	3	1	308	324	632	1.04E-153	536	313	632	seq1586	Polychaeta	Phyllodocida	Pholoidae	Pholoe	Pholoe baltica	NA	NA	NA	NA	15149
12655	raw_singletons_barcode51	4.00E+99	f0935714-53da-4b6a-8042-adf3ff1104c1	98.083	313	2	1	1	309	346	658	2.22E-155	542	310	658	seq1597	Polychaeta	Phyllodocida	Phyllodocidae	Phyllodoce	Phyllodoce mucosa	NA	NA	NA	NA	12655
998	raw_singletons_barcode49	4.00E+97	8a249c01-33ee-4b59-8706-105d845bf244	100	316	0	0	1	316	343	658	3.72E-168	584	317	658	seq1601	Malacostraca	Decapoda	Pinnotheridae	Pinnotheres	Pinnotheres pisum	NA	NA	NA	NA	998
5641	raw_singletons_barcode50	4.00E+83	f8b90053-1ce0-40d5-a3f9-c11d8b5983f1	100	313	0	0	1	313	346	658	1.72E-166	579	314	658	seq1601	Malacostraca	Decapoda	Pinnotheridae	Pinnotheres	Pinnotheres pisum	NA	NA	NA	NA	5641
999	raw_singletons_barcode49	4.00E+97	8a249c01-33ee-4b59-8706-105d845bf244	99.367	316	2	0	1	316	343	658	8.06E-165	573	317	658	seq1600	Malacostraca	Decapoda	Pinnotheridae	Pinnotheres	Pinnotheres pisum	NA	NA	NA	NA	999
5625	raw_singletons_barcode50	4.00E+83	688d264b-1458-406c-b2b4-b360b3299c2a	99.363	314	1	1	1	314	346	658	3.73E-163	568	315	658	seq1601	Malacostraca	Decapoda	Pinnotheridae	Pinnotheres	Pinnotheres pisum	NA	NA	NA	NA	5625
5642	raw_singletons_barcode50	4.00E+83	f8b90053-1ce0-40d5-a3f9-c11d8b5983f1	99.361	313	2	0	1	313	346	658	3.71E-163	568	314	658	seq1600	Malacostraca	Decapoda	Pinnotheridae	Pinnotheres	Pinnotheres pisum	NA	NA	NA	NA	5642
18962	raw_singletons_barcode55	4.00E+97	bd42d393-99b7-40c0-97e3-1a17b0854fb3	99.361	313	1	1	1	312	346	658	1.33E-162	566	313	658	seq1601	Malacostraca	Decapoda	Pinnotheridae	Pinnotheres	Pinnotheres pisum	NA	NA	NA	NA	18962
5626	raw_singletons_barcode50	4.00E+83	688d264b-1458-406c-b2b4-b360b3299c2a	98.726	314	3	1	1	314	346	658	8.06E-160	556	315	658	seq1600	Malacostraca	Decapoda	Pinnotheridae	Pinnotheres	Pinnotheres pisum	NA	NA	NA	NA	5626
18963	raw_singletons_barcode55	4.00E+97	bd42d393-99b7-40c0-97e3-1a17b0854fb3	98.722	313	3	1	1	312	346	658	2.88E-159	555	313	658	seq1600	Malacostraca	Decapoda	Pinnotheridae	Pinnotheres	Pinnotheres pisum	NA	NA	NA	NA	18963
33720	raw_singletons_barcode58	4.00E+94	91f3cc6d-18c7-45dd-85d5-36571f24124d	98.68	303	4	0	11	313	356	658	2.91E-154	538	314	658	seq1601	Malacostraca	Decapoda	Pinnotheridae	Pinnotheres	Pinnotheres pisum	NA	NA	NA	NA	33720
42293	raw_singletons_barcode62	4.00E+87	2d04bbd5-4498-4888-a5d3-91ecc0949289	98.408	314	4	1	1	314	346	658	3.75E-158	551	315	658	seq1601	Malacostraca	Decapoda	Pinnotheridae	Pinnotheres	Pinnotheres pisum	NA	NA	NA	NA	42293
33752	raw_singletons_barcode58	4.00E+94	544e2052-1363-4017-8242-f6e95b33bac3	98.403	313	3	2	1	311	346	658	1.34E-157	549	312	658	seq1601	Malacostraca	Decapoda	Pinnotheridae	Pinnotheres	Pinnotheres pisum	NA	NA	NA	NA	33752
18946	raw_singletons_barcode55	4.00E+97	2e1c2b62-1bf5-4d8a-b84f-835c58db0dcb	98.233	283	5	0	31	313	376	658	1.78E-141	496	314	658	seq1601	Malacostraca	Decapoda	Pinnotheridae	Pinnotheres	Pinnotheres pisum	NA	NA	NA	NA	18946
5657	raw_singletons_barcode50	4.00E+83	2e8ea6bd-8159-4cbc-b112-900acc1d303a	98.113	318	1	2	1	318	346	658	1.37E-157	549	319	658	seq1601	Malacostraca	Decapoda	Pinnotheridae	Pinnotheres	Pinnotheres pisum	NA	NA	NA	NA	5657
33721	raw_singletons_barcode58	4.00E+94	91f3cc6d-18c7-45dd-85d5-36571f24124d	98.02	303	6	0	11	313	356	658	6.30E-151	527	314	658	seq1600	Malacostraca	Decapoda	Pinnotheridae	Pinnotheres	Pinnotheres pisum	NA	NA	NA	NA	33721
42465	raw_singletons_barcode62	4.00E+87	0c3bfb7c-af12-4f14-8683-e88d23a4a538	99.361	313	1	1	1	313	347	658	1.34E-162	566	314	658	seq1621	Malacostraca	Decapoda	Porcellanidae	Pisidia	Pisidia longicornis	NA	NA	NA	NA	42465
42466	raw_singletons_barcode62	4.00E+87	0c3bfb7c-af12-4f14-8683-e88d23a4a538	99.361	313	1	1	1	313	346	657	1.34E-162	566	314	657	seq1607	Malacostraca	Decapoda	Porcellanidae	Pisidia	Pisidia longicornis	NA	NA	NA	NA	42466
42467	raw_singletons_barcode62	4.00E+87	0c3bfb7c-af12-4f14-8683-e88d23a4a538	99.361	313	1	1	1	313	347	658	1.34E-162	566	314	658	seq1605	Malacostraca	Decapoda	Porcellanidae	Pisidia	Pisidia longicornis	NA	NA	NA	NA	42467
42468	raw_singletons_barcode62	4.00E+87	0c3bfb7c-af12-4f14-8683-e88d23a4a538	99.359	312	1	1	2	313	348	658	4.80E-162	564	314	658	seq1608	Malacostraca	Decapoda	Porcellanidae	Pisidia	Pisidia longicornis	NA	NA	NA	NA	42468
42469	raw_singletons_barcode62	4.00E+87	0c3bfb7c-af12-4f14-8683-e88d23a4a538	99.042	313	2	1	1	313	347	658	6.21E-161	560	314	658	seq1622	Malacostraca	Decapoda	Porcellanidae	Pisidia	Pisidia longicornis	NA	NA	NA	NA	42469
42470	raw_singletons_barcode62	4.00E+87	0c3bfb7c-af12-4f14-8683-e88d23a4a538	99.042	313	2	1	1	313	347	658	6.21E-161	560	314	658	seq1619	Malacostraca	Decapoda	Porcellanidae	Pisidia	Pisidia longicornis	NA	NA	NA	NA	42470
42471	raw_singletons_barcode62	4.00E+87	0c3bfb7c-af12-4f14-8683-e88d23a4a538	99.042	313	2	1	1	313	347	658	6.21E-161	560	314	658	seq1618	Malacostraca	Decapoda	Porcellanidae	Pisidia	Pisidia longicornis	NA	NA	NA	NA	42471
42472	raw_singletons_barcode62	4.00E+87	0c3bfb7c-af12-4f14-8683-e88d23a4a538	99.042	313	2	1	1	313	347	658	6.21E-161	560	314	658	seq1615	Malacostraca	Decapoda	Porcellanidae	Pisidia	Pisidia longicornis	NA	NA	NA	NA	42472
42473	raw_singletons_barcode62	4.00E+87	0c3bfb7c-af12-4f14-8683-e88d23a4a538	99.042	313	2	1	1	313	347	658	6.21E-161	560	314	658	seq1614	Malacostraca	Decapoda	Porcellanidae	Pisidia	Pisidia longicornis	NA	NA	NA	NA	42473
42474	raw_singletons_barcode62	4.00E+87	0c3bfb7c-af12-4f14-8683-e88d23a4a538	99.042	313	2	1	1	313	347	658	6.21E-161	560	314	658	seq1613	Malacostraca	Decapoda	Porcellanidae	Pisidia	Pisidia longicornis	NA	NA	NA	NA	42474
42475	raw_singletons_barcode62	4.00E+87	0c3bfb7c-af12-4f14-8683-e88d23a4a538	99.042	313	2	1	1	313	347	658	6.21E-161	560	314	658	seq1612	Malacostraca	Decapoda	Porcellanidae	Pisidia	Pisidia longicornis	NA	NA	NA	NA	42475
42476	raw_singletons_barcode62	4.00E+87	0c3bfb7c-af12-4f14-8683-e88d23a4a538	99.042	313	2	1	1	313	347	658	6.21E-161	560	314	658	seq1611	Malacostraca	Decapoda	Porcellanidae	Pisidia	Pisidia longicornis	NA	NA	NA	NA	42476
8206	raw_singletons_barcode50	4.00E+83	a6bc2388-1c18-40b9-99ce-ba116f3acbe5	98.722	313	3	1	1	312	346	658	2.88E-159	555	313	658	seq1621	Malacostraca	Decapoda	Porcellanidae	Pisidia	Pisidia longicornis	NA	NA	NA	NA	8206
8207	raw_singletons_barcode50	4.00E+83	a6bc2388-1c18-40b9-99ce-ba116f3acbe5	98.722	313	3	1	1	312	345	657	2.88E-159	555	313	657	seq1607	Malacostraca	Decapoda	Porcellanidae	Pisidia	Pisidia longicornis	NA	NA	NA	NA	8207
8208	raw_singletons_barcode50	4.00E+83	a6bc2388-1c18-40b9-99ce-ba116f3acbe5	98.722	313	3	1	1	312	346	658	2.88E-159	555	313	658	seq1605	Malacostraca	Decapoda	Porcellanidae	Pisidia	Pisidia longicornis	NA	NA	NA	NA	8208
23759	raw_singletons_barcode56	4.40E+95	62a9e893-b045-4644-acb3-538cfc6bd8c1	98.722	313	3	1	1	313	346	657	2.90E-159	555	315	658	seq1621	Malacostraca	Decapoda	Porcellanidae	Pisidia	Pisidia longicornis	NA	NA	NA	NA	23759
23760	raw_singletons_barcode56	4.40E+95	62a9e893-b045-4644-acb3-538cfc6bd8c1	98.722	313	3	1	1	313	345	656	2.90E-159	555	315	657	seq1607	Malacostraca	Decapoda	Porcellanidae	Pisidia	Pisidia longicornis	NA	NA	NA	NA	23760
23761	raw_singletons_barcode56	4.40E+95	62a9e893-b045-4644-acb3-538cfc6bd8c1	98.722	313	3	1	1	313	346	657	2.90E-159	555	315	658	seq1605	Malacostraca	Decapoda	Porcellanidae	Pisidia	Pisidia longicornis	NA	NA	NA	NA	23761
42477	raw_singletons_barcode62	4.00E+87	0c3bfb7c-af12-4f14-8683-e88d23a4a538	98.722	313	3	1	1	313	347	658	2.89E-159	555	314	658	seq1616	Malacostraca	Decapoda	Porcellanidae	Pisidia	Pisidia longicornis	NA	NA	NA	NA	42477
42478	raw_singletons_barcode62	4.00E+87	0c3bfb7c-af12-4f14-8683-e88d23a4a538	98.722	313	3	1	1	313	347	658	2.89E-159	555	314	658	seq1609	Malacostraca	Decapoda	Porcellanidae	Pisidia	Pisidia longicornis	NA	NA	NA	NA	42478
8209	raw_singletons_barcode50	4.00E+83	a6bc2388-1c18-40b9-99ce-ba116f3acbe5	98.714	311	3	1	3	312	348	658	3.73E-158	551	313	658	seq1608	Malacostraca	Decapoda	Porcellanidae	Pisidia	Pisidia longicornis	NA	NA	NA	NA	8209
23762	raw_singletons_barcode56	4.40E+95	62a9e893-b045-4644-acb3-538cfc6bd8c1	98.714	311	3	1	3	313	348	657	3.75E-158	551	315	658	seq1608	Malacostraca	Decapoda	Porcellanidae	Pisidia	Pisidia longicornis	NA	NA	NA	NA	23762
8210	raw_singletons_barcode50	4.00E+83	a6bc2388-1c18-40b9-99ce-ba116f3acbe5	98.403	313	4	1	1	312	346	658	1.34E-157	549	313	658	seq1622	Malacostraca	Decapoda	Porcellanidae	Pisidia	Pisidia longicornis	NA	NA	NA	NA	8210
8211	raw_singletons_barcode50	4.00E+83	a6bc2388-1c18-40b9-99ce-ba116f3acbe5	98.403	313	4	1	1	312	346	658	1.34E-157	549	313	658	seq1619	Malacostraca	Decapoda	Porcellanidae	Pisidia	Pisidia longicornis	NA	NA	NA	NA	8211
8212	raw_singletons_barcode50	4.00E+83	a6bc2388-1c18-40b9-99ce-ba116f3acbe5	98.403	313	4	1	1	312	346	658	1.34E-157	549	313	658	seq1618	Malacostraca	Decapoda	Porcellanidae	Pisidia	Pisidia longicornis	NA	NA	NA	NA	8212
8213	raw_singletons_barcode50	4.00E+83	a6bc2388-1c18-40b9-99ce-ba116f3acbe5	98.403	313	4	1	1	312	346	658	1.34E-157	549	313	658	seq1615	Malacostraca	Decapoda	Porcellanidae	Pisidia	Pisidia longicornis	NA	NA	NA	NA	8213
8214	raw_singletons_barcode50	4.00E+83	a6bc2388-1c18-40b9-99ce-ba116f3acbe5	98.403	313	4	1	1	312	346	658	1.34E-157	549	313	658	seq1614	Malacostraca	Decapoda	Porcellanidae	Pisidia	Pisidia longicornis	NA	NA	NA	NA	8214
8215	raw_singletons_barcode50	4.00E+83	a6bc2388-1c18-40b9-99ce-ba116f3acbe5	98.403	313	4	1	1	312	346	658	1.34E-157	549	313	658	seq1613	Malacostraca	Decapoda	Porcellanidae	Pisidia	Pisidia longicornis	NA	NA	NA	NA	8215
8216	raw_singletons_barcode50	4.00E+83	a6bc2388-1c18-40b9-99ce-ba116f3acbe5	98.403	313	4	1	1	312	346	658	1.34E-157	549	313	658	seq1612	Malacostraca	Decapoda	Porcellanidae	Pisidia	Pisidia longicornis	NA	NA	NA	NA	8216
8217	raw_singletons_barcode50	4.00E+83	a6bc2388-1c18-40b9-99ce-ba116f3acbe5	98.403	313	4	1	1	312	346	658	1.34E-157	549	313	658	seq1611	Malacostraca	Decapoda	Porcellanidae	Pisidia	Pisidia longicornis	NA	NA	NA	NA	8217
23763	raw_singletons_barcode56	4.40E+95	62a9e893-b045-4644-acb3-538cfc6bd8c1	98.403	313	4	1	1	313	346	657	1.35E-157	549	315	658	seq1622	Malacostraca	Decapoda	Porcellanidae	Pisidia	Pisidia longicornis	NA	NA	NA	NA	23763
23764	raw_singletons_barcode56	4.40E+95	62a9e893-b045-4644-acb3-538cfc6bd8c1	98.403	313	4	1	1	313	346	657	1.35E-157	549	315	658	seq1619	Malacostraca	Decapoda	Porcellanidae	Pisidia	Pisidia longicornis	NA	NA	NA	NA	23764
23765	raw_singletons_barcode56	4.40E+95	62a9e893-b045-4644-acb3-538cfc6bd8c1	98.403	313	4	1	1	313	346	657	1.35E-157	549	315	658	seq1618	Malacostraca	Decapoda	Porcellanidae	Pisidia	Pisidia longicornis	NA	NA	NA	NA	23765
23766	raw_singletons_barcode56	4.40E+95	62a9e893-b045-4644-acb3-538cfc6bd8c1	98.403	313	4	1	1	313	346	657	1.35E-157	549	315	658	seq1615	Malacostraca	Decapoda	Porcellanidae	Pisidia	Pisidia longicornis	NA	NA	NA	NA	23766
23767	raw_singletons_barcode56	4.40E+95	62a9e893-b045-4644-acb3-538cfc6bd8c1	98.403	313	4	1	1	313	346	657	1.35E-157	549	315	658	seq1614	Malacostraca	Decapoda	Porcellanidae	Pisidia	Pisidia longicornis	NA	NA	NA	NA	23767
23768	raw_singletons_barcode56	4.40E+95	62a9e893-b045-4644-acb3-538cfc6bd8c1	98.403	313	4	1	1	313	346	657	1.35E-157	549	315	658	seq1613	Malacostraca	Decapoda	Porcellanidae	Pisidia	Pisidia longicornis	NA	NA	NA	NA	23768
23769	raw_singletons_barcode56	4.40E+95	62a9e893-b045-4644-acb3-538cfc6bd8c1	98.403	313	4	1	1	313	346	657	1.35E-157	549	315	658	seq1612	Malacostraca	Decapoda	Porcellanidae	Pisidia	Pisidia longicornis	NA	NA	NA	NA	23769
23770	raw_singletons_barcode56	4.40E+95	62a9e893-b045-4644-acb3-538cfc6bd8c1	98.403	313	4	1	1	313	346	657	1.35E-157	549	315	658	seq1611	Malacostraca	Decapoda	Porcellanidae	Pisidia	Pisidia longicornis	NA	NA	NA	NA	23770
42479	raw_singletons_barcode62	4.00E+87	0c3bfb7c-af12-4f14-8683-e88d23a4a538	98.403	313	4	1	1	313	347	658	2.89E-159	555	314	658	seq1606	Malacostraca	Decapoda	Porcellanidae	Pisidia	Pisidia longicornis	NA	NA	NA	NA	42479
8218	raw_singletons_barcode50	4.00E+83	a6bc2388-1c18-40b9-99ce-ba116f3acbe5	98.083	313	5	1	1	312	346	658	6.24E-156	544	313	658	seq1616	Malacostraca	Decapoda	Porcellanidae	Pisidia	Pisidia longicornis	NA	NA	NA	NA	8218
8219	raw_singletons_barcode50	4.00E+83	a6bc2388-1c18-40b9-99ce-ba116f3acbe5	98.083	313	5	1	1	312	346	658	6.24E-156	544	313	658	seq1609	Malacostraca	Decapoda	Porcellanidae	Pisidia	Pisidia longicornis	NA	NA	NA	NA	8219
23771	raw_singletons_barcode56	4.40E+95	62a9e893-b045-4644-acb3-538cfc6bd8c1	98.083	313	5	1	1	313	346	657	6.28E-156	544	315	658	seq1616	Malacostraca	Decapoda	Porcellanidae	Pisidia	Pisidia longicornis	NA	NA	NA	NA	23771
23772	raw_singletons_barcode56	4.40E+95	62a9e893-b045-4644-acb3-538cfc6bd8c1	98.083	313	5	1	1	313	346	657	6.28E-156	544	315	658	seq1609	Malacostraca	Decapoda	Porcellanidae	Pisidia	Pisidia longicornis	NA	NA	NA	NA	23772
7567	raw_singletons_barcode50	4.00E+83	fcc24999-3b98-4f87-91c3-c06d7307f942	99.681	313	1	0	1	313	346	658	7.98E-165	573	314	658	seq1626	Polychaeta	Spionida	Poecilochaetidae	Poecilochaetus	Poecilochaetus serpens	NA	NA	NA	NA	7567
11673	raw_singletons_barcode51	4.00E+99	1c85e646-92df-4564-a0ee-ea8c365fdbdd	99.679	312	1	0	1	312	347	658	2.86E-164	571	313	658	seq1626	Polychaeta	Spionida	Poecilochaetidae	Poecilochaetus	Poecilochaetus serpens	NA	NA	NA	NA	11673
11664	raw_singletons_barcode51	4.00E+99	010bc284-ae5a-4d2e-9231-d9db9b7fa679	99.361	313	2	0	1	313	346	658	3.71E-163	568	314	658	seq1626	Polychaeta	Spionida	Poecilochaetidae	Poecilochaetus	Poecilochaetus serpens	NA	NA	NA	NA	11664
41449	raw_singletons_barcode61	4.00E+95	2c8764eb-c934-5498-89f4-5780a93b076c	98.73	315	2	1	1	315	346	658	2.25E-160	558	316	658	seq1665	Malacostraca	Decapoda	Processidae	Processa	Processa modica	NA	NA	NA	NA	41449
41450	raw_singletons_barcode61	4.00E+95	2c8764eb-c934-5498-89f4-5780a93b076c	98.73	315	2	1	1	315	346	658	2.25E-160	558	316	658	seq1664	Malacostraca	Decapoda	Processidae	Processa	Processa modica	NA	NA	NA	NA	41450
38789	raw_singletons_barcode59	4.00E+98	6ab00da7-19a9-582c-9e58-690f21296d40	98.556	277	2	2	6	281	352	627	2.93E-139	488	310	658	seq1666	Malacostraca	Decapoda	Processidae	Processa	Processa modica	NA	NA	NA	NA	38789
38790	raw_singletons_barcode59	4.00E+98	6ab00da7-19a9-582c-9e58-690f21296d40	98.556	277	2	2	6	281	352	627	2.93E-139	488	310	658	seq1665	Malacostraca	Decapoda	Processidae	Processa	Processa modica	NA	NA	NA	NA	38790
38791	raw_singletons_barcode59	4.00E+98	6ab00da7-19a9-582c-9e58-690f21296d40	98.556	277	2	2	6	281	352	627	2.93E-139	488	310	658	seq1664	Malacostraca	Decapoda	Processidae	Processa	Processa modica	NA	NA	NA	NA	38791
41451	raw_singletons_barcode61	4.00E+95	2c8764eb-c934-5498-89f4-5780a93b076c	98.413	315	3	1	1	315	346	658	1.05E-158	553	316	658	seq1666	Malacostraca	Decapoda	Processidae	Processa	Processa modica	NA	NA	NA	NA	41451
34401	raw_singletons_barcode58	4.00E+94	4f4ae8d1-b5d1-482a-9d09-5b9692da9c4f	98.382	309	2	3	5	310	350	658	8.01E-155	540	311	658	seq1665	Malacostraca	Decapoda	Processidae	Processa	Processa modica	NA	NA	NA	NA	34401
34402	raw_singletons_barcode58	4.00E+94	4f4ae8d1-b5d1-482a-9d09-5b9692da9c4f	98.382	309	2	3	5	310	350	658	8.01E-155	540	311	658	seq1664	Malacostraca	Decapoda	Processidae	Processa	Processa modica	NA	NA	NA	NA	34402
34403	raw_singletons_barcode58	4.00E+94	4f4ae8d1-b5d1-482a-9d09-5b9692da9c4f	98.058	309	3	3	5	310	350	658	3.73E-153	534	311	658	seq1666	Malacostraca	Decapoda	Processidae	Processa	Processa modica	NA	NA	NA	NA	34403
38216	raw_singletons_barcode59	4.00E+98	803b73a5-4176-4a40-bf87-471877094afc	100	314	0	0	1	314	178	491	4.77E-167	580	314	645	seq1683	Echinoidea	Camarodonta	Echinidae	Psammechinus	Psammechinus miliaris	NA	NA	NA	NA	38216
38217	raw_singletons_barcode59	4.00E+98	803b73a5-4176-4a40-bf87-471877094afc	100	313	0	0	1	313	346	658	1.72E-166	579	314	658	seq1680	Echinoidea	Camarodonta	Echinidae	Psammechinus	Psammechinus miliaris	NA	NA	NA	NA	38217
38218	raw_singletons_barcode59	4.00E+98	803b73a5-4176-4a40-bf87-471877094afc	100	313	0	0	1	313	346	658	1.72E-166	579	314	658	seq1679	Echinoidea	Camarodonta	Echinidae	Psammechinus	Psammechinus miliaris	NA	NA	NA	NA	38218
38219	raw_singletons_barcode59	4.00E+98	803b73a5-4176-4a40-bf87-471877094afc	99.681	313	1	0	1	313	346	658	7.98E-165	573	314	658	seq1681	Echinoidea	Camarodonta	Echinidae	Psammechinus	Psammechinus miliaris	NA	NA	NA	NA	38219
38220	raw_singletons_barcode59	4.00E+98	803b73a5-4176-4a40-bf87-471877094afc	99.681	313	1	0	1	313	346	658	7.98E-165	573	314	658	seq1678	Echinoidea	Camarodonta	Echinidae	Psammechinus	Psammechinus miliaris	NA	NA	NA	NA	38220
38221	raw_singletons_barcode59	4.00E+98	803b73a5-4176-4a40-bf87-471877094afc	99.681	313	1	0	1	313	346	658	7.98E-165	573	314	658	seq1676	Echinoidea	Camarodonta	Echinidae	Psammechinus	Psammechinus miliaris	NA	NA	NA	NA	38221
38222	raw_singletons_barcode59	4.00E+98	803b73a5-4176-4a40-bf87-471877094afc	99.363	314	2	0	1	314	178	491	1.03E-163	569	314	655	seq1682	Echinoidea	Camarodonta	Echinidae	Psammechinus	Psammechinus miliaris	NA	NA	NA	NA	38222
38223	raw_singletons_barcode59	4.00E+98	803b73a5-4176-4a40-bf87-471877094afc	99.361	313	2	0	1	313	346	658	3.71E-163	568	314	658	seq1677	Echinoidea	Camarodonta	Echinidae	Psammechinus	Psammechinus miliaris	NA	NA	NA	NA	38223
38224	raw_singletons_barcode59	4.00E+98	803b73a5-4176-4a40-bf87-471877094afc	98.99	297	2	1	1	296	346	642	4.87E-152	531	314	642	seq1675	Echinoidea	Camarodonta	Echinidae	Psammechinus	Psammechinus miliaris	NA	NA	NA	NA	38224
38184	raw_singletons_barcode59	4.00E+98	a970ab2c-94c7-4fdd-847e-1b49a6df752a	98.726	314	1	3	1	313	180	491	2.88E-159	555	313	645	seq1683	Echinoidea	Camarodonta	Echinidae	Psammechinus	Psammechinus miliaris	NA	NA	NA	NA	38184
38185	raw_singletons_barcode59	4.00E+98	a970ab2c-94c7-4fdd-847e-1b49a6df752a	98.722	313	1	3	1	312	348	658	1.04E-158	553	313	658	seq1680	Echinoidea	Camarodonta	Echinidae	Psammechinus	Psammechinus miliaris	NA	NA	NA	NA	38185
38186	raw_singletons_barcode59	4.00E+98	a970ab2c-94c7-4fdd-847e-1b49a6df752a	98.722	313	1	3	1	312	348	658	1.04E-158	553	313	658	seq1679	Echinoidea	Camarodonta	Echinidae	Psammechinus	Psammechinus miliaris	NA	NA	NA	NA	38186
18649	raw_singletons_barcode55	4.00E+97	a6f2b047-0fc8-4c49-819d-a4cc750616f2	98.587	283	4	0	1	283	348	630	3.82E-143	501	314	658	seq1678	Echinoidea	Camarodonta	Echinidae	Psammechinus	Psammechinus miliaris	NA	NA	NA	NA	18649
38187	raw_singletons_barcode59	4.00E+98	a970ab2c-94c7-4fdd-847e-1b49a6df752a	98.403	313	2	3	1	312	348	658	4.82E-157	547	313	658	seq1681	Echinoidea	Camarodonta	Echinidae	Psammechinus	Psammechinus miliaris	NA	NA	NA	NA	38187
38188	raw_singletons_barcode59	4.00E+98	a970ab2c-94c7-4fdd-847e-1b49a6df752a	98.403	313	2	3	1	312	348	658	4.82E-157	547	313	658	seq1678	Echinoidea	Camarodonta	Echinidae	Psammechinus	Psammechinus miliaris	NA	NA	NA	NA	38188
38189	raw_singletons_barcode59	4.00E+98	a970ab2c-94c7-4fdd-847e-1b49a6df752a	98.403	313	2	3	1	312	348	658	4.82E-157	547	313	658	seq1676	Echinoidea	Camarodonta	Echinidae	Psammechinus	Psammechinus miliaris	NA	NA	NA	NA	38189
18650	raw_singletons_barcode55	4.00E+97	a6f2b047-0fc8-4c49-819d-a4cc750616f2	98.233	283	5	0	1	283	180	462	1.78E-141	496	314	645	seq1683	Echinoidea	Camarodonta	Echinidae	Psammechinus	Psammechinus miliaris	NA	NA	NA	NA	18650
18651	raw_singletons_barcode55	4.00E+97	a6f2b047-0fc8-4c49-819d-a4cc750616f2	98.233	283	5	0	1	283	180	462	1.78E-141	496	314	655	seq1682	Echinoidea	Camarodonta	Echinidae	Psammechinus	Psammechinus miliaris	NA	NA	NA	NA	18651
18652	raw_singletons_barcode55	4.00E+97	a6f2b047-0fc8-4c49-819d-a4cc750616f2	98.233	283	5	0	1	283	348	630	1.78E-141	496	314	658	seq1681	Echinoidea	Camarodonta	Echinidae	Psammechinus	Psammechinus miliaris	NA	NA	NA	NA	18652
18653	raw_singletons_barcode55	4.00E+97	a6f2b047-0fc8-4c49-819d-a4cc750616f2	98.233	283	5	0	1	283	348	630	1.78E-141	496	314	658	seq1680	Echinoidea	Camarodonta	Echinidae	Psammechinus	Psammechinus miliaris	NA	NA	NA	NA	18653
18654	raw_singletons_barcode55	4.00E+97	a6f2b047-0fc8-4c49-819d-a4cc750616f2	98.233	283	5	0	1	283	348	630	1.78E-141	496	314	658	seq1679	Echinoidea	Camarodonta	Echinidae	Psammechinus	Psammechinus miliaris	NA	NA	NA	NA	18654
18655	raw_singletons_barcode55	4.00E+97	a6f2b047-0fc8-4c49-819d-a4cc750616f2	98.233	283	5	0	1	283	348	630	1.78E-141	496	314	658	seq1677	Echinoidea	Camarodonta	Echinidae	Psammechinus	Psammechinus miliaris	NA	NA	NA	NA	18655
18656	raw_singletons_barcode55	4.00E+97	a6f2b047-0fc8-4c49-819d-a4cc750616f2	98.233	283	5	0	1	283	348	630	1.78E-141	496	314	642	seq1675	Echinoidea	Camarodonta	Echinidae	Psammechinus	Psammechinus miliaris	NA	NA	NA	NA	18656
38190	raw_singletons_barcode59	4.00E+98	a970ab2c-94c7-4fdd-847e-1b49a6df752a	98.089	314	3	3	1	313	180	491	6.24E-156	544	313	655	seq1682	Echinoidea	Camarodonta	Echinidae	Psammechinus	Psammechinus miliaris	NA	NA	NA	NA	38190
38191	raw_singletons_barcode59	4.00E+98	a970ab2c-94c7-4fdd-847e-1b49a6df752a	98.083	313	3	3	1	312	348	658	2.24E-155	542	313	658	seq1677	Echinoidea	Camarodonta	Echinidae	Psammechinus	Psammechinus miliaris	NA	NA	NA	NA	38191
152	raw_singletons_barcode49	4.00E+97	586981ea-0146-48bc-a708-a71557a98209	98.718	312	3	1	1	312	348	658	1.04E-158	553	313	658	seq1686	Malacostraca	Cumacea	Pseudocumatidae	Pseudocuma	Pseudocuma longicorne	NA	NA	NA	NA	152
158	raw_singletons_barcode49	4.00E+97	2c932e33-a80b-4e02-9e1e-4a449a03231f	98.403	313	4	1	1	312	346	658	1.34E-157	549	313	658	seq1686	Malacostraca	Cumacea	Pseudocumatidae	Pseudocuma	Pseudocuma longicorne	NA	NA	NA	NA	158
34009	raw_singletons_barcode58	4.00E+94	af79cbdb-459a-5136-b013-69041d731694	98.824	255	1	2	1	253	346	600	1.08E-128	453	314	658	seq1709	Polychaeta	Sabellida	Sabellariidae	Sabellaria	Sabellaria spinulosa	NA	NA	NA	NA	34009
34010	raw_singletons_barcode58	4.00E+94	af79cbdb-459a-5136-b013-69041d731694	98.431	255	2	2	1	253	346	600	1.40E-127	449	314	658	seq1710	Polychaeta	Sabellida	Sabellariidae	Sabellaria	Sabellaria spinulosa	NA	NA	NA	NA	34010
34011	raw_singletons_barcode58	4.00E+94	af79cbdb-459a-5136-b013-69041d731694	98.394	249	3	1	1	248	284	532	1.09E-123	436	314	596	seq1708	Polychaeta	Sabellida	Sabellariidae	Sabellaria	Sabellaria spinulosa	NA	NA	NA	NA	34011
411	raw_singletons_barcode49	4.00E+97	d3903fe5-3b12-4192-8ea3-c46ae5b0499c	98.361	305	1	2	10	311	355	658	1.35E-152	532	312	658	seq1709	Polychaeta	Sabellida	Sabellariidae	Sabellaria	Sabellaria spinulosa	NA	NA	NA	NA	411
412	raw_singletons_barcode49	4.00E+97	d3903fe5-3b12-4192-8ea3-c46ae5b0499c	98.033	305	2	2	10	311	355	658	1.74E-151	529	312	658	seq1710	Polychaeta	Sabellida	Sabellariidae	Sabellaria	Sabellaria spinulosa	NA	NA	NA	NA	412
41456	raw_singletons_barcode61	4.00E+95	c9126b81-fc48-4f87-91f7-f9bba2cea3a8	99.363	314	1	1	1	314	346	658	3.73E-163	568	315	658	seq1751	Polychaeta	Spionida	Spionidae	Scolelepis	Scolelepis bonnieri	NA	NA	NA	NA	41456
41457	raw_singletons_barcode61	4.00E+95	c9126b81-fc48-4f87-91f7-f9bba2cea3a8	99.045	314	2	1	1	314	346	658	1.73E-161	562	315	658	seq1750	Polychaeta	Spionida	Spionidae	Scolelepis	Scolelepis bonnieri	NA	NA	NA	NA	41457
41458	raw_singletons_barcode61	4.00E+95	c9126b81-fc48-4f87-91f7-f9bba2cea3a8	99.045	314	2	1	1	314	346	658	1.73E-161	562	315	658	seq1749	Polychaeta	Spionida	Spionidae	Scolelepis	Scolelepis bonnieri	NA	NA	NA	NA	41458
41459	raw_singletons_barcode61	4.00E+95	c9126b81-fc48-4f87-91f7-f9bba2cea3a8	99.045	314	2	1	1	314	333	645	1.73E-161	562	315	645	seq1747	Polychaeta	Spionida	Spionidae	Scolelepis	Scolelepis bonnieri	NA	NA	NA	NA	41459
41460	raw_singletons_barcode61	4.00E+95	c9126b81-fc48-4f87-91f7-f9bba2cea3a8	99.045	314	2	1	1	314	346	658	1.73E-161	562	315	658	seq1745	Polychaeta	Spionida	Spionidae	Scolelepis	Scolelepis bonnieri	NA	NA	NA	NA	41460
41461	raw_singletons_barcode61	4.00E+95	c9126b81-fc48-4f87-91f7-f9bba2cea3a8	98.726	314	3	1	1	314	346	658	8.06E-160	556	315	658	seq1746	Polychaeta	Spionida	Spionidae	Scolelepis	Scolelepis bonnieri	NA	NA	NA	NA	41461
491	raw_singletons_barcode49	4.00E+97	cbec03c8-0159-47bd-b113-2ecfe9cb8065	98.571	280	1	2	35	312	380	658	2.29E-140	492	313	658	seq1751	Polychaeta	Spionida	Spionidae	Scolelepis	Scolelepis bonnieri	NA	NA	NA	NA	491
492	raw_singletons_barcode49	4.00E+97	cbec03c8-0159-47bd-b113-2ecfe9cb8065	98.214	280	2	2	35	312	380	658	1.07E-138	486	313	658	seq1750	Polychaeta	Spionida	Spionidae	Scolelepis	Scolelepis bonnieri	NA	NA	NA	NA	492
493	raw_singletons_barcode49	4.00E+97	cbec03c8-0159-47bd-b113-2ecfe9cb8065	98.214	280	2	2	35	312	380	658	1.07E-138	486	313	658	seq1749	Polychaeta	Spionida	Spionidae	Scolelepis	Scolelepis bonnieri	NA	NA	NA	NA	493
494	raw_singletons_barcode49	4.00E+97	cbec03c8-0159-47bd-b113-2ecfe9cb8065	98.214	280	2	2	35	312	367	645	1.07E-138	486	313	645	seq1747	Polychaeta	Spionida	Spionidae	Scolelepis	Scolelepis bonnieri	NA	NA	NA	NA	494
495	raw_singletons_barcode49	4.00E+97	cbec03c8-0159-47bd-b113-2ecfe9cb8065	98.214	280	2	2	35	312	380	658	1.07E-138	486	313	658	seq1745	Polychaeta	Spionida	Spionidae	Scolelepis	Scolelepis bonnieri	NA	NA	NA	NA	495
41462	raw_singletons_barcode61	4.00E+95	c9126b81-fc48-4f87-91f7-f9bba2cea3a8	98.089	314	5	1	1	314	346	658	1.75E-156	545	315	658	seq1748	Polychaeta	Spionida	Spionidae	Scolelepis	Scolelepis bonnieri	NA	NA	NA	NA	41462
4484	raw_singletons_barcode49	4.00E+97	43dc5781-95b1-5097-b6e6-2066cd0f5fba	100	306	0	0	1	306	346	651	1.31E-162	566	309	655	seq1759	Polychaeta	Polychaeta_incertae_sedis	Orbiniidae	Scoloplos	Scoloplos armiger	NA	NA	NA	NA	4484
4485	raw_singletons_barcode49	4.00E+97	43dc5781-95b1-5097-b6e6-2066cd0f5fba	99.673	306	1	0	1	306	346	651	6.11E-161	560	309	655	seq1758	Polychaeta	Polychaeta_incertae_sedis	Orbiniidae	Scoloplos	Scoloplos armiger	NA	NA	NA	NA	4485
4486	raw_singletons_barcode49	4.00E+97	43dc5781-95b1-5097-b6e6-2066cd0f5fba	99.673	306	1	0	1	306	346	651	6.11E-161	560	309	655	seq1756	Polychaeta	Polychaeta_incertae_sedis	Orbiniidae	Scoloplos	Scoloplos armiger	NA	NA	NA	NA	4486
4487	raw_singletons_barcode49	4.00E+97	43dc5781-95b1-5097-b6e6-2066cd0f5fba	99.346	306	2	0	1	306	346	651	2.20E-160	558	309	655	seq1757	Polychaeta	Polychaeta_incertae_sedis	Orbiniidae	Scoloplos	Scoloplos armiger	NA	NA	NA	NA	4487
4489	raw_singletons_barcode49	4.00E+97	43dc5781-95b1-5097-b6e6-2066cd0f5fba	99.237	262	2	0	1	262	316	577	8.18E-135	473	309	577	seq1760	Polychaeta	Polychaeta_incertae_sedis	Orbiniidae	Scoloplos	Scoloplos armiger	NA	NA	NA	NA	4489
4468	raw_singletons_barcode49	4.00E+97	440d3a79-3278-4747-89e9-007c785f1521	98.361	305	2	3	1	303	346	649	1.34E-152	532	310	655	seq1758	Polychaeta	Polychaeta_incertae_sedis	Orbiniidae	Scoloplos	Scoloplos armiger	NA	NA	NA	NA	4468
4469	raw_singletons_barcode49	4.00E+97	440d3a79-3278-4747-89e9-007c785f1521	98.361	305	2	3	1	303	346	649	1.34E-152	532	310	655	seq1756	Polychaeta	Polychaeta_incertae_sedis	Orbiniidae	Scoloplos	Scoloplos armiger	NA	NA	NA	NA	4469
4472	raw_singletons_barcode49	4.00E+97	440d3a79-3278-4747-89e9-007c785f1521	98.099	263	2	3	1	261	316	577	2.97E-129	455	310	577	seq1760	Polychaeta	Polychaeta_incertae_sedis	Orbiniidae	Scoloplos	Scoloplos armiger	NA	NA	NA	NA	4472
45178	raw_singletons_barcode63	4.04E+92	0dff3b19-608e-44eb-b0b2-f5e2f43b399b	98.099	263	3	2	1	262	316	577	8.30E-130	457	311	577	seq1760	Polychaeta	Polychaeta_incertae_sedis	Orbiniidae	Scoloplos	Scoloplos armiger	NA	NA	NA	NA	45178
4470	raw_singletons_barcode49	4.00E+97	440d3a79-3278-4747-89e9-007c785f1521	98.033	305	3	3	1	303	346	649	6.22E-151	527	310	655	seq1759	Polychaeta	Polychaeta_incertae_sedis	Orbiniidae	Scoloplos	Scoloplos armiger	NA	NA	NA	NA	4470
2678	raw_singletons_barcode49	4.00E+97	2289fdc5-e5ef-45c8-af92-bed0de0d3c08	98.089	314	4	2	1	313	346	658	1.74E-156	545	314	658	seq1792	Hydrozoa	Leptothecata	Sertulariidae	Sertularia	Sertularia cupressina	NA	NA	NA	NA	2678
6622	raw_singletons_barcode50	4.00E+83	d10a70fa-373e-42dd-a524-16a36d0023ee	99.361	313	1	1	1	312	346	658	1.33E-162	566	313	658	seq1794	Polychaeta	Phyllodocida	Sigalionidae	Sigalion	Sigalion mathildae	NA	NA	NA	NA	6622
6623	raw_singletons_barcode50	4.00E+83	d10a70fa-373e-42dd-a524-16a36d0023ee	98.722	313	3	1	1	312	346	658	2.88E-159	555	313	658	seq1795	Polychaeta	Phyllodocida	Sigalionidae	Sigalion	Sigalion mathildae	NA	NA	NA	NA	6623
6624	raw_singletons_barcode50	4.00E+83	d10a70fa-373e-42dd-a524-16a36d0023ee	98.083	313	5	1	1	312	346	658	6.24E-156	544	313	658	seq1793	Polychaeta	Phyllodocida	Sigalionidae	Sigalion	Sigalion mathildae	NA	NA	NA	NA	6624
	Barcode	Total_readcount	SeqID	PercIdent	Alignmentlength	Mismatch	Gapopen	QueryStart	QueryEnd	SubjectStart	SubjectEnd	Evalue	Bitscore	Querylength	Subjectlength	SseqID					species	Taxonomy.order	Taxonomy.family	Taxonomy.genus	Taxonomy.species	Unique_number
41655	raw_singletons_barcode61	4.00E+95	d2ff5396-b9a1-4db9-a85a-cc62cfb1dc37	100	312	0	0	1	312	347	658	6.15E-166	577	313	658	seq1817	Polychaeta	Spionida	Spionidae	Spiophanes	Spiophanes bombyx	NA	NA	NA	NA	41655
41656	raw_singletons_barcode61	4.00E+95	d2ff5396-b9a1-4db9-a85a-cc62cfb1dc37	99.679	312	1	0	1	312	347	658	2.86E-164	571	313	658	seq1816	Polychaeta	Spionida	Spionidae	Spiophanes	Spiophanes bombyx	NA	NA	NA	NA	41656
41657	raw_singletons_barcode61	4.00E+95	d2ff5396-b9a1-4db9-a85a-cc62cfb1dc37	99.359	312	2	0	1	312	347	658	1.33E-162	566	313	658	seq1815	Polychaeta	Spionida	Spionidae	Spiophanes	Spiophanes bombyx	NA	NA	NA	NA	41657
41658	raw_singletons_barcode61	4.00E+95	d2ff5396-b9a1-4db9-a85a-cc62cfb1dc37	99.359	312	2	0	1	312	346	657	1.33E-162	566	313	657	seq1812	Polychaeta	Spionida	Spionidae	Spiophanes	Spiophanes bombyx	NA	NA	NA	NA	41658
41659	raw_singletons_barcode61	4.00E+95	d2ff5396-b9a1-4db9-a85a-cc62cfb1dc37	99.359	312	2	0	1	312	347	658	1.33E-162	566	313	658	seq1811	Polychaeta	Spionida	Spionidae	Spiophanes	Spiophanes bombyx	NA	NA	NA	NA	41659
41661	raw_singletons_barcode61	4.00E+95	d2ff5396-b9a1-4db9-a85a-cc62cfb1dc37	99.344	305	2	0	1	305	339	643	1.04E-158	553	313	643	seq1814	Polychaeta	Spionida	Spionidae	Spiophanes	Spiophanes bombyx	NA	NA	NA	NA	41661
41660	raw_singletons_barcode61	4.00E+95	d2ff5396-b9a1-4db9-a85a-cc62cfb1dc37	99.038	312	3	0	1	312	347	658	6.19E-161	560	313	658	seq1813	Polychaeta	Spionida	Spionidae	Spiophanes	Spiophanes bombyx	NA	NA	NA	NA	41660
32578	raw_singletons_barcode58	4.00E+94	3413bfa3-c352-469b-be7c-e66f6677abcf	98.551	276	4	0	1	276	346	621	2.99E-139	488	316	658	seq1815	Polychaeta	Spionida	Spionidae	Spiophanes	Spiophanes bombyx	NA	NA	NA	NA	32578
32579	raw_singletons_barcode58	4.00E+94	3413bfa3-c352-469b-be7c-e66f6677abcf	98.551	276	4	0	1	276	338	613	2.99E-139	488	316	643	seq1814	Polychaeta	Spionida	Spionidae	Spiophanes	Spiophanes bombyx	NA	NA	NA	NA	32579
32581	raw_singletons_barcode58	4.00E+94	3413bfa3-c352-469b-be7c-e66f6677abcf	98.551	276	4	0	1	276	346	621	2.99E-139	488	316	658	seq1811	Polychaeta	Spionida	Spionidae	Spiophanes	Spiophanes bombyx	NA	NA	NA	NA	32581
32583	raw_singletons_barcode58	4.00E+94	3413bfa3-c352-469b-be7c-e66f6677abcf	98.188	276	5	0	1	276	346	621	1.39E-137	483	316	658	seq1816	Polychaeta	Spionida	Spionidae	Spiophanes	Spiophanes bombyx	NA	NA	NA	NA	32583
32584	raw_singletons_barcode58	4.00E+94	3413bfa3-c352-469b-be7c-e66f6677abcf	98.188	276	5	0	1	276	346	621	1.39E-137	483	316	658	seq1813	Polychaeta	Spionida	Spionidae	Spiophanes	Spiophanes bombyx	NA	NA	NA	NA	32584
23194	raw_singletons_barcode56	4.40E+95	6cd3aafc-9b44-4432-92f4-1a97114b4cff	99.583	240	1	0	72	311	419	658	3.02E-124	438	312	658	seq1831	Bivalvia	Venerida	Mactridae	Spisula	Spisula elliptica	NA	NA	NA	NA	23194
23195	raw_singletons_barcode56	4.40E+95	6cd3aafc-9b44-4432-92f4-1a97114b4cff	99.583	240	1	0	72	311	419	658	3.02E-124	438	312	658	seq1829	Bivalvia	Venerida	Mactridae	Spisula	Spisula elliptica	NA	NA	NA	NA	23195
23196	raw_singletons_barcode56	4.40E+95	6cd3aafc-9b44-4432-92f4-1a97114b4cff	99.583	240	1	0	72	311	419	658	3.02E-124	438	312	658	seq1827	Bivalvia	Venerida	Mactridae	Spisula	Spisula elliptica	NA	NA	NA	NA	23196
23197	raw_singletons_barcode56	4.40E+95	6cd3aafc-9b44-4432-92f4-1a97114b4cff	99.583	240	1	0	72	311	419	658	3.02E-124	438	312	658	seq1823	Bivalvia	Venerida	Mactridae	Spisula	Spisula elliptica	NA	NA	NA	NA	23197
23198	raw_singletons_barcode56	4.40E+95	6cd3aafc-9b44-4432-92f4-1a97114b4cff	99.167	240	2	0	72	311	419	658	1.40E-122	433	312	658	seq1828	Bivalvia	Venerida	Mactridae	Spisula	Spisula elliptica	NA	NA	NA	NA	23198
23199	raw_singletons_barcode56	4.40E+95	6cd3aafc-9b44-4432-92f4-1a97114b4cff	99.167	240	2	0	72	311	419	658	1.40E-122	433	312	658	seq1825	Bivalvia	Venerida	Mactridae	Spisula	Spisula elliptica	NA	NA	NA	NA	23199
23200	raw_singletons_barcode56	4.40E+95	6cd3aafc-9b44-4432-92f4-1a97114b4cff	99.167	240	2	0	72	311	419	658	1.40E-122	433	312	658	seq1824	Bivalvia	Venerida	Mactridae	Spisula	Spisula elliptica	NA	NA	NA	NA	23200
23201	raw_singletons_barcode56	4.40E+95	6cd3aafc-9b44-4432-92f4-1a97114b4cff	98.333	240	4	0	72	311	419	658	3.04E-119	422	312	658	seq1830	Bivalvia	Venerida	Mactridae	Spisula	Spisula elliptica	NA	NA	NA	NA	23201
43941	raw_singletons_barcode63	4.04E+92	02382a6a-bd46-4b4b-843a-8b9e13214a84	99.683	315	0	1	1	315	357	670	2.23E-165	575	315	698	seq1868	Polychaeta	Phyllodocida	Syllidae	Streptodonta	Streptodonta pterochaeta	NA	NA	NA	NA	43941
12233	raw_singletons_barcode51	4.00E+99	a55d3b58-a206-4065-960c-a92fd3f6eca7	99.361	313	0	2	1	312	357	668	1.34E-162	566	314	698	seq1868	Polychaeta	Phyllodocida	Syllidae	Streptodonta	Streptodonta pterochaeta	NA	NA	NA	NA	12233
35634	raw_singletons_barcode58	4.00E+94	cd212586-308f-4bf8-bb49-a6f5985c948c	99.19	247	2	0	1	247	357	603	1.73E-126	446	300	698	seq1868	Polychaeta	Phyllodocida	Syllidae	Streptodonta	Streptodonta pterochaeta	NA	NA	NA	NA	35634
24653	raw_singletons_barcode56	4.40E+95	88ac2ee3-c805-4281-8496-386f700a29a1	99.216	255	2	0	59	313	404	658	6.48E-131	460	314	658	seq1291	Polychaeta	Phyllodocida	Syllidae	Streptosyllis	Streptosyllis websteri	NA	NA	NA	NA	24653
17392	raw_singletons_barcode55	4.00E+97	9cfb8e19-7973-4306-a8a4-b1b0e881ce37	99.042	313	3	0	1	313	346	658	1.73E-161	562	314	658	seq1291	Polychaeta	Phyllodocida	Syllidae	Streptosyllis	Streptosyllis websteri	NA	NA	NA	NA	17392
24669	raw_singletons_barcode56	4.40E+95	5eac36d5-cf02-41fa-99a5-db03c6fb69dc	99.013	304	1	2	11	313	356	658	6.26E-156	544	314	658	seq1291	Polychaeta	Phyllodocida	Syllidae	Streptosyllis	Streptosyllis websteri	NA	NA	NA	NA	24669
6496	raw_singletons_barcode50	4.00E+83	2df9d38f-7920-56a0-8d1f-ed4323de90e5	98.929	280	2	1	1	280	357	635	1.36E-142	499	312	645	seq1869	Polychaeta	Phyllodocida	Syllidae	Streptosyllis	Streptosyllis websteri	NA	NA	NA	NA	6496
17393	raw_singletons_barcode55	4.00E+97	9cfb8e19-7973-4306-a8a4-b1b0e881ce37	98.616	289	4	0	1	289	357	645	1.76E-146	512	314	645	seq1869	Polychaeta	Phyllodocida	Syllidae	Streptosyllis	Streptosyllis websteri	NA	NA	NA	NA	17393
15025	raw_singletons_barcode54	4.00E+85	8bb4eafe-912d-40be-877b-7ad2424af320	100	312	0	0	2	313	347	658	6.17E-166	577	314	658	seq1884	Bivalvia	Galeommatida	Lasaeidae	Tellimya	Tellimya ferruginosa	NA	NA	NA	NA	15025
15026	raw_singletons_barcode54	4.00E+85	8bb4eafe-912d-40be-877b-7ad2424af320	100	312	0	0	2	313	347	658	6.17E-166	577	314	658	seq1883	Bivalvia	Galeommatida	Lasaeidae	Tellimya	Tellimya ferruginosa	NA	NA	NA	NA	15026
42921	raw_singletons_barcode62	4.00E+87	90239d83-fb7a-5d91-a161-ee1dc9b6ee0c	99.359	312	1	1	1	311	347	658	4.77E-162	564	312	658	seq1884	Bivalvia	Galeommatida	Lasaeidae	Tellimya	Tellimya ferruginosa	NA	NA	NA	NA	42921
42922	raw_singletons_barcode62	4.00E+87	90239d83-fb7a-5d91-a161-ee1dc9b6ee0c	99.359	312	1	1	1	311	347	658	4.77E-162	564	312	658	seq1883	Bivalvia	Galeommatida	Lasaeidae	Tellimya	Tellimya ferruginosa	NA	NA	NA	NA	42922
45717	raw_singletons_barcode64	4.00E+89	3076a490-fd40-4150-bf31-13c06b754138	99.353	309	2	0	1	309	345	653	6.23E-161	560	315	657	seq478	Clitellata	Haplotaxida	Naididae	Tubificoides	Tubificoides diazi	NA	NA	NA	NA	45717
30031	raw_singletons_barcode57	4.00E+60	5bcad942-ca0d-46e6-8e11-b5c901ab0f89	98.408	314	3	2	1	313	345	657	3.74E-158	551	314	657	seq478	Clitellata	Haplotaxida	Naididae	Tubificoides	Tubificoides diazi	NA	NA	NA	NA	30031
45064	raw_singletons_barcode63	4.04E+92	5aa2560e-03ce-5d02-ab68-2c57d6778d17	98.739	238	3	0	75	312	418	655	8.45E-120	424	312	661	seq1968	Malacostraca	Amphipoda	Urothoidae	Urothoe	Urothoe brevicornis	NA	NA	NA	NA	45064
